# Supplementary material for: An Integrated Genomic Approach for Rapid Delineation of Candidate Genes Regulating Agro-Morphological Traits in Chickpea
Source: PubMed Central journal article supplement (PMC4263302; doi:10.1093/dnares/dsu031), 2014-10-21
Supplement: supp_dsu031_dsu031supp.pdf [file supp_dsu031_dsu031supp.pdf]

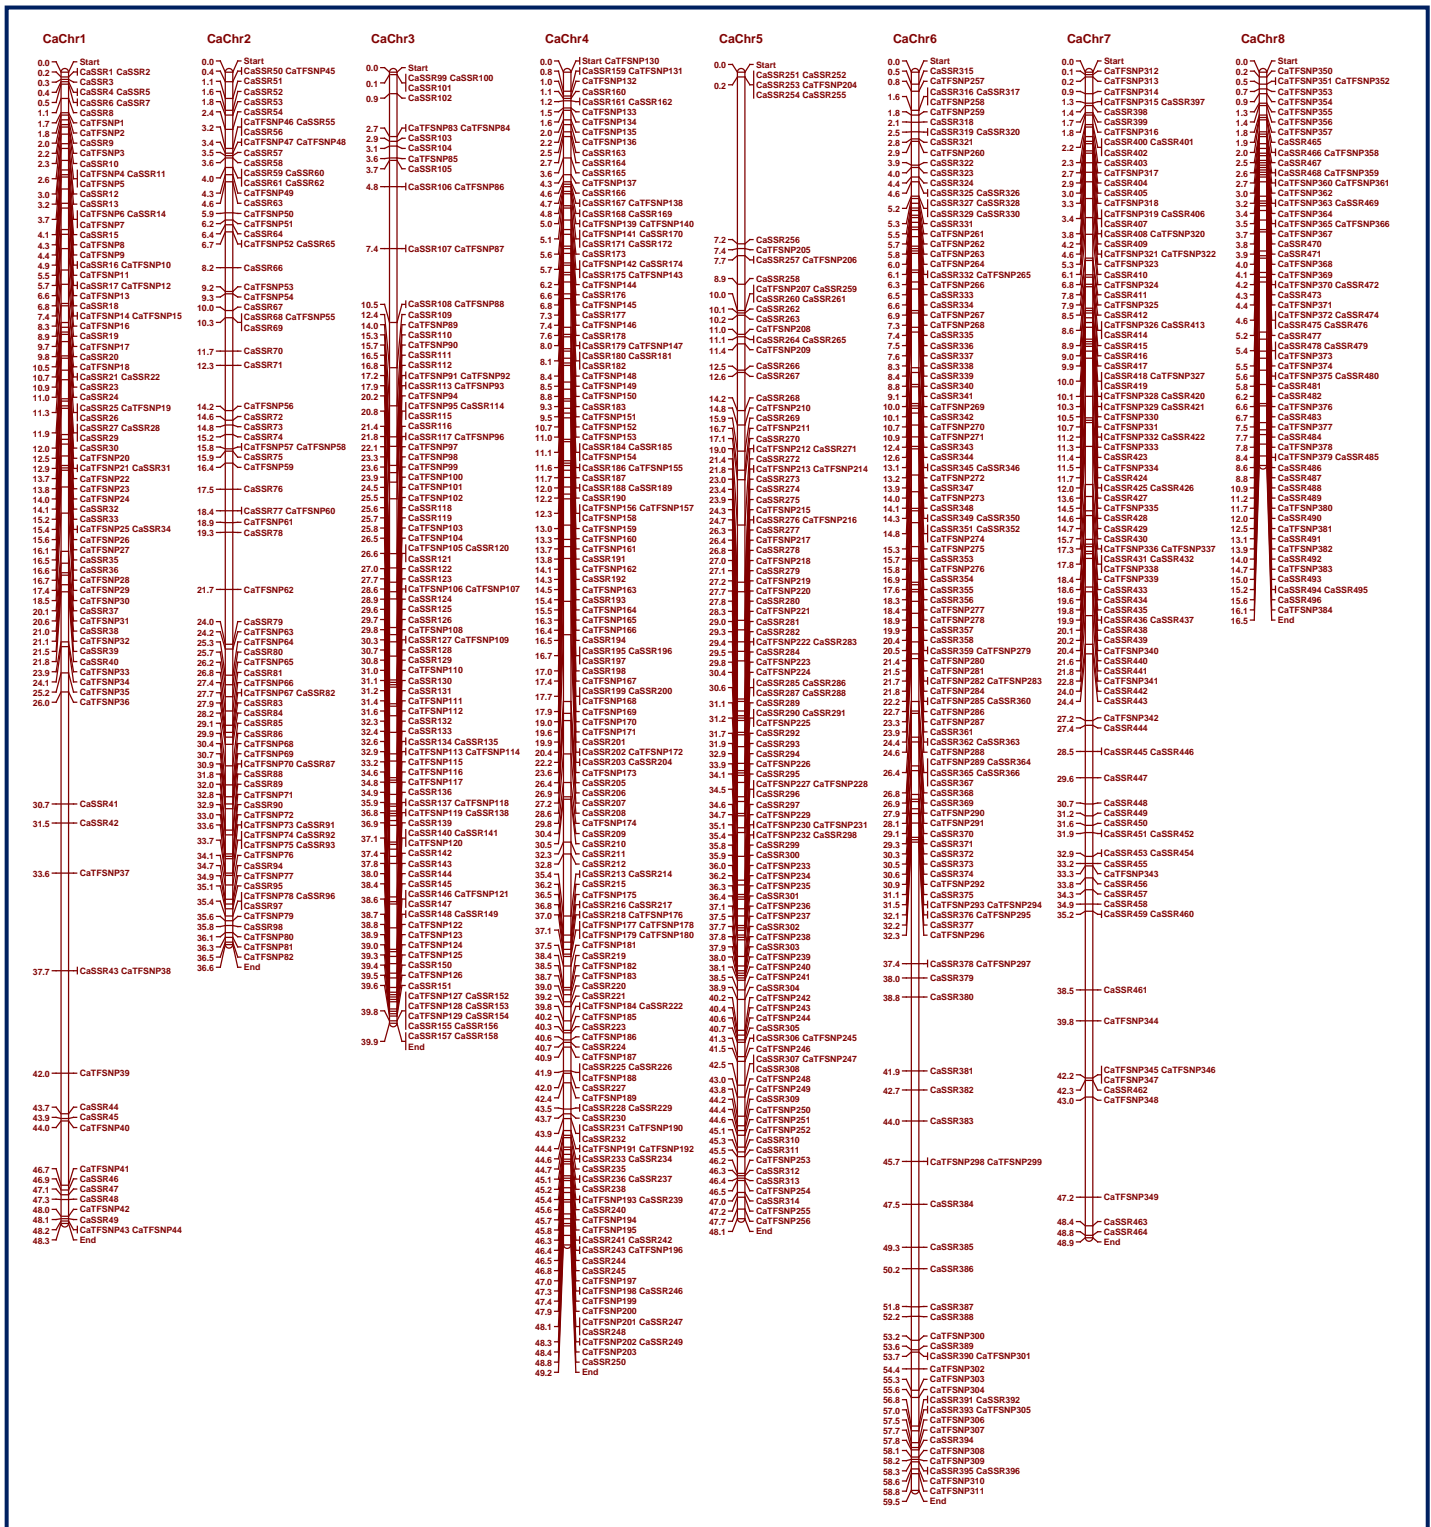

**Supplementary Fig. S1:** A physical map of chickpea constructed using 880 markers (including 496 genic and genomic SSR markers and 384 TF gene-based SNP markers) showing their genome-wide physical distribution over eight chickpea chromosomes. The physical distance (Mb) and identity of the marker loci integrated on the eight chromosomes are indicated on the left and right side of the chromosomes, respectively. The identity of markers mentioned on the right side of chromosomes that corresponds to the marker IDs “CaSSR” and “CaTFSNP” as mentioned details in the Supplementary Table S3 and S4. The size of the chromosomes (Mb) is based on the draft genome sequence (Pseudomolecule V1.1) of *kabuli* chickpea [Varshney et al. (43)].

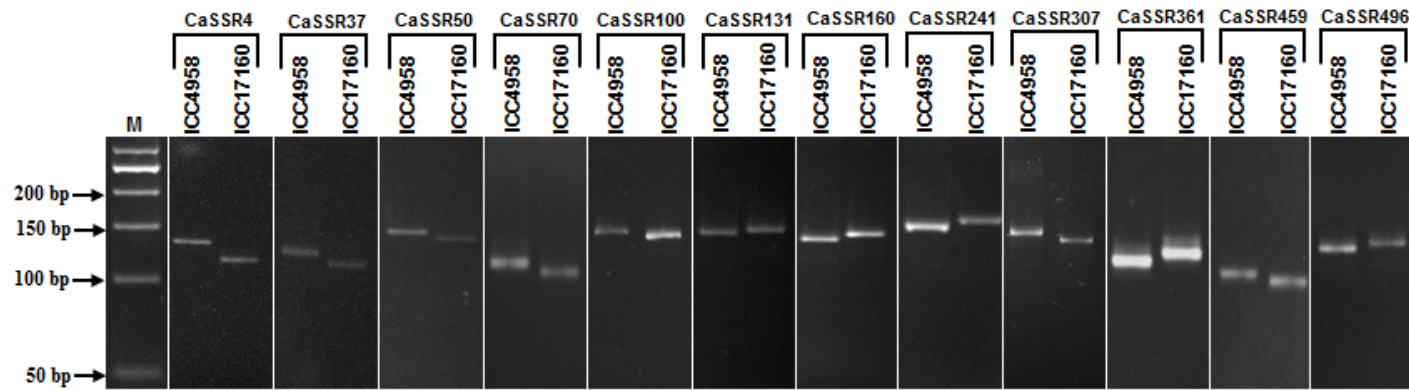

A

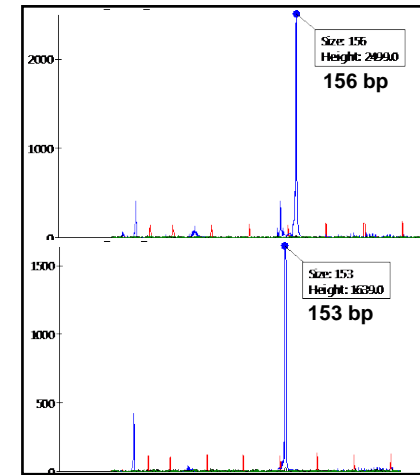

B

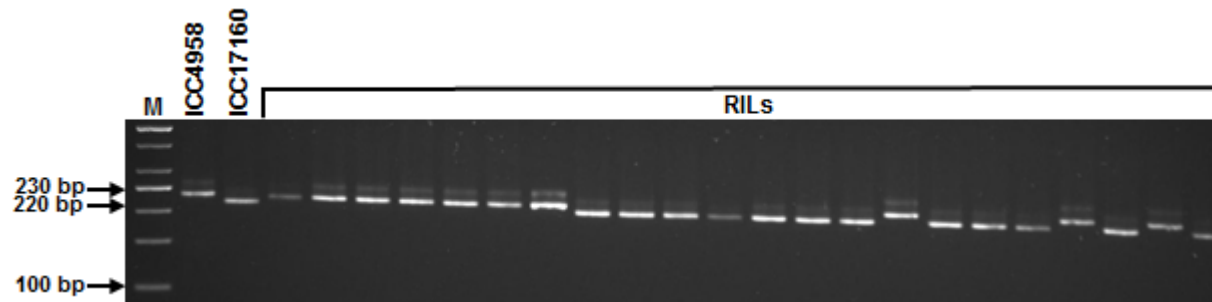

C

**Supplementary Fig. S2:** Validation of a representative set of 12 SSR markers (physically mapped across eight chickpea chromosomes) showing *in silico* fragment length polymorphism between parental accessions (ICC 4958 and ICC 17160) of a RIL mapping population (ICC 4958 x ICC 17160) using the gel-based assay (A) and fluorescent-dye labeled automated fragment analyzer (B). (C) The segregation pattern of one selected SSR marker in a representative set of RIL mapping individuals. The fragment sizes (bp) of the amplified polymorphic alleles are indicated. The identities of SSR markers with their detailed information are provided in the Supplementary Table S3. M: 50 bp DNA ladder size standard.

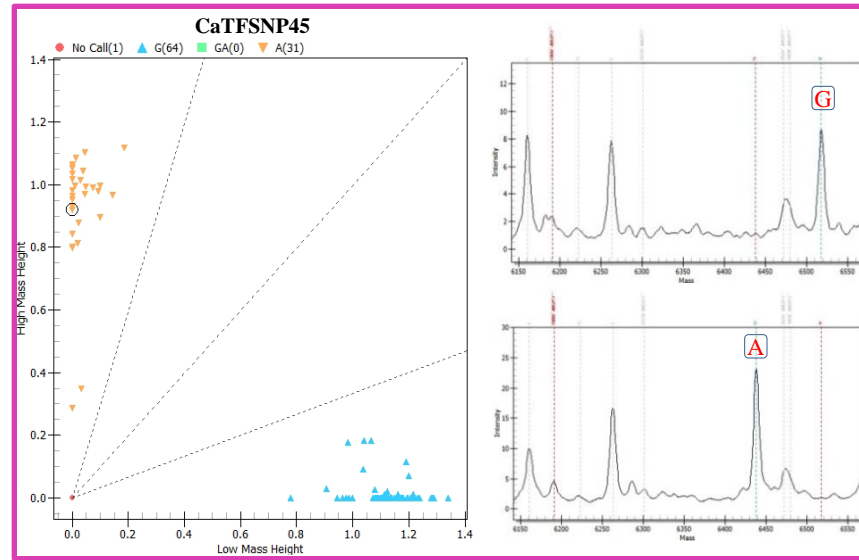

**Supplementary Fig. S3:** Call cluster plots for one representative SNP (G/A) demonstrating the genotyping information of parental accessions (ICC 4958 and ICC 17160) and RILs assayed with MALDI-TOF mass array. Distinct differentiation of homozygous and heterozygous SNPs based on mass differences of corresponding SNP alleles are evident.

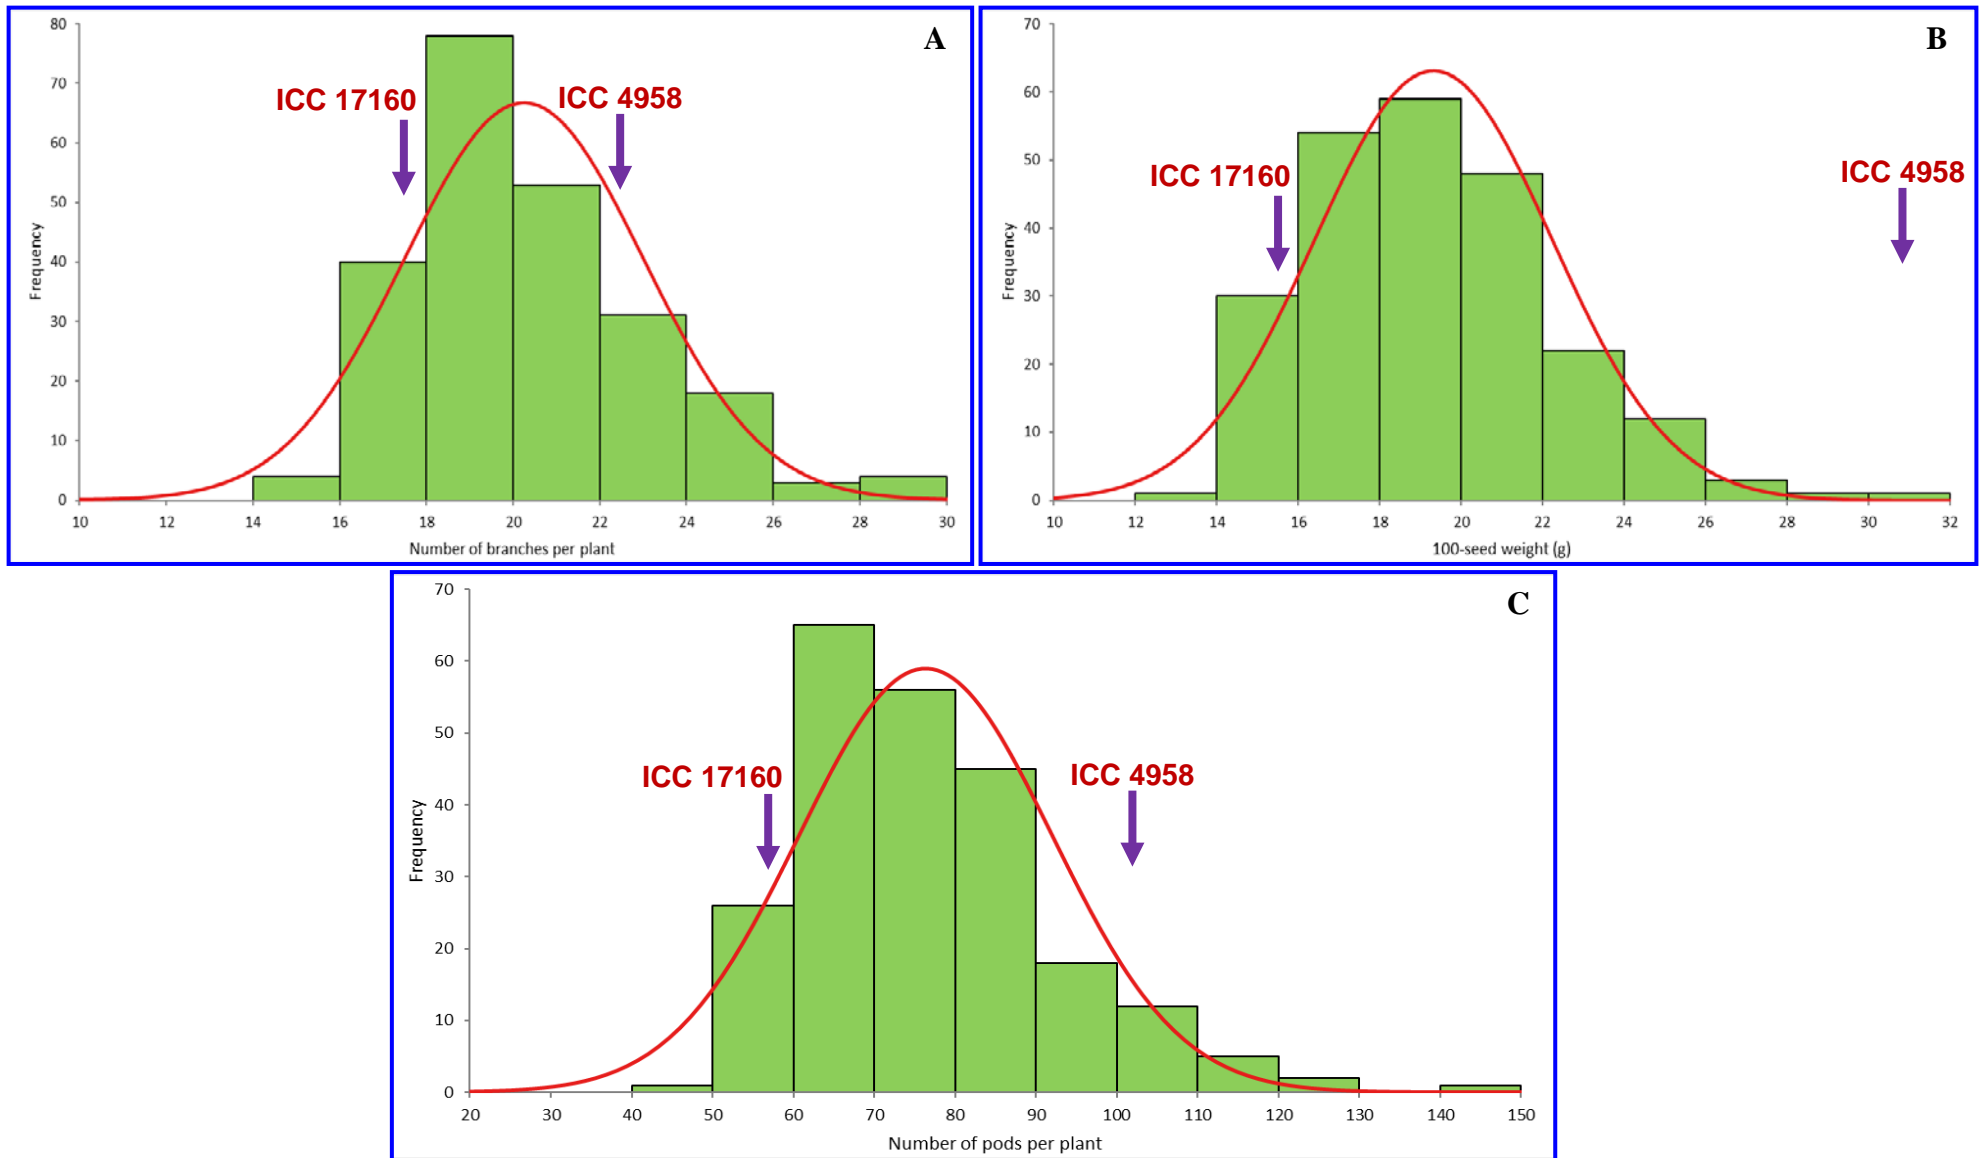

**Supplementary Fig. S4:** Frequency distribution of three quantitative agronomic traits, namely number of branches per plant (A), 100-seed weight (B) and number of pods per plant (C) in 229 RIL mapping individuals (ICC 4958 x ICC 17160) along with parental accessions depicted a goodness of fit to the normal distribution.

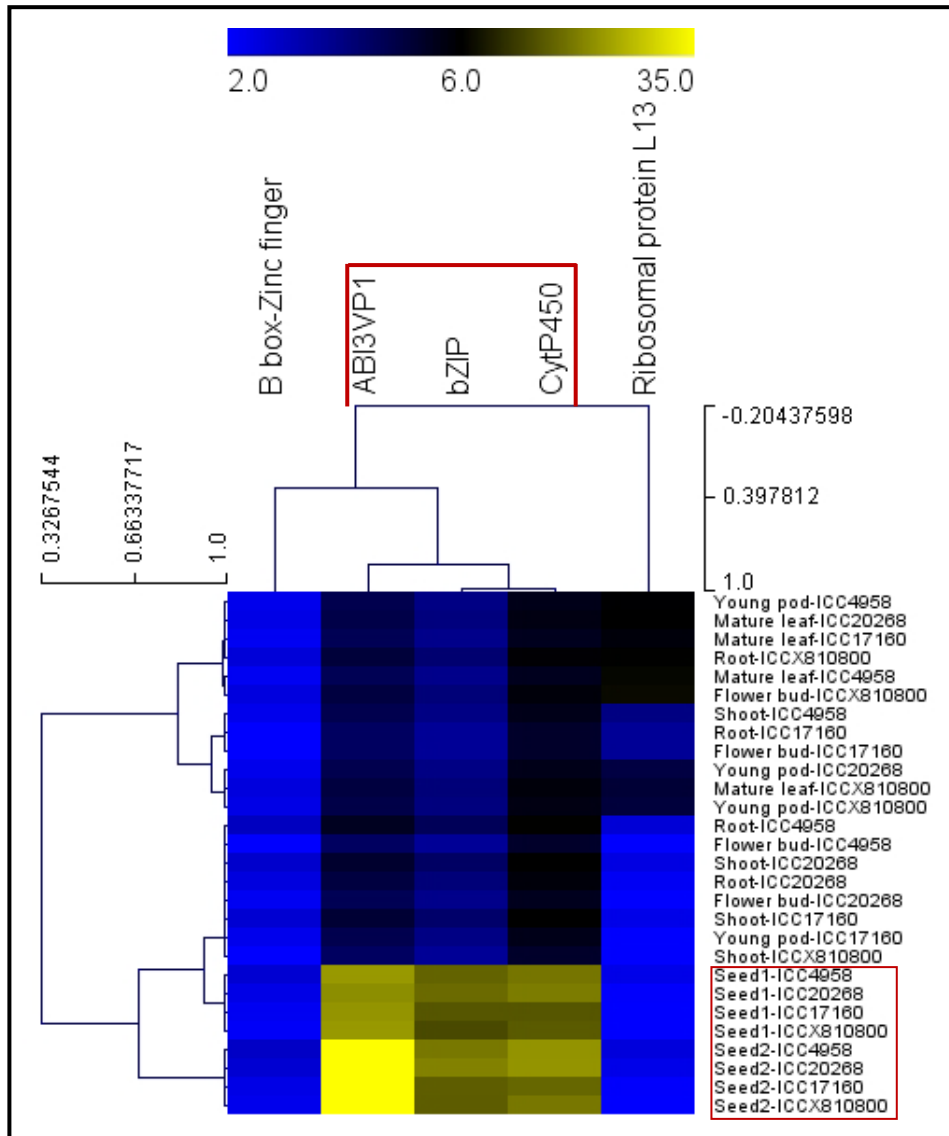

**Supplementary Fig. S5:** Hierarchical cluster display represented expression profiles for five protein-coding genes differentially expressed in five different vegetative and reproductive tissues and two seed developmental stages of low and high seed weight mapping parents (ICC 4958 and ICC 17160) and contrasting accessions (ICCX-810800 and ICC 20268). The colour scale at the top represents average log signal expression values of genes in various tissues and developmental stages; in which blue, black and yellow color signify low, medium and high level of expression, respectively. The tissues and genes used for expression profiling are mentioned on the right and top side of expression map, respectively. Three seed-specific genes showing higher differential expression in four chickpea accessions during seed development are highlighted with red boxes.

**Supplementary Table S1: Chickpea accessions (244 accessions) selected from Kujur et al. (37) for QTL-region specific association mapping**

| Sl. No. | Accession No. | Cultivars     | Geographical origin                 | Inferred population ancestry       |
|---------|---------------|---------------|-------------------------------------|------------------------------------|
| 1       | ICC3421       | <i>Kabuli</i> | Israel                              | <i>Kabuli</i> (Population Group I) |
| 2       | ICC9402       | <i>Kabuli</i> | Iran                                | <i>Kabuli</i> (Population Group I) |
| 3       | ICC13764      | <i>Kabuli</i> | Iran                                | <i>Kabuli</i> (Population Group I) |
| 4       | ICC12037      | <i>Kabuli</i> | Mexico                              | <i>Kabuli</i> (Population Group I) |
| 5       | ICC12492      | <i>Kabuli</i> | India                               | <i>Kabuli</i> (Population Group I) |
| 6       | ICC13441      | <i>Kabuli</i> | Iran                                | <i>Kabuli</i> (Population Group I) |
| 7       | ICC8855       | <i>Kabuli</i> | Afghanistan                         | <i>Kabuli</i> (Population Group I) |
| 8       | ICC9862       | <i>Kabuli</i> | Afghanistan                         | <i>Kabuli</i> (Population Group I) |
| 9       | ICC13461      | <i>Kabuli</i> | Iran                                | <i>Kabuli</i> (Population Group I) |
| 10      | ICC13628      | <i>Kabuli</i> | Iran                                | <i>Kabuli</i> (Population Group I) |
| 11      | ICC13523      | <i>Kabuli</i> | Iran                                | <i>Kabuli</i> (Population Group I) |
| 12      | ICC13187      | <i>Kabuli</i> | Iran                                | <i>Kabuli</i> (Population Group I) |
| 13      | ICC15802      | <i>Kabuli</i> | Syrian Arab Republic                | <i>Kabuli</i> (Population Group I) |
| 14      | ICC13077      | <i>Kabuli</i> | India                               | <i>Kabuli</i> (Population Group I) |
| 15      | ICC5337       | <i>Kabuli</i> | India                               | <i>Kabuli</i> (Population Group I) |
| 16      | ICC4841       | <i>Kabuli</i> | Morocco                             | <i>Kabuli</i> (Population Group I) |
| 17      | ICC7571       | <i>Kabuli</i> | Israel                              | <i>Kabuli</i> (Population Group I) |
| 18      | ICC15264      | <i>Kabuli</i> | Iran                                | <i>Kabuli</i> (Population Group I) |
| 19      | ICC7308       | <i>Kabuli</i> | Peru                                | <i>Kabuli</i> (Population Group I) |
| 20      | ICC2277       | <i>Kabuli</i> | Iran                                | <i>Kabuli</i> (Population Group I) |
| 21      | ICC6263       | <i>Kabuli</i> | Union of Soviet Socialist Republics | <i>Kabuli</i> (Population Group I) |
| 22      | ICC8740       | <i>Kabuli</i> | Afghanistan                         | <i>Kabuli</i> (Population Group I) |
| 23      | ICC13357      | <i>Kabuli</i> | Iran                                | <i>Kabuli</i> (Population Group I) |
| 24      | ICC7255       | <i>Kabuli</i> | India                               | <i>Kabuli</i> (Population Group I) |
| 25      | ICC7272       | <i>Kabuli</i> | Algeria                             | <i>Kabuli</i> (Population Group I) |
| 26      | ICC15435      | <i>Kabuli</i> | Morocco                             | <i>Kabuli</i> (Population Group I) |
| 27      | ICC11764      | <i>Kabuli</i> | Chile                               | <i>Kabuli</i> (Population Group I) |
| 28      | ICC15697      | <i>Kabuli</i> | Syria                               | <i>Kabuli</i> (Population Group I) |
| 29      | ICC13816      | <i>Kabuli</i> | Union of Soviet Socialist Republics | <i>Kabuli</i> (Population Group I) |
| 30      | ICC7668       | <i>Kabuli</i> | Union of Soviet Socialist Republics | <i>Kabuli</i> (Population Group I) |
| 31      | ICC13283      | <i>Kabuli</i> | Iran                                | <i>Kabuli</i> (Population Group I) |
| 32      | ICC7295       | <i>Kabuli</i> | Tunisia                             | <i>Kabuli</i> (Population Group I) |
| 33      | ICC12328      | <i>Kabuli</i> | Cyprus                              | <i>Kabuli</i> (Population Group I) |
| 34      | ICC7315       | <i>Kabuli</i> | Iran                                | <i>Kabuli</i> (Population Group I) |
| 35      | ICC11879      | <i>Kabuli</i> | Turkey                              | <i>Kabuli</i> (Population Group I) |
| 36      | ICC14446      | <i>Kabuli</i> | Italy                               | <i>Kabuli</i> (Population Group I) |
| 37      | ICC10755      | <i>Kabuli</i> | Turkey                              | <i>Kabuli</i> (Population Group I) |
| 38      | ICC14190      | <i>Kabuli</i> | India                               | <i>Kabuli</i> (Population Group I) |
| 39      | ICC15333      | <i>Kabuli</i> | Iran                                | <i>Kabuli</i> (Population Group I) |
| 40      | ICC8042       | <i>Kabuli</i> | Iran                                | <i>Kabuli</i> (Population Group I) |
| 41      | ICC8261       | <i>Kabuli</i> | Turkey                              | <i>Kabuli</i> (Population Group I) |
| 42      | ICC10885      | <i>Kabuli</i> | Ethiopia                            | <i>Kabuli</i> (Population Group I) |

| <b>Sl. No.</b> | <b>Accession No.</b> | <b>Cultivars</b> | <b>Geographical origin</b> | <b>Inferred population ancestry</b> |
|----------------|----------------------|------------------|----------------------------|-------------------------------------|
| 43             | ICC8058              | <i>Kabuli</i>    | Iran                       | <i>Kabuli</i> (Population Group I)  |
| 44             | ICC15512             | <i>Kabuli</i>    | Morocco                    | <i>Kabuli</i> (Population Group I)  |
| 45             | ICC9137              | <i>Kabuli</i>    | Iran                       | <i>Kabuli</i> (Population Group I)  |
| 46             | ICC15406             | <i>Kabuli</i>    | Morocco                    | <i>Kabuli</i> (Population Group I)  |
| 47             | ICC10884             | <i>Kabuli</i>    | Ethiopia                   | <i>Kabuli</i> (Population Group I)  |
| 48             | ICC15551             | <i>Kabuli</i>    | Australia                  | <i>Kabuli</i> (Population Group I)  |
| 49             | ICC15725             | <i>Kabuli</i>    | Syrian Arab Republic       | <i>Kabuli</i> (Population Group I)  |
| 50             | ICC6204              | <i>Kabuli</i>    | Spain                      | <i>Kabuli</i> (Population Group I)  |
| 51             | ICC6210              | <i>Kabuli</i>    | Spain                      | <i>Kabuli</i> (Population Group I)  |
| 52             | ICC11847             | <i>Kabuli</i>    | Chile                      | <i>Kabuli</i> (Population Group I)  |
| 53             | ICC7654              | <i>Kabuli</i>    | Turkey                     | <i>Kabuli</i> (Population Group I)  |
| 54             | ICC11749             | <i>Kabuli</i>    | Chile                      | <i>Kabuli</i> (Population Group I)  |
| 55             | ICC14199             | <i>Kabuli</i>    | Mexico                     | <i>Kabuli</i> (Population Group I)  |
| 56             | ICC15518             | <i>Kabuli</i>    | Morocco                    | <i>Kabuli</i> (Population Group I)  |
| 57             | ICC16814             | <i>Kabuli</i>    | Portugal                   | <i>Kabuli</i> (Population Group I)  |
| 58             | ICC16796             | <i>Kabuli</i>    | Portugal                   | <i>Kabuli</i> (Population Group I)  |
| 59             | ICC16811             | <i>Kabuli</i>    | India                      | <i>Kabuli</i> (Population Group I)  |
| 60             | ICC6253              | <i>Kabuli</i>    | Morocco                    | <i>Kabuli</i> (Population Group I)  |
| 61             | ICC11301             | <i>Kabuli</i>    | USA                        | <i>Kabuli</i> (Population Group I)  |
| 62             | ICC10749             | <i>Kabuli</i>    | Turkey                     | <i>Kabuli</i> (Population Group I)  |
| 63             | ICC14216             | <i>Kabuli</i>    | Mexico                     | <i>Kabuli</i> (Population Group I)  |
| 64             | ICC14203             | <i>Kabuli</i>    | Mexico                     | <i>Kabuli</i> (Population Group I)  |
| 65             | ICC11742             | <i>Kabuli</i>    | Chile                      | <i>Kabuli</i> (Population Group I)  |
| 66             | ICC13821             | <i>Kabuli</i>    | Ethiopia                   | <i>Kabuli</i> (Population Group I)  |
| 67             | ICC14462             | <i>Kabuli</i>    | USA                        | <i>Kabuli</i> (Population Group I)  |
| 68             | ICC14220             | <i>Kabuli</i>    | Kenya                      | <i>Kabuli</i> (Population Group I)  |
| 69             | ICC15944             | <i>Kabuli</i>    | USA                        | <i>Kabuli</i> (Population Group I)  |
| 70             | ICC11303             | <i>Kabuli</i>    | Chile                      | <i>Kabuli</i> (Population Group I)  |
| 71             | ICC12034             | <i>Kabuli</i>    | Mexico                     | <i>Kabuli</i> (Population Group I)  |
| 72             | ICC7346              | <i>Kabuli</i>    | Mexico                     | <i>Kabuli</i> (Population Group I)  |
| 73             | ICC15994             | <i>Kabuli</i>    | Spain                      | <i>Kabuli</i> (Population Group I)  |
| 74             | ICC18591             | <i>Kabuli</i>    | Mexico                     | <i>Kabuli</i> (Population Group I)  |
| 75             | ICC8155              | <i>Kabuli</i>    | USA                        | <i>Kabuli</i> (Population Group I)  |
| 76             | ICC8151              | <i>Kabuli</i>    | USA                        | <i>Kabuli</i> (Population Group I)  |
| 77             | ICC20268             | <i>Kabuli</i>    | India                      | <i>Kabuli</i> (Population Group I)  |
| 78             | ICCX-810800          | <i>Desi</i>      | India                      | <i>Desi</i> (Population Group II)   |
| 79             | ICC5590              | <i>Desi</i>      | India                      | <i>Desi</i> (Population Group II)   |
| 80             | ICC6013              | <i>Desi</i>      | India                      | <i>Desi</i> (Population Group II)   |
| 81             | ICC5002              | <i>Desi</i>      | India                      | <i>Desi</i> (Population Group II)   |
| 82             | ICC3362              | <i>Desi</i>      | Iran                       | <i>Desi</i> (Population Group II)   |
| 83             | ICC7184              | <i>Desi</i>      | Turkey                     | <i>Desi</i> (Population Group II)   |
| 84             | ICC3946              | <i>Desi</i>      | Iran                       | <i>Desi</i> (Population Group II)   |
| 85             | ICC4926              | <i>Desi</i>      | India                      | <i>Desi</i> (Population Group II)   |
| 86             | ICC12299             | <i>Desi</i>      | Nepal                      | <i>Desi</i> (Population Group II)   |

| Sl. No. | Accession No. | Cultivars   | Geographical origin | Inferred population ancestry      |
|---------|---------------|-------------|---------------------|-----------------------------------|
| 87      | ICC4657       | <i>Desi</i> | India               | <i>Desi</i> (Population Group II) |
| 88      | ICC12824      | <i>Desi</i> | Ethiopia            | <i>Desi</i> (Population Group II) |
| 89      | ICC1052       | <i>Desi</i> | Pakistan            | <i>Desi</i> (Population Group II) |
| 90      | ICC3761       | <i>Desi</i> | Iran                | <i>Desi</i> (Population Group II) |
| 91      | ICC5878       | <i>Desi</i> | India               | <i>Desi</i> (Population Group II) |
| 92      | ICC456        | <i>Desi</i> | India               | <i>Desi</i> (Population Group II) |
| 93      | ICC5135       | <i>Desi</i> | India               | <i>Desi</i> (Population Group II) |
| 94      | ICC16207      | <i>Desi</i> | Myanmar             | <i>Desi</i> (Population Group II) |
| 95      | ICC12537      | <i>Desi</i> | Ethiopia            | <i>Desi</i> (Population Group II) |
| 96      | ICC12654      | <i>Desi</i> | Ethiopia            | <i>Desi</i> (Population Group II) |
| 97      | ICC12726      | <i>Desi</i> | Ethiopia            | <i>Desi</i> (Population Group II) |
| 98      | ICC11944      | <i>Desi</i> | Nepal               | <i>Desi</i> (Population Group II) |
| 99      | ICC12866      | <i>Desi</i> | Ethiopia            | <i>Desi</i> (Population Group II) |
| 100     | ICC4814       | <i>Desi</i> | Iran                | <i>Desi</i> (Population Group II) |
| 101     | ICC6293       | <i>Desi</i> | Italy               | <i>Desi</i> (Population Group II) |
| 102     | ICC3776       | <i>Desi</i> | Iran                | <i>Desi</i> (Population Group II) |
| 103     | ICC4418       | <i>Desi</i> | Iran                | <i>Desi</i> (Population Group II) |
| 104     | ICC4463       | <i>Desi</i> | Iran                | <i>Desi</i> (Population Group II) |
| 105     | ICC12916      | <i>Desi</i> | India               | <i>Desi</i> (Population Group II) |
| 106     | ICC11627      | <i>Desi</i> | India               | <i>Desi</i> (Population Group II) |
| 107     | ICC8607       | <i>Desi</i> | Ethiopia            | <i>Desi</i> (Population Group II) |
| 108     | ICC11498      | <i>Desi</i> | India               | <i>Desi</i> (Population Group II) |
| 109     | ICC12928      | <i>Desi</i> | India               | <i>Desi</i> (Population Group II) |
| 110     | ICC12947      | <i>Desi</i> | India               | <i>Desi</i> (Population Group II) |
| 111     | ICC4182       | <i>Desi</i> | Iran                | <i>Desi</i> (Population Group II) |
| 112     | ICC5845       | <i>Desi</i> | India               | <i>Desi</i> (Population Group II) |
| 113     | ICC9942       | <i>Desi</i> | India               | <i>Desi</i> (Population Group II) |
| 114     | ICC16261      | <i>Desi</i> | Malawi              | <i>Desi</i> (Population Group II) |
| 115     | ICC2629       | <i>Desi</i> | Iran                | <i>Desi</i> (Population Group II) |
| 116     | ICC6571       | <i>Desi</i> | Iran                | <i>Desi</i> (Population Group II) |
| 117     | ICC762        | <i>Desi</i> | India               | <i>Desi</i> (Population Group II) |
| 118     | ICC3218       | <i>Desi</i> | Iran                | <i>Desi</i> (Population Group II) |
| 119     | ICC3325       | <i>Desi</i> | Cyprus              | <i>Desi</i> (Population Group II) |
| 120     | ICC11584      | <i>Desi</i> | India               | <i>Desi</i> (Population Group II) |
| 121     | ICC1392       | <i>Desi</i> | India               | <i>Desi</i> (Population Group II) |
| 122     | ICC3631       | <i>Desi</i> | Iran                | <i>Desi</i> (Population Group II) |
| 123     | ICC14402      | <i>Desi</i> | India               | <i>Desi</i> (Population Group II) |
| 124     | ICC2242       | <i>Desi</i> | India               | <i>Desi</i> (Population Group II) |
| 125     | ICC11664      | <i>Desi</i> | India               | <i>Desi</i> (Population Group II) |
| 126     | ICC15868      | <i>Desi</i> | India               | <i>Desi</i> (Population Group II) |
| 127     | ICC1710       | <i>Desi</i> | India               | <i>Desi</i> (Population Group II) |
| 128     | ICC791        | <i>Desi</i> | India               | <i>Desi</i> (Population Group II) |
| 129     | ICC2072       | <i>Desi</i> | India               | <i>Desi</i> (Population Group II) |
| 130     | ICC13524      | <i>Desi</i> | Iran                | <i>Desi</i> (Population Group II) |



| Sl. No. | Accession No. | Cultivars   | Geographical origin | Inferred population ancestry      |
|---------|---------------|-------------|---------------------|-----------------------------------|
| 131     | ICC2507       | <i>Desi</i> | Iran                | <i>Desi</i> (Population Group II) |
| 132     | ICC440        | <i>Desi</i> | India               | <i>Desi</i> (Population Group II) |
| 133     | ICC2065       | <i>Desi</i> | India               | <i>Desi</i> (Population Group II) |
| 134     | ICC9586       | <i>Desi</i> | India               | <i>Desi</i> (Population Group II) |
| 135     | ICC13863      | <i>Desi</i> | Ethiopia            | <i>Desi</i> (Population Group II) |
| 136     | ICC14077      | <i>Desi</i> | Ethiopia            | <i>Desi</i> (Population Group II) |
| 137     | ICC16487      | <i>Desi</i> | Pakistan            | <i>Desi</i> (Population Group II) |
| 138     | ICC1161       | <i>Desi</i> | Pakistan            | <i>Desi</i> (Population Group II) |
| 139     | ICC6537       | <i>Desi</i> | Iran                | <i>Desi</i> (Population Group II) |
| 140     | ICC9737       | <i>Desi</i> | India               | <i>Desi</i> (Population Group II) |
| 141     | ICC2263       | <i>Desi</i> | Iran                | <i>Desi</i> (Population Group II) |
| 142     | ICC6874       | <i>Desi</i> | Iran                | <i>Desi</i> (Population Group II) |
| 143     | ICC10945      | <i>Desi</i> | India               | <i>Desi</i> (Population Group II) |
| 144     | ICC13892      | <i>Desi</i> | Ethiopia            | <i>Desi</i> (Population Group II) |
| 145     | ICC15618      | <i>Desi</i> | India               | <i>Desi</i> (Population Group II) |
| 146     | ICC9002       | <i>Desi</i> | Iran                | <i>Desi</i> (Population Group II) |
| 147     | ICC16269      | <i>Desi</i> | Malawi              | <i>Desi</i> (Population Group II) |
| 148     | ICC2210       | <i>Desi</i> | Algeria             | <i>Desi</i> (Population Group II) |
| 149     | ICC14051      | <i>Desi</i> | Ethiopia            | <i>Desi</i> (Population Group II) |
| 150     | ICC6811       | <i>Desi</i> | Iran                | <i>Desi</i> (Population Group II) |
| 151     | ICC9643       | <i>Desi</i> | Afghanistan         | <i>Desi</i> (Population Group II) |
| 152     | ICC12307      | <i>Desi</i> | Myanmar             | <i>Desi</i> (Population Group II) |
| 153     | ICC14778      | <i>Desi</i> | India               | <i>Desi</i> (Population Group II) |
| 154     | ICC8195       | <i>Desi</i> | Pakistan            | <i>Desi</i> (Population Group II) |
| 155     | ICC1715       | <i>Desi</i> | India               | <i>Desi</i> (Population Group II) |
| 156     | ICC4495       | <i>Desi</i> | Turkey              | <i>Desi</i> (Population Group II) |
| 157     | ICC11378      | <i>Desi</i> | India               | <i>Desi</i> (Population Group II) |
| 158     | ICC1431       | <i>Desi</i> | India               | <i>Desi</i> (Population Group II) |
| 159     | ICC7441       | <i>Desi</i> | India               | <i>Desi</i> (Population Group II) |
| 160     | ICC12155      | <i>Desi</i> | Bangladesh          | <i>Desi</i> (Population Group II) |
| 161     | ICC2884       | <i>Desi</i> | Iran                | <i>Desi</i> (Population Group II) |
| 162     | ICC15606      | <i>Desi</i> | India               | <i>Desi</i> (Population Group II) |
| 163     | ICC8950       | <i>Desi</i> | India               | <i>Desi</i> (Population Group II) |
| 164     | ICC12851      | <i>Desi</i> | Ethiopia            | <i>Desi</i> (Population Group II) |
| 165     | ICC6816       | <i>Desi</i> | Iran                | <i>Desi</i> (Population Group II) |
| 166     | ICC10393      | <i>Desi</i> | India               | <i>Desi</i> (Population Group II) |
| 167     | ICC11198      | <i>Desi</i> | India               | <i>Desi</i> (Population Group II) |
| 168     | ICC6579       | <i>Desi</i> | Iran                | <i>Desi</i> (Population Group II) |
| 169     | ICC67         | <i>Desi</i> | India               | <i>Desi</i> (Population Group II) |
| 170     | ICC1923       | <i>Desi</i> | India               | <i>Desi</i> (Population Group II) |
| 171     | ICC2720       | <i>Desi</i> | Iran                | <i>Desi</i> (Population Group II) |
| 172     | ICC4567       | <i>Desi</i> | India               | <i>Desi</i> (Population Group II) |
| 173     | ICC637        | <i>Desi</i> | India               | <i>Desi</i> (Population Group II) |
| 174     | ICC1882       | <i>Desi</i> | India               | <i>Desi</i> (Population Group II) |

| Sl. No. | Accession No. | Cultivars   | Geographical origin                 | Inferred population ancestry      |
|---------|---------------|-------------|-------------------------------------|-----------------------------------|
| 175     | ICC5639       | <i>Desi</i> | India                               | <i>Desi</i> (Population Group II) |
| 176     | ICC8384       | <i>Desi</i> | India                               | <i>Desi</i> (Population Group II) |
| 177     | ICC95         | <i>Desi</i> | India                               | <i>Desi</i> (Population Group II) |
| 178     | ICC1098       | <i>Desi</i> | Iran                                | <i>Desi</i> (Population Group II) |
| 179     | ICC708        | <i>Desi</i> | India                               | <i>Desi</i> (Population Group II) |
| 180     | ICC14098      | <i>Desi</i> | Ethiopia                            | <i>Desi</i> (Population Group II) |
| 181     | ICC1083       | <i>Desi</i> | Iran                                | <i>Desi</i> (Population Group II) |
| 182     | ICC1164       | <i>Desi</i> | Nigeria                             | <i>Desi</i> (Population Group II) |
| 183     | ICC1205       | <i>Desi</i> | India                               | <i>Desi</i> (Population Group II) |
| 184     | ICC14831      | <i>Desi</i> | India                               | <i>Desi</i> (Population Group II) |
| 185     | ICC5434       | <i>Desi</i> | India                               | <i>Desi</i> (Population Group II) |
| 186     | ICC10399      | <i>Desi</i> | India                               | <i>Desi</i> (Population Group II) |
| 187     | ICC4593       | <i>Desi</i> | India                               | <i>Desi</i> (Population Group II) |
| 188     | ICC11121      | <i>Desi</i> | India                               | <i>Desi</i> (Population Group II) |
| 189     | ICC15612      | <i>Desi</i> | Tanzania                            | <i>Desi</i> (Population Group II) |
| 190     | ICC3230       | <i>Desi</i> | Iran                                | <i>Desi</i> (Population Group II) |
| 191     | ICC867        | <i>Desi</i> | India                               | <i>Desi</i> (Population Group II) |
| 192     | ICC16915      | <i>Desi</i> | India                               | <i>Desi</i> (Population Group II) |
| 193     | ICC6802       | <i>Desi</i> | Iran                                | <i>Desi</i> (Population Group II) |
| 194     | ICC14815      | <i>Desi</i> | India                               | <i>Desi</i> (Population Group II) |
| 195     | ICC1356       | <i>Desi</i> | India                               | <i>Desi</i> (Population Group II) |
| 196     | ICC13219      | <i>Desi</i> | Iran                                | <i>Desi</i> (Population Group II) |
| 197     | ICC1422       | <i>Desi</i> | India                               | <i>Desi</i> (Population Group II) |
| 198     | ICC5613       | <i>Desi</i> | India                               | <i>Desi</i> (Population Group II) |
| 199     | ICC14799      | <i>Desi</i> | India                               | <i>Desi</i> (Population Group II) |
| 200     | ICC2969       | <i>Desi</i> | Iran                                | <i>Desi</i> (Population Group II) |
| 201     | ICC1194       | <i>Desi</i> | India                               | <i>Desi</i> (Population Group II) |
| 202     | ICC15567      | <i>Desi</i> | India                               | <i>Desi</i> (Population Group II) |
| 203     | ICC506        | <i>Desi</i> | India                               | <i>Desi</i> (Population Group II) |
| 204     | ICC11284      | <i>Desi</i> | Union of Soviet Socialist Republics | <i>Desi</i> (Population Group II) |
| 205     | ICC4639       | <i>Desi</i> | India                               | <i>Desi</i> (Population Group II) |
| 206     | ICC8621       | <i>Desi</i> | Ethiopia                            | <i>Desi</i> (Population Group II) |
| 207     | ICC2580       | <i>Desi</i> | Iran                                | <i>Desi</i> (Population Group II) |
| 208     | ICC283        | <i>Desi</i> | India                               | <i>Desi</i> (Population Group II) |
| 209     | ICC1180       | <i>Desi</i> | India                               | <i>Desi</i> (Population Group II) |
| 210     | ICC9755       | <i>Desi</i> | Afghanistan                         | <i>Desi</i> (Population Group II) |
| 211     | ICC1397       | <i>Desi</i> | India                               | <i>Desi</i> (Population Group II) |
| 212     | ICC14669      | <i>Desi</i> | India                               | <i>Desi</i> (Population Group II) |
| 213     | ICC3512       | <i>Desi</i> | Iran                                | <i>Desi</i> (Population Group II) |
| 214     | ICC1510       | <i>Desi</i> | India                               | <i>Desi</i> (Population Group II) |
| 215     | ICC2990       | <i>Desi</i> | Iran                                | <i>Desi</i> (Population Group II) |
| 216     | ICC7323       | <i>Desi</i> | Unknown                             | <i>Desi</i> (Population Group II) |
| 217     | ICC4533       | <i>Desi</i> | India                               | <i>Desi</i> (Population Group II) |
| 218     | ICC16903      | <i>Desi</i> | India                               | <i>Desi</i> (Population Group II) |

| <b>Sl. No.</b> | <b>Accession No.</b> | <b>Cultivars</b> | <b>Geographical origin</b>          | <b>Inferred population ancestry</b> |
|----------------|----------------------|------------------|-------------------------------------|-------------------------------------|
| 219            | ICC7867              | <i>Desi</i>      | Iran                                | <i>Desi</i> (Population Group II)   |
| 220            | ICC8522              | <i>Desi</i>      | Italy                               | <i>Desi</i> (Population Group II)   |
| 221            | ICC16374             | <i>Desi</i>      | Malawi                              | <i>Desi</i> (Population Group II)   |
| 222            | ICC12028             | <i>Desi</i>      | Mexico                              | <i>Desi</i> (Population Group II)   |
| 223            | ICC1230              | <i>Desi</i>      | India                               | <i>Desi</i> (Population Group II)   |
| 224            | ICC8318              | <i>Desi</i>      | India                               | <i>Desi</i> (Population Group II)   |
| 225            | ICC2919              | <i>Desi</i>      | Iran                                | <i>Desi</i> (Population Group II)   |
| 226            | ICC5504              | <i>Desi</i>      | Mexico                              | <i>Desi</i> (Population Group II)   |
| 227            | ICC5383              | <i>Desi</i>      | India                               | <i>Desi</i> (Population Group II)   |
| 228            | ICC15610             | <i>Desi</i>      | India                               | <i>Desi</i> (Population Group II)   |
| 229            | ICC1398              | <i>Desi</i>      | India                               | <i>Desi</i> (Population Group II)   |
| 230            | ICC14595             | <i>Desi</i>      | India                               | <i>Desi</i> (Population Group II)   |
| 231            | ICC13599             | <i>Desi</i>      | Iran                                | <i>Desi</i> (Population Group II)   |
| 232            | ICC15510             | <i>Desi</i>      | Morocco                             | <i>Desi</i> (Population Group II)   |
| 233            | ICC7554              | <i>Desi</i>      | Iran                                | <i>Desi</i> (Population Group II)   |
| 234            | ICC15294             | <i>Desi</i>      | Iran                                | <i>Desi</i> (Population Group II)   |
| 235            | ICC4918              | <i>Desi</i>      | India                               | <i>Desi</i> (Population Group II)   |
| 236            | ICC7819              | <i>Desi</i>      | Iran                                | <i>Desi</i> (Population Group II)   |
| 237            | ICC1915              | <i>Desi</i>      | India                               | <i>Desi</i> (Population Group II)   |
| 238            | ICC6279              | <i>Desi</i>      | India                               | <i>Desi</i> (Population Group II)   |
| 239            | ICC6306              | <i>Desi</i>      | Union of Soviet Socialist Republics | <i>Desi</i> (Population Group II)   |
| 240            | ICC16524             | <i>Desi</i>      | Pakistan                            | <i>Desi</i> (Population Group II)   |
| 241            | ICC6877              | <i>Desi</i>      | Iran                                | <i>Desi</i> (Population Group II)   |
| 242            | ICC1836              | <i>Desi</i>      | India                               | <i>Desi</i> (Population Group II)   |
| 243            | ICC15061             | <i>Desi</i>      | India                               | <i>Desi</i> (Population Group II)   |
| 244            | ICC13124             | <i>Desi</i>      | India                               | <i>Desi</i> (Population Group II)   |

**Supplementary Table S2: Chickpea accessions (81 accessions) selected from five wild species for gene haplotype-based LD mapping**

| Sl. No. | <i>Cicer</i> species    | Accession No. | Cultivar types | Geographical origin  |
|---------|-------------------------|---------------|----------------|----------------------|
| 1       | <i>C. reticulatum</i>   | ICC17160      | Wild           | Turkey               |
| 2       |                         | ILWC290       | Wild           | Turkey               |
| 3       |                         | ILWC233       | Wild           | Turkey               |
| 4       |                         | ILWC253       | Wild           | Turkey               |
| 5       |                         | ILWC254       | Wild           | Turkey               |
| 6       |                         | ILWC237       | Wild           | Turkey               |
| 7       |                         | ILWC257       | Wild           | Turkey               |
| 8       |                         | ILWC218       | Wild           | Turkey               |
| 9       |                         | ILWC247       | Wild           | Turkey               |
| 10      |                         | ILWC229       | Wild           | Turkey               |
| 11      |                         | ILWC219       | Wild           | Turkey               |
| 12      |                         | ILWC242       | Wild           | Turkey               |
| 13      |                         | ILWC258       | Wild           | Turkey               |
| 14      |                         | ILWC21        | Wild           | Turkey               |
| 15      |                         | ILWC36        | Wild           | Turkey               |
| 16      |                         | ILWC216       | Wild           | Turkey               |
| 17      | <i>C. echinospermum</i> | ICC17159      | Wild           | Turkey               |
| 18      |                         | ILWC35        | Wild           | Turkey               |
| 19      |                         | IG135418      | Wild           | Syrian Arab Republic |
| 20      |                         | ILWC239       | Wild           | Turkey               |
| 21      |                         | ILWC245       | Wild           | Turkey               |
| 22      |                         | ILWC238       | Wild           | Turkey               |
| 23      |                         | ILWC246       | Wild           | Turkey               |
| 24      |                         | ILWC288       | Wild           | Turkey               |
| 25      | <i>C. judaicum</i>      | ICC182        | Wild           | ICRISAT, India       |
| 26      |                         | ICC17150      | Wild           | Lebanon              |
| 27      |                         | ILWC95        | Wild           | ICRISAT, India       |
| 28      |                         | ILWC31        | Wild           | Jordan               |
| 29      |                         | ILWC185       | Wild           | ICRISAT, India       |
| 30      |                         | ICC17148      | Wild           | Lebanon              |
| 31      |                         | ILWC280       | Wild           | Syrian Arab Republic |
| 32      |                         | ILWC283       | Wild           | Syrian Arab Republic |
| 33      |                         | ILWC20        | Wild           | Israel               |
| 34      |                         | ILWC211       | Wild           | Syrian Arab Republic |
| 35      |                         | ILWC30        | Wild           | Israel               |
| 36      |                         | ILWC48        | Wild           | Syrian Arab Republic |
| 37      |                         | ILWC50        | Wild           | Syrian Arab Republic |
| 38      |                         | ILWC207       | Wild           | Syrian Arab Republic |
| 39      |                         | ILWC45        | Wild           | Syrian Arab Republic |
| 40      |                         | ILWC38        | Wild           | Lebanon              |
| 41      |                         | ILWC278       | Wild           | Syrian Arab Republic |

| Sl. No. | <i>Cicer</i> species   | Accession No. | Cultivar types | Geographical origin  |
|---------|------------------------|---------------|----------------|----------------------|
| 42      |                        | ILWC275       | Wild           | Lebanon              |
| 43      |                        | ILWC223       | Wild           | Lebanon              |
| 44      |                        | ILWC256       | Wild           | Jordan               |
| 45      |                        | ILWC273       | Wild           | Lebanon              |
| 46      |                        | ILWC4         | Wild           | Lebanon              |
| 47      |                        | ILWC42        | Wild           | Syrian Arab Republic |
| 48      |                        | IG136792      | Wild           | Syrian Arab Republic |
| 49      |                        | IG136786      | Wild           | Syrian Arab Republic |
| 50      |                        | ILWC277       | Wild           | Syrian Arab Republic |
| 51      |                        | ILWC8         | Wild           | Turkey               |
| 52      |                        | ILWC228       | Wild           | Turkey               |
| 53      |                        | ILWC240       | Wild           | Turkey               |
| 54      |                        | ILWC241       | Wild           | Turkey               |
| 55      |                        | ILWC260       | Wild           | Turkey               |
| 56      | <i>C. bijugum</i>      | ILWC217       | Wild           | Turkey               |
| 57      |                        | ILWC209       | Wild           | Syrian Arab Republic |
| 58      |                        | ILWC227       | Wild           | Turkey               |
| 59      |                        | ILWC284       | Wild           | Turkey               |
| 60      |                        | ILWC7         | Wild           | Turkey               |
| 61      |                        | ILWC220       | Wild           | Turkey               |
| 62      |                        | IG136796      | Wild           | Syrian Arab Republic |
| 63      |                        | ILWC285       | Wild           | Turkey               |
| 64      |                        | ILWC286       | Wild           | Turkey               |
| 65      |                        | ILWC32        | Wild           | Turkey               |
| 66      |                        | ILWC9         | Wild           | Turkey               |
| 67      |                        | ILWC22        | Wild           | Turkey               |
| 68      |                        | IG136820      | Wild           | Syrian Arab Republic |
| 69      |                        | ILWC251       | Wild           | Turkey               |
| 70      |                        | ILWC29        | Wild           | Turkey               |
| 71      |                        | ILWC33        | Wild           | Turkey               |
| 72      |                        | ILWC49        | Wild           | Syrian Arab Republic |
| 73      | <i>C. pinnatifidum</i> | ILWC226       | Wild           | Turkey               |
| 74      |                        | ILWC248       | Wild           | Turkey               |
| 75      |                        | ILWC249       | Wild           | Turkey               |
| 76      |                        | ILWC236       | Wild           | Turkey               |
| 77      |                        | ILWC225       | Wild           | Turkey               |
| 78      |                        | ILWC51        | Wild           | Turkey               |
| 79      |                        | ILWC250       | Wild           | Turkey               |
| 80      |                        | ILWC261       | Wild           | Syrian Arab Republic |
| 81      |                        | ILWC289       | Wild           | Turkey               |

**Supplementary Table S3: Summary of 496 genic and genomic SSR markers used for polymorphism survey between parental accessions (ICC 4958 and ICC 17160) of RIL mapping population employing gel-based assay and fluorescent dye-labelled automated fragment analyser**

| Marker IDs* | Microsatellite repeat-motifs | Forward Primer sequences (5'-3') | Reverse Primer sequences (5'-3') | Actual annealing temperature (OC) | Size (bp) of alleles amplified | Types of markers | Chromosomes | Physical positions (bp) | Putative functions                                                                 |
|-------------|------------------------------|----------------------------------|----------------------------------|-----------------------------------|--------------------------------|------------------|-------------|-------------------------|------------------------------------------------------------------------------------|
| CaSSR1      | (TTA)5                       | CCTCGCCAAATAATCTCAGG             | CCGAAGAGCAGAGGAAGATG             | 60.1                              | 259                            | Genic            | Ca1         | 203295                  | Zinc finger C-x8-C-x5-C-x3-H type                                                  |
| CaSSR2      | (TTA)8                       | TGATGATTATTTGCTTTCCTC            | GCAACTAGAAAGACGCTGATAA           | 54.4                              | 152                            | Genic            | Ca1         | 203312                  | Zinc finger C-x8-C-x5-C-x3-H type family protein                                   |
| CaSSR3      | (TCT)7                       | ACGGTCAGTGAGCTGCTTCT             | TCCCAATCCTAGCTACCACG             | 60.1                              | 151                            | Genic            | Ca1         | 317669                  | Pseudouridine synthase family protein                                              |
| CaSSR4      | (TCTCAT)4                    | GGTGTACTGATTTCAATGTT             | AGGAGCATCTTCTTCACTTTC            | 54.4                              | 156                            | Genic            | Ca1         | 389097                  | TCP family transcription factor                                                    |
| CaSSR5      | (ATTCTC)5                    | CAACAACAACAACAAGAATCA            | GTTTGAAGAAGGTTGTTGGAT            | 54.7                              | 153                            | Genic            | Ca1         | 390435                  | TCP family transcription factor                                                    |
| CaSSR6      | (GA)11                       | TCAAAGAACCAAAATTCGAACA           | CGGTTGATTGATAATTCTCGTG           | 59.6                              | 153                            | Genomic          | Ca1         | 472339                  |                                                                                    |
| CaSSR7      | (CAT)5                       | AACCTCTTCTTTACACCTTGC            | GGGGATATGATCCAGCCTTT             | 60.1                              | 279                            | Genic            | Ca1         | 505905                  | KT2, a photosynthate- and light-dependent inward rectifying potassium channel      |
| CaSSR8      | (ATAAA)9                     | TGCTGCCAACAACTTAGCA              | GGCACCTTTCCTTGTACTGG             | 60.6                              | 202                            | Genomic          | Ca1         | 1145423                 |                                                                                    |
| CaSSR9      | (AT)8                        | GGCTGTGTTGGTTGTGTTG              | TTGCATGCTTTTACCAACC              | 58.7                              | 180                            | Genic            | Ca1         | 2046119                 | Putative secretory carrier membrane protein (SC3).                                 |
| CaSSR10     | (AAC)6                       | TGGGTTTGAGTTCTAAACAAG            | CATTTACAGCTTCTGATTGT             | 54.6                              | 151                            | Genic            | Ca1         | 2346126                 | Dof zinc finger protein adof2.                                                     |
| CaSSR11     | (GAG)6                       | GGAAGCAGAAACAGTAGAGGT            | TGTTCTTCTCCTCTTTAACCC            | 55.3                              | 165                            | Genic            | Ca1         | 2631745                 | zinc finger domain containing protein                                              |
| CaSSR12     | (TCT)6                       | GAAGCATCGTCTTCCCTGAG             | AATCGTGGCGTTGTTTCTC              | 60.1                              | 192                            | Genic            | Ca1         | 2994601                 | RNA helicase family protein                                                        |
| CaSSR13     | (GGAAGT)3                    | ATAATGGTTACTTTCGGAGGA            | TCTTCTCGTGTTCATGTTCT             | 55.4                              | 151                            | Genic            | Ca1         | 3235738                 | sequence-specific DNA binding transcription factors                                |
| CaSSR14     | (AT)9                        | TTGAACCCCAAAATCTCAGC             | AAAGATGGTCCATAGTGAAGCAC          | 60.1                              | 237                            | Genomic          | Ca1         | 3688143                 |                                                                                    |
| CaSSR15     | (GA)18                       | GTTAGGGGCCCAATTTGAAC             | GATGGCTTACGACCTTGTT              | 60.5                              | 210                            | Genomic          | Ca1         | 4097905                 |                                                                                    |
| CaSSR16     | (CTGATT)4                    | CGCAGATTATATCTCACGGTA            | CTATACCGTTTCAAATCCAAA            | 55.6                              | 148                            | Genic            | Ca1         | 4865629                 | BSD domain-containing protein                                                      |
| CaSSR17     | (TTG)4                       | AAAACAAGGAACCAAGAAG              | ATCTCCTCTATCATTGGTGGT            | 55.3                              | 126                            | Genic            | Ca1         | 5666044                 | nuclear coiled-coil protein related to the carrot peripheral nuclear protein NMCP1 |
| CaSSR18     | (TCT)6                       | TACCCAGATGAGATCTACGAA            | GGATGGTATCACTGTTTGTGT            | 54.9                              | 152                            | Genic            | Ca1         | 6750597                 | myb-like HTH transcriptional regulator family protein                              |
| CaSSR19     | (AT)14                       | CACATTTGTCATTTTGiAACAGCA         | TGAGTTGGGAGGGGAGACTA             | 60.0                              | 259                            | Genomic          | Ca1         | 8867063                 |                                                                                    |
| CaSSR20     | (ATG)5                       | AATTCAGGTCCTACAAAATCC            | GAGCAGTGTGCCTATGATATT            | 54.8                              | 151                            | Genic            | Ca1         | 9791574                 | Glabra 2, a homeodomain protein                                                    |
| CaSSR21     | (TCATGA)4                    | ATCATCATGAAGCATCCATAG            | TATCGGATATAGCTTTTGCAC            | 55.1                              | 156                            | Genic            | Ca1         | 10682877                | Involved in radial organization of the root and shoot axial organs                 |
| CaSSR22     | (TCATGA)4                    | ATCATCATGAAGCATCCATAG            | TATCGGATATAGCTTTTGCAC            | 55.1                              | 156                            | Genic            | Ca1         | 10682877                | Involved in radial organization of the root and shoot axial organs                 |
| CaSSR23     | (AATAA)4                     | CCTTTTGGGTTCTTATGATT             | ATTACACGAAGGATGAATTTG            | 55.0                              | 151                            | Genic            | Ca1         | 10893797                | putative transcription factor                                                      |
| CaSSR24     | (CAA)6                       | CCTTCACCTATCCCACTGGA             | TGGGCCAAAGTGATAAGAC              | 59.9                              | 249                            | Genic            | Ca1         | 11011602                | Protein kinase superfamily protein                                                 |
| CaSSR25     | (AT)11                       | AATCATAACCGATAACAAAACATCAT       | TCATTAGACTCCAACAATTCATAGAC       | 57.3                              | 268                            | Genomic          | Ca1         | 11261320                |                                                                                    |
| CaSSR26     | (TAT)8                       | AGAAGAATCCAATCCA AAC             | GAAGCCTCTTCTCCTGATAC             | 55.0                              | 148                            | Genic            | Ca1         | 11285919                | GRAS family Protein, transcription factor                                          |
| CaSSR27     | (CAA)6                       | CCACCTGTACTATTCTTCA              | AAGGAGAATCAGAACCTTCCAC           | 55                                | 151                            | Genic            | Ca1         | 11897074                | DUF1635                                                                            |
| CaSSR28     | (GAT)6                       | ATGAGTCAAAGCCATAGTCAC            | TTCTTCTTCAGTTGGATGAAA            | 55                                | 153                            | Genic            | Ca1         | 11899747                | NAC                                                                                |
| CaSSR29     | (CTC)4                       | CTAAAGAATGGAATTGGGATT            | CTCGTTTGTGCTCTATTGT              | 55                                | 150                            | Genic            | Ca1         | 11902768                | SBP                                                                                |
| CaSSR30     | (AT)12                       | GTTGGTGCCAACATGCCTAT             | TGAACCGTGTTCaAAACCT              | 60.8                              | 163                            | Genomic          | Ca1         | 11960068                |                                                                                    |
| CaSSR31     | (CTT)9                       | TAAGTTGTGGCTGTGAGAGAT            | GCATGAAAATTCAGAGAGAAA            | 55.0                              | 157                            | Genic            | Ca1         | 12928971                | GLK1, Golden2-like 1                                                               |
| CaSSR32     | (GAA)9                       | TGAGGATTCAAATGTTAAGGGG           | TTCAGCAAGCAATGCAAAATC            | 60.0                              | 255                            | Genic            | Ca1         | 14140590                | Homeodomain-related                                                                |
| CaSSR33     | (AAC)5                       | TCCTTTTGGTGACACTACAAATACA        | AAAAAGAGACGCCAATTCACG            | 60.2                              | 277                            | Genic            | Ca1         | 15231892                | Eukaryotic aspartyl protease family protein                                        |
| CaSSR34     | (AAT)7                       | ACCTTATCAATGATTGCTTCA            | CAAGACAAAGAGGAAATTTGTG           | 54.9                              | 154                            | Genic            | Ca1         | 15378933                | putative transcription factor                                                      |
| CaSSR35     | (AG)10                       | GTTCCGAATTTGCGATCACT             | TTTGCCGTTTATGGTGATAA             | 60.1                              | 200                            | Genomic          | Ca1         | 16531210                |                                                                                    |
| CaSSR36     | (AG)13                       | GAACTGAGCGAGGAAGTTGG             | ACATCTCCGAACTCGACCAC             | 60.1                              | 165                            | Genic            | Ca1         | 16618090                | putative TRAPP1I tethering factor                                                  |

| Marker IDs* | Microsatellite repeat-motifs | Forward Primer sequences (5'-3') | Reverse Primer sequences (5'-3') | Actual annealing temperature (0C) | Size (bp) of alleles amplified | Types of markers | Chromosomes | Physical positions (bp) | Putative functions                                                         |
|-------------|------------------------------|----------------------------------|----------------------------------|-----------------------------------|--------------------------------|------------------|-------------|-------------------------|----------------------------------------------------------------------------|
| CaSSR37     | (TAA)7                       | TGAGATAATGGAGCTTGAATC            | AGCTTGTGAAGTGACACAGT             | 54.5                              | 152                            | Genic            | Ca1         | 20106435                | basic helix-loop-helix (bHLH) DNA-binding superfamily protein              |
| CaSSR38     | (AAG)5                       | TTTCTCACTTCAAAGACCCA             | ATTTGACGAAACTCCAACGG             | 60.0                              | 252                            | Genic            | Ca1         | 21017902                | IQ-domain 22 (IQD22)                                                       |
| CaSSR39     | (ATC)5                       | AAGACCAATCATCAAACCGAA            | AAGCTTGTGCAGGGAACACT             | 59.9                              | 172                            | Genic            | Ca1         | 21506732                | YABBY family of transcriptional regulators                                 |
| CaSSR40     | (CT)12                       | GCGATCTCTCGAAAACCTA              | GAACGCAAACACATGATTG              | 60.0                              | 159                            | Genic            | Ca1         | 21752019                | ENSANGP0000022085 related                                                  |
| CaSSR41     | (TA)12                       | TGAGAGAGGAAAAaCaGATTGAGA         | CACGGATCTTGTGAGTGACC             | 59.5                              | 141                            | Genomic          | Ca1         | 30671033                |                                                                            |
| CaSSR42     | (TCT)10                      | GCCATCTTCTACTCCGCAC              | AATTGGAACCTACCCTCGG              | 60.1                              | 231                            | Genic            | Ca1         | 31527936                | putative protease SppA (SppA).                                             |
| CaSSR43     | (TC)7                        | TGAGAACAAGACCAGAGTCAC            | GCATTTGTTCTTGAATCTCTC            | 55.3                              | 144                            | Genic            | Ca1         | 37689960                | Possible function in phloem development in the root                        |
| CaSSR44     | (CT)8                        | CCTCTTCAAACATCCTCACA             | TCTCGAGCGATCCATCTTTT             | 59.9                              | 201                            | Genic            | Ca1         | 43729171                | Trypsin family protein                                                     |
| CaSSR45     | (GGA)7                       | AGAGAAGAGAGAGGGTCCGG             | CGACTTCGAGTCCCGTCTTC             | 60.0                              | 184                            | Genic            | Ca1         | 43894448                | TT_ORF1, TT viral orf 1                                                    |
| CaSSR46     | (AC)6cct(C)15                | AAACGGATCAATGCGAGAAG             | CATTACATTGTCATTTGGCCC            | 60.2                              | 279                            | Genomic          | Ca1         | 46935324                |                                                                            |
| CaSSR47     | (AT)8                        | CTACCTTATGGGCACGCAAT             | AGCCAATTTGGTGTgGAAG              | 60.0                              | 265                            | Genomic          | Ca1         | 47131694                |                                                                            |
| CaSSR48     | (ATTTT)4                     | AGGAATTAAGGTGATGAAAGC            | GTTTAAACAAGACGGACCAAT            | 55.2                              | 164                            | Genic            | Ca1         | 47290885                | BES1/BZR1 homolog 4 (BEH4)                                                 |
| CaSSR49     | (TAA)7                       | CATGGAATTCGGTGCTACT              | GACGGGTAGCTGCATGAAA              | 59.9                              | 112                            | Genic            | Ca1         | 48129325                | TCP family transcription factor                                            |
| CaSSR50     | (GA)13                       | ATGGAGGCGAATATATAGGAG            | TTTTAAGAAACAACCTGCGTTC           | 55.1                              | 151                            | Genic            | Ca2         | 354109                  | LOB domain-containing protein 41 (LBD41)                                   |
| CaSSR51     | (GAT)6                       | GGAATTTTGGTGATGATTTTC            | CAACATATGAAGGAACACACA            | 56.0                              | 149                            | Genic            | Ca2         | 1133300                 | WRKY Transcription Factor                                                  |
| CaSSR52     | (TTC)11                      | GTCCCCGCAGTTACTGTTA              | GTAATTTGGAAGCCGTCGT              | 60.0                              | 218                            | Genic            | Ca2         | 1588490                 | Protein of unknown function (DUF3531)                                      |
| CaSSR53     | (AC)6(A)10                   | TTGTTTCTCAAACCAACTACA            | TGCTTCCATAAGTTCTCCCG             | 57.3                              | 119                            | Genomic          | Ca2         | 1754600                 |                                                                            |
| CaSSR54     | (AG)11                       | TGAGAAAAATTAGCACACAAAG           | ACATATTCATGCTGTTGTTCC            | 55.0                              | 143                            | Genic            | Ca2         | 2409848                 | homeodomain leucine zipper class I (HD-Zip I) transcriptional activator    |
| CaSSR55     | (ATG)5                       | TTGAAGGTGGTGATGGTGAA             | GGGCACCTTATTAGCCCAT              | 60.2                              | 169                            | Genic            | Ca2         | 3226335                 | Glutaredoxin family protein                                                |
| CaSSR56     | (TTAA)3                      | CATCTATAAATGTGGCACAAG            | GATGGAGTGAAGTTTGAGATG            | 53.4                              | 128                            | Genic            | Ca2         | 3236381                 | PRE1 (PACLOBUTRAZOL RESISTANCE1)                                           |
| CaSSR57     | (CACAAA)4                    | GGAGGTTATAACAACACCAAC            | GGCTTTGTTATGTTGAGGTT             | 53.7                              | 150                            | Genic            | Ca2         | 3451762                 | Mitochondrial substrate carrier family protein                             |
| CaSSR58     | (TGT)5                       | CAGGAACCAAGATTGCAAGA             | GGGAAAGAGTTCAAACCCA              | 59.0                              | 192                            | Genic            | Ca2         | 3632977                 | SPX domain gene 4 (SPX4)                                                   |
| CaSSR59     | (TCA)7                       | CAACCAAAAAGACAAGAATGA            | GGCTCTTGATACCCTTACAAT            | 55.5                              | 160                            | Genic            | Ca2         | 4036035                 | a chloroplast trans-acting factor of the psbD light-responsive promoter    |
| CaSSR60     | (TCA)7                       | CAACCAAAAAGACAAGAATGA            | GGCTCTTGATACCCTTACAAT            | 55.5                              | 160                            | Genic            | Ca2         | 4036035                 | a chloroplast trans-acting factor of the psbD light-responsive promoter    |
| CaSSR61     | (TGA)7                       | GGCTCTTGATACCCTTACAAT            | CAACCAAAAAGACAAGAATGA            | 55.0                              | 160                            | Genic            | Ca2         | 4036194                 | a chloroplast trans-acting factor of the psbD light-responsive promoter    |
| CaSSR62     | (TAA)15                      | TAAATCCTCCTCCACACCG              | GGATGGACACATACATgGGG             | 59.9                              | 169                            | Genomic          | Ca2         | 4037173                 |                                                                            |
| CaSSR63     | (GA)14                       | GCAAAAGACACATTTAGGGTTT           | GTAGGTGCAGGCCCTACCTT             | 57.4                              | 270                            | Genomic          | Ca2         | 4570670                 |                                                                            |
| CaSSR64     | (CCA)11                      | ACATTGTTGGTCGTGTTTGC             | GGGTGATGTTGGAAGGATGA             | 60.7                              | 259                            | Genic            | Ca2         | 6404844                 | Core-2/l-branching beta-1,6-N-acetylglucosaminyltransferase family protein |
| CaSSR65     | (TA)11                       | GAACCCCTTcAACAAACGA              | CGAGCCTCGTAAAATCCAAA             | 59.9                              | 158                            | Genomic          | Ca2         | 6749922                 |                                                                            |
| CaSSR66     | (AT)11                       | CCCTTCACTTTCTCACATAAAGG          | AAGCCCTGTAACCTCCAGTCG            | 59.2                              | 195                            | Genomic          | Ca2         | 8249226                 |                                                                            |
| CaSSR67     | (CTT)8                       | TCCTCCAACAACAACACCAA             | AGGAGGAACCTTTGAAACCC             | 59.4                              | 218                            | Genic            | Ca2         | 9985718                 | Nucleic acid-binding proteins superfamily                                  |
| CaSSR68     | (TTC)6                       | AATGCCTTCACGAATTTGG              | AGTTACTTCTCGGGGTTT               | 60.0                              | 240                            | Genic            | Ca2         | 10263909                | Expressed protein                                                          |
| CaSSR69     | (AG)12                       | TTCCAGATCTCCGGTAGGTG             | ACTCTCCACTCTCCAACCA              | 59.7                              | 209                            | Genic            | Ca2         | 10330416                | A basic helix-loop-helix encoding gene (BIGPETAL, BPE)                     |
| CaSSR70     | (ATC)4                       | AGCAAATTTATGCTACAAAC             | TCCTAGTTCAATTCCTGATGA            | 54.8                              | 151                            | Genic            | Ca2         | 11661488                | homeodomain leucine zipper class I (HD-Zip I) protein.                     |
| CaSSR71     | (TC)10                       | TGGATCCATTTGGTTGGAT              | TTCTTCTCGTGCAGTCCGT              | 60.0                              | 226                            | Genomic          | Ca2         | 12299937                |                                                                            |

| Marker IDs* | Microsatellite repeat-motifs | Forward Primer sequences (5'-3') | Reverse Primer sequences (5'-3') | Actual annealing temperature (°C) | Size (bp) of alleles amplified | Types of markers | Chromosomes | Physical positions (bp) | Putative functions                                                                  |
|-------------|------------------------------|----------------------------------|----------------------------------|-----------------------------------|--------------------------------|------------------|-------------|-------------------------|-------------------------------------------------------------------------------------|
| CaSSR72     | (GCA)4                       | CTTTAATCATGCCAGCTCTAC            | TCCCTTTCTCTTTCTCTTTTC            | 54.4                              | 165                            | Genic            | Ca2         | 14624000                | AL4, Alfin-Like family protein containing PhD domain                                |
| CaSSR73     | (TA)10                       | TGGATGAGCCcTTCTTGAAC             | TGAAATTTAAATGGGTGCCA             | 60.2                              | 182                            | Genomic          | Ca2         | 14846317                |                                                                                     |
| CaSSR74     | (ATG)9                       | CAGGCCTTGTTTGTGAGGT              | TTCTCCTCGATTTCAATGGG             | 60.0                              | 206                            | Genic            | Ca2         | 15235771                | ABI five binding protein (AFP1)                                                     |
| CaSSR75     | (TG)7(TA)8                   | TCGGAAAAATTGAGAAAGTCTTCA         | GCAAAATGCTCCCTCAATTGA            | 60.2                              | 276                            | Genomic          | Ca2         | 15920661                |                                                                                     |
| CaSSR76     | (AT)10                       | TGACCATTTCATTAGTTCTCAA           | GCCACACCACITTCATTTTTC            | 59.6                              | 246                            | Genomic          | Ca2         | 17520553                |                                                                                     |
| CaSSR77     | (CT)8ttc(T)10                | TCCGTTTAATTTTGCTTGCT             | CGTGACITTCAAAACCATGA             | 57.6                              | 248                            | Genomic          | Ca2         | 18353310                |                                                                                     |
| CaSSR78     | (ACA)8                       | CTCAAACCTCCTCCAGGAAGC            | TAAACCCCATCTTGCGCCA              | 60.0                              | 270                            | Genomic          | Ca2         | 19292063                |                                                                                     |
| CaSSR79     | (TGA)4                       | TGTCATCTGAAAAAGATTGA             | TTGGTTTCTCATCAACAACT             | 55.1                              | 150                            | Genic            | Ca2         | 23951109                | auxin (indole-3-acetic acid) induced gene                                           |
| CaSSR80     | (TTA)7                       | AAGATTTACCGCATCACATATCTC         | CCTCCTACCCACATTACCA              | 58.6                              | 203                            | Genomic          | Ca2         | 25670979                |                                                                                     |
| CaSSR81     | (CAA)4                       | AAAACAACAACCTTCAATGC             | TCTCCAATTGTAACCATCATC            | 54.6                              | 155                            | Genic            | Ca2         | 26834137                | plant WRKY transcription factor                                                     |
| CaSSR82     | (TC)12                       | CATCTCTCTCACTCTCTTTCC            | AGATATGGGTAGCAACGAAC             | 53.2                              | 200                            | Genic            | Ca2         | 27694606                | ERF (ethylene response factor) subfamily B-5 of ERF/AP2 transcription factor family |
| CaSSR83     | (TGG)6                       | TCTAGGCCTGAAAAATGGTT             | TGATTTCCATTTCCTCTTGC             | 60.0                              | 179                            | Genic            | Ca2         | 27874806                | Expressed protein                                                                   |
| CaSSR84     | (TTC)5                       | TCTTTTCGCTTCACTCCCTC             | GGTGGAAGCGGTTATTGAGA             | 60.1                              | 227                            | Genic            | Ca2         | 28230844                | Concanavalin A-like lectin Putative protein kinase                                  |
| CaSSR85     | (AT)16                       | TTGTCACCATTATCTCCACTC            | CCAATATCTATTTCATCTTCCCT          | 55.1                              | 144                            | Genic            | Ca2         | 29098865                | protein disulfide isomerase-like (PDIL) protein                                     |
| CaSSR86     | (TC)9                        | AGCGATGAGAGCGAGTAAGC             | TCTCTCCCAATTCACCATC              | 59.9                              | 278                            | Genic            | Ca2         | 29913078                | protein affected traf#64257                                                         |
| CaSSR87     | (CAG)7                       | TTGGTTAAGGATGTTCTTCT             | CTACCATCTGCTCTTGCTCTA            | 55.5                              | 154                            | Genic            | Ca2         | 30868340                | CZF1                                                                                |
| CaSSR88     | (TA)11                       | AAAACGCAACACCACTCC               | GTGaATAATTAGCTCTCTGATACCAT       | 60.0                              | 237                            | Genomic          | Ca2         | 31798047                |                                                                                     |
| CaSSR89     | (CAT)5                       | TGGAATGAaGAGATCtTCGC             | CAAGTGGCAGCAGAAGTTCA             | 60.3                              | 165                            | Genomic          | Ca2         | 32013920                |                                                                                     |
| CaSSR90     | (GAA)11                      | CAAGTGAATGAATTCTCAAGC            | CTCTCTTTCCTCTCATCTTCC            | 55.1                              | 152                            | Genic            | Ca2         | 32867739                | EIN3 (ethylene-insensitive3)                                                        |
| CaSSR91     | (GGT)4                       | CATGAACAACATCATCAACAA            | CTCCACCCTACTTGTACTCTG            | 55.3                              | 148                            | Genic            | Ca2         | 33605178                | SHI gene family protein                                                             |
| CaSSR92     | (TG)11                       | GGGGGTAAGATTCTCCACA              | TCCATAATTGAGGATCTTG              | 60.2                              | 225                            | Genomic          | Ca2         | 33722683                |                                                                                     |
| CaSSR93     | (CTT)5                       | ACCATTGGCATTGTTCCCTC             | GCGAAACCTGGAGTTCTTGT             | 59.3                              | 266                            | Genic            | Ca2         | 33745627                | CLAVATA1-related receptor kinase-like protein                                       |
| CaSSR94     | (GAT)10                      | GCAACAAAAGAAAAGGCAGC             | TTCTTCTCCTCCTCTCTCC              | 60.0                              | 195                            | Genomic          | Ca2         | 34684799                |                                                                                     |
| CaSSR95     | (GAA)5                       | TTGAGCTGGAAGAGGTGCT              | CACTCCTCACATCCAACCCCT            | 60.0                              | 118                            | Genic            | Ca2         | 35079352                | trigger factor type chaperone family protein                                        |
| CaSSR96     | (CCA)6                       | ATTGATGACTCCGATTTTCGC            | ACCAGTTGTCTACCCCAAA              | 59.3                              | 148                            | Genic            | Ca2         | 35422305                | RNA-binding (RRM/RBD/RNP motifs) family protein                                     |
| CaSSR97     | (CT)6ca(CT)6                 | AAAATGCACTTGTGTTTTTGG            | GCAACTTGATGCGAATTGAC             | 57.7                              | 279                            | Genomic          | Ca2         | 35431751                |                                                                                     |
| CaSSR98     | (TC)12                       | GATGGTCTGTGAAATGTGC              | TCCGCATTGAGATAAGGTCC             | 60.1                              | 214                            | Genomic          | Ca2         | 35754585                |                                                                                     |
| CaSSR99     | (TTCATT)4                    | AATGAGCTACTGCTGTCTTCA            | CCAGCAAAGTAAGAACTCAA             | 55.4                              | 157                            | Genic            | Ca3         | 80260                   | NAC domain transcription factor                                                     |
| CaSSR100    | (TTTGAG)4                    | ATTCCACTTGTGCTGATAAA             | CTAAAAATGGAGGAGGAAGAG            | 55.0                              | 151                            | Genic            | Ca3         | 80320                   | NAC domain transcription factor                                                     |
| CaSSR101    | (TTC)4                       | ACGCTTCAAGTATTGAACAAC            | AAGGAAACACACTTCACTCT             | 54.7                              | 150                            | Genic            | Ca3         | 81357                   | NAC domain transcription factor                                                     |
| CaSSR102    | (AT)10                       | TGAAGCTAGGCTTGGTGGAT             | ATTTTTACCCGACCGTTTTG             | 59.8                              | 148                            | Genomic          | Ca3         | 925403                  |                                                                                     |
| CaSSR103    | (AAT)6                       | GGAGTTGGATTCTCGTGC               | AATGGAACAAGTGGCTTTGC             | 59.7                              | 240                            | Genomic          | Ca3         | 2898679                 |                                                                                     |
| CaSSR104    | (TC)14                       | CGGCCATTGAAAACGAATAC             | TGGGTATTGGACTCCTTTCT             | 60.3                              | 266                            | Genomic          | Ca3         | 3090422                 |                                                                                     |
| CaSSR105    | (TAT)21                      | TGCTCTATTTCGTTCCCTTTC            | TCCGTTAAAGTTTCACTGCATTT          | 59.9                              | 278                            | Genomic          | Ca3         | 3745505                 |                                                                                     |
| CaSSR106    | (TTA)31                      | TGTCATGCTTATTCCGACATCT           | TCTcCCACCTCTGTGCTTT              | 59.6                              | 244                            | Genomic          | Ca3         | 4772252                 |                                                                                     |
| CaSSR107    | (TGA)5                       | TTGGAAGAAACACTGAATGAT            | CTTTTTCTTCGTACGGTGATA            | 54.8                              | 150                            | Genic            | Ca3         | 7435046                 | SMAD/FHA domain-containing protein                                                  |
| CaSSR108    | (AACAG)5                     | AGAGAAGAAGTCCAACAATCC            | AGGTACAAGAAAGTGCAACA             | 55.0                              | 159                            | Genic            | Ca3         | 10489944                | ACT-domain containing protein                                                       |
| CaSSR109    | (TTG)5                       | GGGTCATTTTGTGCTCAT               | AATTTTGTGCATGACCCCTGA            | 59.0                              | 143                            | Genic            | Ca3         | 12394016                | Expressed protein                                                                   |
| CaSSR110    | (GA)9                        | TGAGGGAGAGACACATGAAa             | CGGAAATTTTGTGTTCCAAG             | 59.8                              | 212                            | Genomic          | Ca3         | 15320676                |                                                                                     |
| CaSSR111    | (TTA)7                       | GAGGTTGGGGTTGGTTTCTT             | CCATTCGCCTTCAATTTTGT             | 60.2                              | 208                            | Genomic          | Ca3         | 16451987                |                                                                                     |
| CaSSR112    | (ATTCA)6                     | CCTTTCACTCACTTCAAC               | AGGATAAAGGTGAAGCAAATC            | 54.8                              | 165                            | Genic            | Ca3         | 16813885                | basic helix-loop-helix (bHLH) DNA-binding superfamily protein                       |
| CaSSR113    | (TTTA)8                      | TGTGACATGATTTATGAATGACTTTTT      | TTAGGTTGTTCCAGTTGGC              | 60.1                              | 207                            | Genomic          | Ca3         | 17876577                |                                                                                     |



| Marker IDs* | Microsatellite repeat-motifs | Forward Primer sequences (5'-3') | Reverse Primer sequences (5'-3') | Actual annealing temperature (°C) | Size (bp) of alleles amplified | Types of markers | Chromosomes | Physical positions (bp) | Putative functions                                                                   |
|-------------|------------------------------|----------------------------------|----------------------------------|-----------------------------------|--------------------------------|------------------|-------------|-------------------------|--------------------------------------------------------------------------------------|
| CaSSR114    | (CATCAC)3                    | ACCATCATAACCATCATCATC            | GGAAACCCTAGGTATTGTTGT            | 54.6                              | 143                            | Genic            | Ca3         | 20843695                | one of two Arabidopsis RAPTOR/KOG1 homologs                                          |
| CaSSR115    | (CAT)6                       | CGTTTCCATTAGAGGAGAGAC            | ATGAAAGTGATGGTGATAACG            | 55.6                              | 162                            | Genic            | Ca3         | 20843747                | one of two Arabidopsis RAPTOR/KOG1 homologs                                          |
| CaSSR116    | (TCC)5                       | TCATCTGGGAAAAGGGAGTG             | AAGGACCTCATCAAACCAGAA            | 60.0                              | 195                            | Genic            | Ca3         | 21366194                | WRKY Transcription Factor                                                            |
| CaSSR117    | (AAC)8                       | ACACACTTCAAGAAACTTCCA            | CTAAATCAGCAGCAGTAGGTG            | 54.9                              | 150                            | Genic            | Ca3         | 21774818                | novel family similar to DNA binding proteins containing basic-leucine zipper regions |
| CaSSR118    | (CTA)8                       | TCCCGTGAAACTGTCACAAA             | CACCTGGAGAAGCTGAAATTG            | 59.9                              | 277                            | Genic            | Ca3         | 25631919                | Expressed protein                                                                    |
| CaSSR119    | (CAA)7                       | TCTTACACCAAAACACAAACA            | GAAGTGTTGTTGTTCCATA              | 54.3                              | 154                            | Genic            | Ca3         | 25672196                | MYC-like bHLH transcriptional activator                                              |
| CaSSR120    | (AATGAA)4                    | AATAGTTCCAAAGGGTGAGAA            | CCTTCTGTTGGAATTGAACT             | 55.5                              | 142                            | Genic            | Ca3         | 26594189                | GATA transcription factor gene GNC                                                   |
| CaSSR121    | (ACA)7                       | TTTCAGTGTGTTGGAAGACT             | TGACTCATTTTGGTTTTGTCT            | 54.9                              | 146                            | Genic            | Ca3         | 26594514                | GATA transcription factor gene GNC                                                   |
| CaSSR122    | (TGT)4                       | TGAGTATCCCTTAATCACGAA            | TGCACAGTAACAACAACACTCAG          | 54.9                              | 146                            | Genic            | Ca3         | 27041765                | BTB-POZ and MATH domain 4 (BPM4)                                                     |
| CaSSR123    | (AT)7                        | CCAACCAATGAAAGCTAGGC             | TCCTATACCAATCCCCACA              | 60.0                              | 134                            | Genic            | Ca3         | 27694641                | PHLOEM INTERCALATED WITH XYLEM (PXY)                                                 |
| CaSSR124    | (CATCAC)3                    | AGATTACTCATTACCGCATCA            | TCAAGCTATTGATCTTCTTGC            | 54.9                              | 149                            | Genic            | Ca3         | 28874001                | HLH, Helix-loop-helix DNA-binding domain                                             |
| CaSSR125#   | (TAA)5                       | CGCATCTTCAATCCATCCT              | GGGCCCAACTCAAAGTTTC              | 60.8                              | 159                            | Genic            | Ca3         | 29594640                | ABC2_membrane, ABC-2 type transporter                                                |
| CaSSR126    | (CT)11                       | TGTCGCCATCTTCTCATTCA             | TTATTTCAATGGGGTTCCAGC            | 59.8                              | 241                            | Genic            | Ca3         | 29681010                | NIMA-related serine/threonine Putative protein kinases (Neks)                        |
| CaSSR127    | (AT)16                       | TTCACAACAACACCACACAa             | TCACACGTGTCACAGTTCCA             | 58.5                              | 174                            | Genomic          | Ca3         | 30299506                |                                                                                      |
| CaSSR128    | (AG)6                        | TGAACCCAACAAGGAACCAT             | CCCCATGTGCTAAAAGCAAC             | 60.5                              | 223                            | Genic            | Ca3         | 30690824                | Plant protein of unknown function (DUF868)                                           |
| CaSSR129    | (TAT)6                       | AGTGGTGGAAGTATCCGTGG             | AAGGATGAAAAACAGAGGGTG            | 58.2                              | 237                            | Genic            | Ca3         | 30756503                | seed storage 2S albumin superfamily protein                                          |
| CaSSR130    | (GA)10                       | CCTCTGAAATGGGACTGTT              | AACACTTCCCCACACAAC               | 55.0                              | 141                            | Genic            | Ca3         | 31064037                | ERF (ethylene response factor)                                                       |
| CaSSR131    | (AAC)4                       | TTATCATCCAATGATGAATCC            | ACTCCTCTAAACACCCTTTTG            | 54.8                              | 155                            | Genic            | Ca3         | 31248988                | ERF (ethylene response factor)                                                       |
| CaSSR132    | (TA)9                        | TCGTTTGCACCTGTTTTAGCC            | TGTGAGCACTCATCGGTCAT             | 60.3                              | 201                            | Genomic          | Ca3         | 32341145                |                                                                                      |
| CaSSR133    | (TA)10                       | TCCTCCATTGCCTTTTCATC             | GCATATTTGGGACTAAGCATGT           | 60.0                              | 229                            | Genomic          | Ca3         | 32408558                |                                                                                      |
| CaSSR135    | (CTT)7                       | GCATCACAAGCTTCAACAGC             | TTTTGGGTTGATGGGTGATT             | 60.0                              | 213                            | Genic            | Ca3         | 32584632                | Chloroplast-targeted copper chaperone protein                                        |
| CaSSR134    | (CTT)9                       | GCATCACAAGCTTCAACAGC             | TTTTGGGTTGATGGGTGATT             | 59.6                              | 213                            | Genomic          | Ca3         | 32584632                |                                                                                      |
| CaSSR136    | (AT)6(AG)7                   | AGGTATAAGAATGTCcaCCTTT           | AGAAATGCAAGCATCGTCAA             | 57.5                              | 237                            | Genomic          | Ca3         | 34902234                |                                                                                      |
| CaSSR137    | (CTT)5                       | ACATTCCTCCATTCCATTGAA            | ATTTGGAATCCATGGTGCTC             | 59.8                              | 215                            | Genic            | Ca3         | 35872876                | FASCICLIN-like arabinogalactan protein 16 precursor (FLA16)                          |
| CaSSR138    | (AG)19                       | ACCATTAAACAGTCAACCATTG           | CAGATATGTTCTGCAATTGAT            | 55.0                              | 153                            | Genic            | Ca3         | 36810456                | group-S bZIP transcription factor                                                    |
| CaSSR139    | (AAG)7                       | GATATCTGGATCGGGTCTATT            | CATACCACACCATTTCAATCT            | 54.7                              | 144                            | Genic            | Ca3         | 36944041                | Zinc knuckle (CCHC-type) family protein                                              |
| CaSSR140    | (TCT)5                       | TCCTAAATCTAATTCTATTTGCATAA       | ATCGCAAATGAAACGGAGTC             | 60.1                              | 248                            | Genic            | Ca3         | 37063772                | RING/U-box superfamily protein                                                       |
| CaSSR141    | (AATTGT)4                    | GGAACAACCTCAAGCTCAGTAA           | ATCCTTAGATCAGAGGAACCA            | 54.8                              | 164                            | Genic            | Ca3         | 37101948                | squamosa promoter-binding protein-like 12 (SPL12)                                    |
| CaSSR142    | (AGA)6                       | CAGATTCCAACAGTGCAGTG             | ATTGCAATGTGAACCCACAA             | 59.8                              | 253                            | Genic            | Ca3         | 37377922                | Pectinacetyltransferase family protein                                               |
| CaSSR143    | (GAC)4                       | TACATGTTTCAGCACAGCTAGA           | TCTTCTTCTCGTCTCTTCT              | 54.7                              | 150                            | Genic            | Ca3         | 37789311                | ACT-domain containing protein                                                        |
| CaSSR144    | (TA)9                        | AGGGAAACTTGACCCTCCAT             | TGTTTGAAATTGCCACAAGC             | 59.8                              | 191                            | Genomic          | Ca3         | 38027665                |                                                                                      |
| CaSSR145    | (GAT)6                       | GAGCATCATAAGCGACGTGA             | CCGCCAATCATATCCATTCT             | 59.7                              | 140                            | Genic            | Ca3         | 38354781                | protein similar to glutathione synthetases                                           |
| CaSSR146    | (TAA)12                      | AATACGCATCCAATCCATCC             | GTGTGGTGCTGCACAGAGTT             | 59.9                              | 267                            | Genic            | Ca3         | 38610591                | Rubredoxin-like superfamily protein                                                  |
| CaSSR147    | (GAA)7                       | CAAAGTAAACCCACCCTGCTA            | ACCGCAATATGGAACACGAT             | 60.2                              | 259                            | Genic            | Ca3         | 38624905                | Expressed protein                                                                    |

| Marker IDs* | Microsatellite repeat-motifs | Forward Primer sequences (5'-3') | Reverse Primer sequences (5'-3') | Actual annealing temperature (°C) | Size (bp) of alleles amplified | Types of markers | Chromosomes | Physical positions (bp) | Putative functions                                                                                       |
|-------------|------------------------------|----------------------------------|----------------------------------|-----------------------------------|--------------------------------|------------------|-------------|-------------------------|----------------------------------------------------------------------------------------------------------|
| CaSSR148    | (TCA)8                       | AACACTTGAACATTTCAAACC            | ATGGTGATGTTGTACCAAAG             | 55.0                              | 153                            | Genic            | Ca3         | 38689024                | Duplicated homeodomain-like superfamily protein                                                          |
| CaSSR149    | (ATT)5                       | TCTCTCCACAAAGGTCCC               | GAAGGTGGCCAAGAGATGAA             | 60.2                              | 134                            | Genic            | Ca3         | 38689689                | Duplicated homeodomain-like superfamily protein                                                          |
| CaSSR150    | (ATC)7                       | ACCGTTCCTAGGACGACCA              | TGAGTGAAGATGATGACGGC             | 59.8                              | 216                            | Genic            | Ca3         | 39398787                | WTF1                                                                                                     |
| CaSSR151    | (AG)7                        | GGTTTTGAGCGTGGTTTGAT             | TGCAAATGTGAAGCACAGA              | 59.0                              | 146                            | Genic            | Ca3         | 39618754                | Expressed protein                                                                                        |
| CaSSR152    | (AG)9(GT)6                   | TAGGTTTGTGTGTGGGTCG              | CCCTcACTCAGCGGTCTATC             | 59.5                              | 142                            | Genomic          | Ca3         | 39804933                |                                                                                                          |
| CaSSR153    | (GAA)5                       | AGGAGGAGGTAGATATGATGG            | CAAGTCTGTTCCAGTTCCCTA            | 54.8                              | 156                            | Genic            | Ca3         | 39817055                | NGATHA3 (NGA3)                                                                                           |
| CaSSR154    | (TATCAA)4                    | CCAAGGTCTAACTCACACTCA            | TAGAAAGGAAGTGTGATGAGC            | 55.4                              | 134                            | Genic            | Ca3         | 39817471                | NGATHA3 (NGA3)                                                                                           |
| CaSSR155    | (AAGA)6                      | ACTTCAGTGCTGTTGATTG              | CCAACCTAACAACTTGGAAAC            | 55.6                              | 155                            | Genic            | Ca3         | 39818017                | NGATHA3 (NGA3)                                                                                           |
| CaSSR156    | (AT)14                       | TGGAGAGGAATTGTTAcGTGG            | GCTTCCAATCAATAAAGTCTTACAA        | 60.0                              | 222                            | Genomic          | Ca3         | 39849058                |                                                                                                          |
| CaSSR157    | (TCA)6                       | CGCAACTTCTCCCTTTCATC             | TCATGGATTTCCTTGCCTC              | 60.0                              | 248                            | Genic            | Ca3         | 39872382                | endonuclease                                                                                             |
| CaSSR158    | (TTTA)7                      | TTAGGCGCCTCACTTTTTT              | TGTTCAATTCATCGGAAAC              | 59.9                              | 243                            | Genomic          | Ca3         | 39872629                |                                                                                                          |
| CaSSR159    | (CTT)17                      | CCGACCCAAcATTTTCATTT             | TGCTGGAACGAAACATTCAAC            | 59.7                              | 174                            | Genomic          | Ca4         | 820341                  |                                                                                                          |
| CaSSR160    | (TTGG)3                      | TTATGAAAATGATGGGTTGTC            | AGACAACAGTGCCAAACTAAG            | 55.0                              | 156                            | Genic            | Ca4         | 1103152                 | NAC domain containing protein 74 (NAC074)                                                                |
| CaSSR161    | (CAA)5                       | CGGTGATGAACCTGTTGTTG             | AAGCCACTCAAGACGCTGTT             | 60.1                              | 234                            | Genic            | Ca4         | 1206702                 | 12S seed storage protein                                                                                 |
| CaSSR162    | (ATC)4                       | CAAGAAGTTTCTTCCACTTCA            | CCAATCCATACTCTAACACCA            | 54.7                              | 155                            | Genic            | Ca4         | 1220485                 | ERF (ethylene response factor)                                                                           |
| CaSSR163    | (TA)8                        | TGTGCACATGACAATTAGAGCA           | TTTCCATCAAGAACACGTCG             | 60.3                              | 221                            | Genomic          | Ca4         | 2543168                 |                                                                                                          |
| CaSSR164    | (TTA)5                       | AGATCCACCTCCACCTTGTG             | TTGGAGGTTGTGTTGGGA               | 60.0                              | 185                            | Genic            | Ca4         | 2688512                 | AT-hook motif nuclear-localized protein 20 (AHL20)                                                       |
| CaSSR165    | (AG)10                       | GTTAGGGATTTGTGCGGAGCA            | CAACGGTCACCTTTTTGGTT             | 60.1                              | 217                            | Genomic          | Ca4         | 3603795                 |                                                                                                          |
| CaSSR166    | (TA)8                        | CCACCTTTCCCATCACTCA              | TCATGGAGAAATCCCAGATCC            | 59.8                              | 271                            | Genic            | Ca4         | 4594795                 | AT-hook motif nuclear-localized protein 19 (AHL19)                                                       |
| CaSSR167    | (AG)6                        | GGGCAGTGAGAGATGAGAGG             | CCTCACCTTTTACCACAA               | 59.8                              | 148                            | Genic            | Ca4         | 4699818                 | Nuclear protein that mediates light regulation of seedling development in a phytochrome-dependent manner |
| CaSSR168    | (GATTCA)6                    | TGCAACTAGAGAAAGCTATGG            | TGCGTTTTCTTTTAGTGCTTA            | 55.1                              | 156                            | Genic            | Ca4         | 4799223                 | ATRX                                                                                                     |
| CaSSR169    | (GATTCA)6                    | TGCAACTAGAGAAAGCTATGG            | TGCGTTTTCTTTTAGTGCTTA            | 55.1                              | 156                            | Genic            | Ca4         | 4799223                 | ATRX                                                                                                     |
| CaSSR170    | (AAT)4                       | GAGAAAGAGGATATTGGGAGA            | CTAACTCCAACATTCCTTGTG            | 55.0                              | 151                            | Genic            | Ca4         | 5080649                 | Duplicated homeodomain-like superfamily protein                                                          |
| CaSSR171    | (ATA)10                      | CGGTTTGTACTGAACCTTGAA            | CTTTGTCAACCAATAAATCGTC           | 55.6                              | 150                            | Genic            | Ca4         | 5081312                 | Duplicated homeodomain-like superfamily protein                                                          |
| CaSSR172    | (AAT)7                       | GTAGTGCAGATAAATGCAAGG            | CAAGTTCAGTAACAACCGATA            | 55.2                              | 141                            | Genic            | Ca4         | 5081434                 | Duplicated homeodomain-like superfamily protein                                                          |
| CaSSR173    | (CAA)4                       | GACTATTCAATCCACTGGTCA            | TTGAAATCAGTTACCTTCTCG            | 55.1                              | 159                            | Genic            | Ca4         | 5571877                 | UDP-Glycosyltransferase superfamily protein                                                              |
| CaSSR174    | (ATC)4                       | AGATGATGATCACAAACATCC            | TTGAAGTGAAGGAGATGAAGA            | 54.8                              | 142                            | Genic            | Ca4         | 5736891                 | indeterminate(ID)-domain 7 (IDD7)                                                                        |
| CaSSR175    | (AAC)4                       | TCATGACCTCATATCAAACC             | AGTTGCAGCAGATAAATGAAG            | 55.0                              | 160                            | Genic            | Ca4         | 5736936                 | indeterminate(ID)-domain 7 (IDD7)                                                                        |
| CaSSR176    | (ATG)8                       | TCAAAGGGAAGGATTTTGG              | AGGGTCCCTCAGTATTGCCT             | 60.0                              | 145                            | Genic            | Ca4         | 6590103                 | Major facilitator superfamily protein                                                                    |
| CaSSR177    | (CAA)7                       | CGGTGTGAATTTGGTGATGA             | CAACAACAACCGAACGAGTG             | 60.2                              | 253                            | Genic            | Ca4         | 7315077                 | Tetratricopeptide repeat (TPR)-like superfamily protein                                                  |
| CaSSR178    | (GAGAAA)4                    | TGAAACTTCAGAGGTTGGTAA            | GCTTCTTGCTCTTGTGTTC              | 55.0                              | 144                            | Genic            | Ca4         | 7561185                 | NAD(P)-binding Rossmann-fold superfamily protein                                                         |
| CaSSR179    | (TGG)8                       | ATCCGGTAAATCAACATGAAT            | CAGAACCAGTCTCATGTAA              | 55.9                              | 157                            | Genic            | Ca4         | 7970786                 | Zinc finger C-x8-C-x5-C-x3-H type family protein                                                         |
| CaSSR180    | (ACCCT)5                     | TTCTTAAACGACATCTTCAAC            | CAGTTTTCTTCCACAAAAGCTA           | 54.5                              | 153                            | Genic            | Ca4         | 8051984                 | TLP family                                                                                               |
| CaSSR181    | (ATG)7                       | GAAACTGAGCACTAGGAGTTG            | CTTCTCTCTGCTTCATCTTCA            | 54.3                              | 169                            | Genic            | Ca4         | 8052130                 | TLP family                                                                                               |
| CaSSR182    | (ATG)6                       | TAAACAACCGGGAAGTTGG              | CCCTTACGAATCCCATTTT              | 60.0                              | 137                            | Genic            | Ca4         | 8052218                 | TLP family                                                                                               |
| CaSSR183    | (GA)9                        | GAATCAGAAGTGGTTGGGA              | TTCGTGCCAGAACAGTGAG              | 60.0                              | 155                            | Genic            | Ca4         | 9314839                 | protein with a DWD motif                                                                                 |
| CaSSR184    | (TA)8                        | TGCATCTCGCTTGAATATG              | CCACACATGCCCTACTCTT              | 60.0                              | 214                            | Genic            | Ca4         | 11051159                | NAC domain containing protein 16 (NAC016)                                                                |

| Marker IDs* | Microsatellite repeat-motifs | Forward Primer sequences (5'-3') | Reverse Primer sequences (5'-3') | Actual annealing temperature (°C) | Size (bp) of alleles amplified | Types of markers | Chromosomes | Physical positions (bp) | Putative functions                                                 |
|-------------|------------------------------|----------------------------------|----------------------------------|-----------------------------------|--------------------------------|------------------|-------------|-------------------------|--------------------------------------------------------------------|
| CaSSR185    | (GAT)4                       | AGGTTTTCAAGAAAAGTGGAC            | GAGGATCAATAACAGCATTG             | 55.1                              | 147                            | Genic            | Ca4         | 11053035                | NAC domain containing protein 16 (NAC016)                          |
| CaSSR186    | (ACC)5                       | ACTATTATGCACCCACTGAAG            | GCAGAGACGAAGAAGATGATA            | 54.5                              | 138                            | Genic            | Ca4         | 11573408                | Duplicated homeodomain-like superfamily protein                    |
| CaSSR187    | (GAA)7                       | TGCTGGTCTTGTAGCTGGTG             | GCAGCTTGTAAGGGTTTGG              | 59.7                              | 168                            | Genic            | Ca4         | 11658503                | Vacuolar iron transporter (VIT) family protein                     |
| CaSSR188    | (CTCATC)4                    | CCACTAATAACAAGGAAGCAAA           | AGTCGCTCTTATTGGACTTGT            | 54.8                              | 156                            | Genic            | Ca4         | 12023919                | Leucine-rich repeat protein kinase family protein                  |
| CaSSR189    | (CTCATC)4                    | CATTCTCAAATTCAAACCAC             | TGGAAAAAGAAAGACAATGAC            | 54.8                              | 136                            | Genic            | Ca4         | 12023936                | Leucine-rich repeat protein kinase family protein                  |
| CaSSR190    | (AAC)7                       | CCCAAAACATCAACAATCTTA            | CCTGTTGGAAATTTCTAGGTT            | 55.3                              | 132                            | Genic            | Ca4         | 12176090                | SCARECROW-like 8 (SCL8)                                            |
| CaSSR191    | (TCA)4                       | CTAACTGAACCACCAGCACTA            | AGAAGGAGAGGTGATAGGTTG            | 55.6                              | 146                            | Genic            | Ca4         | 13843207                | LUH   WD-40 repeat family protein                                  |
| CaSSR192    | (AG)9                        | AAAATTGGATTGGGAAAGGG             | TTTGCTACCAACCAACCC               | 59.8                              | 131                            | Genic            | Ca4         | 14340497                | tubulin alpha-6 chain                                              |
| CaSSR193    | (AT)13                       | GGGATGCATCTGCAAATTTTA            | TGAGTCCAATAAAACCCCA              | 59.9                              | 249                            | Genomic          | Ca4         | 15398881                |                                                                    |
| CaSSR194    | (AT)8                        | AACACCCACATAATGACCC              | TCATTTGACATTACCTCATT             | 59.9                              | 222                            | Genic            | Ca4         | 16478585                | Expressed protein                                                  |
| CaSSR195    | (ACTTGC)4                    | TGAACTCGTATCTTCTGCTTC            | ATCATGCTTCACAACCTCATC            | 54.8                              | 172                            | Genic            | Ca4         | 16650296                | ovate family protein 13 (OFP13)                                    |
| CaSSR196    | (ACTTGC)4                    | TGAACTCGTATCTTCTGCTTC            | ATCATGCTTCACAACCTCATC            | 54.8                              | 172                            | Genic            | Ca4         | 16650296                | ovate family protein 13 (OFP13)                                    |
| CaSSR197    | (TC)13                       | CGTCGTGCAGATCTTGATA              | GCGACGTCAGTAAACCCCT              | 60.0                              | 248                            | Genomic          | Ca4         | 16665218                |                                                                    |
| CaSSR198    | (AT)14                       | CAATTTCTCTCTATTGTTTGACA          | TGATTTCTGAGGATGCGAC              | 60.6                              | 250                            | Genomic          | Ca4         | 17043109                |                                                                    |
| CaSSR199    | (CCA)6                       | CCAAGTGGCAAAAGCTTCG              | GTTTGCAGGTTTGAGCTTCC             | 59.9                              | 273                            | Genic            | Ca4         | 17663778                | RING-H2 protein that interacts with the RING finger domain of COP1 |
| CaSSR200    | (AT)9                        | AACAGGAAATGACTTGCCTTCA           | TTTAGGGATGATTGCTTGGG             | 59.0                              | 228                            | Genomic          | Ca4         | 17704840                |                                                                    |
| CaSSR201    | (ATT)8                       | TCTTTGAGACTGTTTTCCCTTT           | CATGTCTCATATTCTCTAGCTGC          | 58.5                              | 115                            | Genomic          | Ca4         | 19856773                |                                                                    |
| CaSSR202    | (ATTCT)4                     | GGGTCATCATCAAACCA                | AGTTCTGAAGTCATGGTAGGG            | 54.9                              | 147                            | Genic            | Ca4         | 20436604                | TCP family transcription factor                                    |
| CaSSR203    | (TTG)9                       | CAGGAGTTGAAACTGAAACAC            | TCCACAACAACAACACAGTA             | 54.9                              | 155                            | Genic            | Ca4         | 22196748                | embryo sac development arrest 31 (EDA31)                           |
| CaSSR204    | (TA)10                       | AACCCATCATTGCGCATGT              | CCTGGAAAACCTGCAACTGG             | 60.1                              | 155                            | Genomic          | Ca4         | 22226606                |                                                                    |
| CaSSR205    | (TA)10                       | GGGGATTGTCAGAAACGGTA             | TTGTGACACATCCTCTCAA              | 59.8                              | 223                            | Genomic          | Ca4         | 26366347                |                                                                    |
| CaSSR206    | (TCA)6                       | ACCACCACTGCCTCTTGTTTC            | CTCCAACAACCTCCACAGTT             | 60.0                              | 149                            | Genic            | Ca4         | 26873093                | Expressed protein                                                  |
| CaSSR207    | (AG)13                       | CACAATCATCATCGAGCACC             | ACACACTCCTCACCGCTTCT             | 60.1                              | 222                            | Genomic          | Ca4         | 27187560                |                                                                    |
| CaSSR208    | (AG)7                        | TCCACACAGACATGGTTTCATC           | CCTCATGGAAGCAACCTTA              | 60.1                              | 207                            | Genic            | Ca4         | 28594218                | AT-hook motif nuclear-localized protein 20 (AHL20)                 |
| CaSSR209    | (CAG)6                       | TGGCATCATCATCTGCTT               | CCATCCTTTTCAATGCGAGT             | 60.1                              | 253                            | Genic            | Ca4         | 30414975                | cobalt ion binding                                                 |
| CaSSR210    | (AT)9                        | TGTGAACCTTTTCATTGGCTTG           | CCATTGATCATGGGTAGTAGTT           | 60.1                              | 205                            | Genomic          | Ca4         | 30455676                |                                                                    |
| CaSSR211    | (AAT)7                       | CCCCACAACCTCAAAGTAAG             | GCTGCATTTTACCCTACAA              | 58.6                              | 265                            | Genomic          | Ca4         | 32335239                |                                                                    |
| CaSSR212    | (ATGGT)3                     | TCCCATCAAGATGCTAAAATA            | AATCAATCTTTGAGTTGTTGC            | 55.0                              | 149                            | Genic            | Ca4         | 32780320                | SHY2/IAA3 regulates multiple auxin responses in roots              |
| CaSSR213    | (CAA)5                       | AAACAACCTAACGCCGTAACCTA          | TTGGCATACTGATTCTTCTTC            | 54.5                              | 153                            | Genic            | Ca4         | 35416175                | TCP family transcription factor                                    |
| CaSSR214    | (CCATT)4                     | TTCAATTTAGCTTGAAAGCACTC          | GGTTGAGGAGAAAATTAAGC             | 55.0                              | 150                            | Genic            | Ca4         | 35417258                | TCP family transcription factor                                    |
| CaSSR215    | (TCC)5                       | AAACACAGATGTCGTCGCAA             | CACTGATATTCGGCAACACG             | 60.1                              | 156                            | Genic            | Ca4         | 36155130                | Plant protein of unknown function (DUF827)                         |
| CaSSR216    | (CAC)6                       | CGTCGTTCCACATACCAAACG            | CCAGAAGGAGATCCTGAACG             | 59.8                              | 207                            | Genic            | Ca4         | 36842702                | Putative plant-specific transcriptional regulator                  |
| CaSSR217    | (CAC)8                       | CTAAGAATGGAATTGGGATT             | CTCGTTTGTGCTCTATTGT              | 55.0                              | 153                            | Genic            | Ca4         | 36842734                | Putative plant-specific transcriptional regulator                  |
| CaSSR218    | (GAT)4                       | TGAAGTTGAGAGGTTAATTGG            | TCATCACACATAGAGCCTTTT            | 54.6                              | 151                            | Genic            | Ca4         | 36952282                | indeterminate(ID)-domain 5 (IDD5)                                  |
| CaSSR219    | (TA)13                       | CTTCAACCCACCAGCTACT              | CTCACTTCTCCGTCTCTGC              | 60.2                              | 271                            | Genomic          | Ca4         | 38376225                |                                                                    |
| CaSSR220    | (ATAA)7                      | TCTCCTTTCCCTCTAGTAATTTGTG        | TTTGTTTTAAATTTGCACTTCAACA        | 59.3                              | 272                            | Genomic          | Ca4         | 39006837                |                                                                    |
| CaSSR221    | (TA)9                        | CATTCCACCTTAAACTCCTCG            | CCGTCTAACTAAGATGAACCCCTG         | 60.0                              | 199                            | Genomic          | Ca4         | 39226042                |                                                                    |
| CaSSR222    | (TA)6                        | ATAGCAGCAAATCCTCAGCG             | GCTCATTGAAGATGACATTGC            | 58.3                              | 273                            | Genic            | Ca4         | 39805351                | putative c-myb-like transcription factor                           |
| CaSSR223    | (TC)9                        | TGTATGTAGGCTTGGGGAGG             | ATCCAGATGATGCCCTACA              | 59.9                              | 170                            | Genomic          | Ca4         | 40276977                |                                                                    |
| CaSSR224    | (CT)7                        | CCTCAAGTGCAACAAAACAA             | TGCAACATTTTACACCAGA              | 60.1                              | 124                            | Genic            | Ca4         | 40670097                | CCT motif family protein                                           |
| CaSSR225    | (CAG)5                       | TGCAACAGATGTTGTACAGA             | GAGATGAGCCTATCCCTAC              | 55.3                              | 170                            | Genic            | Ca4         | 41865067                | LEUNIG                                                             |

| Marker IDs* | Microsatellite repeat-motifs | Forward Primer sequences (5'-3') | Reverse Primer sequences (5'-3') | Actual annealing temperature (0C) | Size (bp) of alleles amplified | Types of markers | Chromosomes | Physical positions (bp) | Putative functions                                                               |
|-------------|------------------------------|----------------------------------|----------------------------------|-----------------------------------|--------------------------------|------------------|-------------|-------------------------|----------------------------------------------------------------------------------|
| CaSSR226    | (CAG)4                       | AATTAAGGCTAGGGAACAACA            | CATGCCTCTGTAAACAACATCT           | 55.7                              | 143                            | Genic            | Ca4         | 41865183                | LEUNIG                                                                           |
| CaSSR227    | (TA)12                       | ATGCCATTCTTGCCTGATTT             | TCAAATGCAGCAACAACAAA             | 59.5                              | 269                            | Genomic          | Ca4         | 42025608                |                                                                                  |
| CaSSR228    | (ACA)4                       | GTTTGGATGCATAACAACAAG            | CTCAGATTTCATATCAGCTTT            | 55.8                              | 153                            | Genic            | Ca4         | 43462315                | homeobox protein 34 (HB34)                                                       |
| CaSSR229    | (GAA)5                       | GAAAGAAGATCACAGCCTTT             | CAAAGGTATCTTGAGTGGTTG            | 55.3                              | 155                            | Genic            | Ca4         | 43513782                | basic helix-loop helix transcription factor involved in tapetal cell development |
| CaSSR230    | (GAA)8                       | TAGTTGCTGCCTTOGGAAC              | GGCGGATACTACTTTGTGCGC            | 59.7                              | 200                            | Genic            | Ca4         | 43715230                | Ubiquitin-like superfamily protein                                               |
| CaSSR231    | (AATTA)4                     | AATGAATTGGTTTGTCTGTG             | CTTACTCACCCGATCCTAACT            | 55.2                              | 148                            | Genic            | Ca4         | 43891008                | A class II knotted1-like homeobox gene family                                    |
| CaSSR232    | (AGA)8                       | GTTTATGGTGTGAAGGTTGA             | TACTCTACGCTTCTTCCCTCT            | 55.2                              | 149                            | Genic            | Ca4         | 43891170                | A class II knotted1-like homeobox gene family                                    |
| CaSSR233    | (AT)10                       | GTAAGCCAACCTTCCTTGCCA            | AACCCACAACCACTTCCATC             | 60.2                              | 196                            | Genomic          | Ca4         | 44581810                |                                                                                  |
| CaSSR234    | (ATG)5                       | AATGTTTCAATTTCAATGGGA            | GGATCGGTTATCGACTGAGG             | 59.5                              | 189                            | Genic            | Ca4         | 44625382                | Expressed protein                                                                |
| CaSSR235    | (AG)10                       | GGACACACAACAGAGAGAAAA            | ACGAGAGTTGTAAGGAGTACC            | 55.3                              | 167                            | Genic            | Ca4         | 44660343                | AL4 the Alfin-Like family of nuclear-localized PhD domain                        |
| CaSSR236    | (CAT)6                       | TCGCATAGAAGATGTCGTCG             | ACGCTACTCGATGACGAGGT             | 59.9                              | 152                            | Genic            | Ca4         | 45074489                | protein containing N-terminal tripartite nucleotide binding site                 |
| CaSSR237    | (ATTT)9                      | GCTTCAGAATTCGACGTGGT             | TACATTGGGCTGGTACATGG             | 60.3                              | 105                            | Genomic          | Ca4         | 45108920                |                                                                                  |
| CaSSR238    | (TGAA)3                      | ATGGAGGAAATTCGAAACAT             | AAGGAACTGTCTGTTGAAA              | 55.2                              | 150                            | Genic            | Ca4         | 45186457                | transcription factor involved in photomorphogenesis                              |
| CaSSR239    | (TAT)12                      | GGGTGTGGATAGCAATGGTT             | AGCTCAATGCCAGGAAGAA              | 60.0                              | 274                            | Genic            | Ca4         | 45445913                | Putative homolog of the Blind gene in tomato                                     |
| CaSSR240    | (GTA)5                       | GGCGGAATAATTGAAGTAGTAG           | GTTGTGATCAAAAGTATTGC             | 55.0                              | 158                            | Genic            | Ca4         | 45595013                | Growth regulating factor, transcription activator                                |
| CaSSR241    | (GT)7                        | TTTTGTAGCGTTTGTGTTTGG            | CATAAAACCGCCTGCAACTT             | 60.1                              | 203                            | Genic            | Ca4         | 46259055                | F-box protein                                                                    |
| CaSSR242    | (TC)10                       | CGTAACCGAGGAGTTTGAA              | AAGGGCGTTGAAAGAAAGAA             | 58.9                              | 217                            | Genic            | Ca4         | 46269177                | Mannose-P-dolichol utilization defect 1 protein                                  |
| CaSSR243    | (AGATGA)3                    | CGATGAATCAAGAAGCAATA             | TGAACCTAACCAAAATCTTGA            | 55.7                              | 159                            | Genic            | Ca4         | 46398833                | DREB subfamily A-5 of ERF/AP2 transcription factor family (RAP2.1)               |
| CaSSR244    | (AG)10                       | AATCAGAAGCGGAGTGGTTG             | AATGGAGGCGGGGAGAGTAAT            | 60.3                              | 266                            | Genomic          | Ca4         | 46457612                |                                                                                  |
| CaSSR245    | (TTA)21                      | ACAGAGCCACCAGGATTGTT             | GAAACTGGCCAGACGTTTTT             | 59.6                              | 225                            | Genomic          | Ca4         | 46788418                |                                                                                  |
| CaSSR246    | (CT)7(AT)7                   | ATCTCGCCAATAACCAACCAC            | GGTAGCTAGTTGATCAAGTCTTTCTT       | 59.8                              | 197                            | Genomic          | Ca4         | 47266711                |                                                                                  |
| CaSSR247    | (GAA)7                       | TGACATCTCCAACAACAAGAT            | CACACTGTGGATTCTTGCTC             | 55.6                              | 147                            | Genic            | Ca4         | 48124978                | BEL1-like homeodomain 7 (BLH7)                                                   |
| CaSSR248    | (ATA)6                       | GGCTATGCCAACCATTCTGT             | TGAAGTAGGCCAATGCAACA             | 60.3                              | 248                            | Genic            | Ca4         | 48145725                | cytosolic thioredoxin                                                            |
| CaSSR249    | (TAAA)5                      | AAAGCATGCACTAATCACAGT            | CAAGTCTTTGTCATCTTTGCT            | 55.1                              | 139                            | Genic            | Ca4         | 48319615                | Basic-leucine zipper (bZIP) transcription factor family protein                  |
| CaSSR250    | (TC)9(T)10                   | TTACATGAAAAATAAAAaCAAGCAA        | CCGGAAGATTTAGCAATGGA             | 57.3                              | 199                            | Genomic          | Ca4         | 48825962                |                                                                                  |
| CaSSR251    | (GAT)6                       | ATGAGTCAAAGCCATAGTCAC            | TTCTTCTCAGTTGGATGAAA             | 54.4                              | 153                            | Genic            | Ca5         | 164592                  | LONG VEGETATIVE PHASE 1 (LOV1)                                                   |
| CaSSR252    | (TCCC)3                      | CGAGTATACAAGAGAGCAGGA            | AGCTGCCTTATTAGAGTGCC             | 54.9                              | 147                            | Genic            | Ca5         | 166052                  | LONG VEGETATIVE PHASE 1 (LOV1)                                                   |
| CaSSR253    | (CAA)5                       | TGACAACAGTCTTGTGCTTTT            | GGGAGAGGGAGTAACAAGTA             | 54.9                              | 154                            | Genic            | Ca5         | 166287                  | LONG VEGETATIVE PHASE 1 (LOV1)                                                   |
| CaSSR254#   | (AATCCA)5                    | ATTCAGCAGTTAGTTCCAACA            | GCATCAGCAAAGTAGACAAAT            | 55.1                              | 147                            | Genic            | Ca5         | 166458                  | LONG VEGETATIVE PHASE 1 (LOV1)                                                   |
| CaSSR255    | (CTTTG)5                     | AATGGAGAAAAAGCAGAAGAC            | GCGTAAACTAGATGGCTGATA            | 55.3                              | 144                            | Genic            | Ca5         | 222915                  | homeobox protein 31 (HB31)                                                       |
| CaSSR256    | (TA)11                       | ATTGGGAATTCAGCGTTTCC             | ACTGAGAATTGGGGTCgTTG             | 61.2                              | 280                            | Genomic          | Ca5         | 7247789                 |                                                                                  |
| CaSSR257    | (ATTA)3                      | AACATGATGGAAGATGGAAC             | TGGTCACTTGGGCTAATG               | 54.8                              | 147                            | Genic            | Ca5         | 7675104                 | a MADS box transcription factor expressed in the carpel and ovules               |
| CaSSR258    | (CT)15                       | TCTGCCTCGTACTCCTCACA             | GGTGTGTGCTGGCATTITCT             | 59.6                              | 247                            | Genomic          | Ca5         | 8866821                 |                                                                                  |
| CaSSR259    | (TGT)4                       | TTGTTGATGTTGATGTTGCT             | CCTATCAACCTATCGAACCTT            | 55.0                              | 144                            | Genic            | Ca5         | 9961600                 | WRKY transcription factor 2                                                      |
| CaSSR260    | (TGC)5                       | ATTGATGATGAACCATTATGC            | ACAACAACAACATCAACAACA            | 54.9                              | 144                            | Genic            | Ca5         | 9961692                 | WRKY transcription factor 2                                                      |
| CaSSR261    | (ATA)6                       | TCGTCATAGTTTCAAGCGGT             | CAGGAGGTGCACTATCAGCA             | 60.0                              | 149                            | Genic            | Ca5         | 9989246                 | chloride channel protein                                                         |
| CaSSR262    | (TTC)9                       | TGCTATTGTGATTCAAGTTCT            | AGCATGACAAGTTTAAAAGCA            | 55.0                              | 147                            | Genic            | Ca5         | 10080588                | myb family transcription factor                                                  |
| CaSSR263    | (AG)16                       | CAGAAAACAACCAAAACCGA             | TGCTCATGCATTTCAACCTC             | 60.0                              | 191                            | Genomic          | Ca5         | 10184550                |                                                                                  |

| Marker IDs* | Microsatellite repeat-motifs | Forward Primer sequences (5'-3') | Reverse Primer sequences (5'-3') | Actual annealing temperature (°C) | Size (bp) of alleles amplified | Types of markers | Chromosomes | Physical positions (bp) | Putative functions                                                              |
|-------------|------------------------------|----------------------------------|----------------------------------|-----------------------------------|--------------------------------|------------------|-------------|-------------------------|---------------------------------------------------------------------------------|
| CaSSR264    | (CTT)7                       | TCCAAAACACATTCACAAGCA            | TATGGATCGGAAGACGAACC             | 60.1                              | 245                            | Genomic          | Ca5         | 11065299                |                                                                                 |
| CaSSR265    | (CTT)6                       | CCAAAACCATTTCCTTCAATC            | TATGGATCGGAAGACGAACC             | 59.9                              | 191                            | Genic            | Ca5         | 11065353                | Plant invertase/pectin methylesterase inhibitor superfamily                     |
| CaSSR266    | (AG)14                       | CGAATAAATTTGGCGGAGAA             | AAGCATCCAAATTGGCAAAG             | 60.0                              | 275                            | Genomic          | Ca5         | 12476511                |                                                                                 |
| CaSSR267    | (GT)9(AT)6                   | AAGACATTATGAAATGCAACCAA          | TGAGAGATGCATTCAACATTATAGG        | 59.8                              | 250                            | Genomic          | Ca5         | 12592203                |                                                                                 |
| CaSSR268    | (AAT)10                      | TGATTTCTCCATCTIATCGGG            | ATTAGGCGCTTACGACATCC             | 59.0                              | 259                            | Genomic          | Ca5         | 14185310                |                                                                                 |
| CaSSR269    | (ATT)8                       | AAAaGAACAAAATGGAAGCCC            | TGGATGCAAAAGATTGAGC              | 59.5                              | 266                            | Genomic          | Ca5         | 15878709                |                                                                                 |
| CaSSR270    | (AT)10                       | TCACGTCCATTAATCATCAATTC          | AGTGATAACCGTTGGAAAAGC            | 59.2                              | 280                            | Genomic          | Ca5         | 17120195                |                                                                                 |
| CaSSR271    | (CAC)4                       | CTTATGACATGAGGAAGCAAC            | ATTTCTCTCACAATCAAATGG            | 55.0                              | 150                            | Genic            | Ca5         | 19048743                | Acyl-CoA N-acyltransferases (NAT) superfamily protein                           |
| CaSSR272    | (TCA)4                       | CAAGATTATCATTTGGACGAC            | AAATGGTGCTAATTTGGATCT            | 54.7                              | 150                            | Genic            | Ca5         | 21386676                | Pseudo response regulator involved in the generation of circadian rhythms, TOC1 |
| CaSSR273#   | (AT)10                       | CCTTTATAAAAaGAGGTGGGgT           | GTGGGTGCAAGGAAGATTG              | 57.7                              | 201                            | Genomic          | Ca5         | 23012241                |                                                                                 |
| CaSSR274    | (AT)12                       | TGCTTAAAGAATTTGAAACGATGA         | CATTAGCCCTCGTTGGCATT             | 60.1                              | 210                            | Genomic          | Ca5         | 23438498                |                                                                                 |
| CaSSR275    | (AG)13                       | TACAAAAGAATCAAACCCAAG            | TTTCTCCACAATTCTCGTTA             | 54.6                              | 165                            | Genic            | Ca5         | 23874393                | BTB/POZ domain-containing protein                                               |
| CaSSR276    | (AAT)7                       | TCCACTTCACCACATCATCA             | TGCATATTTGACCTGCAT               | 59.0                              | 209                            | Genic            | Ca5         | 24717518                | Homeodomain-like transcriptional regulator                                      |
| CaSSR277    | (AT)10                       | AACCGTTCACAGTAGAGGCA             | CCCTATGTCCCAAAGCTACG             | 58.4                              | 147                            | Genomic          | Ca5         | 26329409                |                                                                                 |
| CaSSR278    | (GAT)7                       | TGAGGGTACTCCTAAACCCG             | CCCCCTTCTTTTCTTCAAC              | 59.0                              | 180                            | Genomic          | Ca5         | 26833175                |                                                                                 |
| CaSSR279    | (GAAA)3                      | AGCTATGCCTCCTGATAAACT            | GAGTAGTGGCTTCTGTTTGAA            | 55.0                              | 167                            | Genic            | Ca5         | 27118508                | basic leucine-zipper 52 (bZIP52)                                                |
| CaSSR280    | (CCT)4                       | AAGTAAACCACACGAGTTCCT            | TATGAAGCTTTCACATCAGG             | 55.5                              | 144                            | Genic            | Ca5         | 27757413                | auxin response factor family protein                                            |
| CaSSR281    | (AAT)8                       | GCACATAGCAGTTACATATGGCAG         | TACTTTTGCACCTCGGTTCC             | 60.9                              | 265                            | Genomic          | Ca5         | 28955959                |                                                                                 |
| CaSSR282    | (AT)7                        | CACAGCAACAGAAGTGGCAT             | TTCATGGCACAAGAAGTTGC             | 59.8                              | 267                            | Genic            | Ca5         | 29319100                | protein, expressed in leaves, with similarity to pollen allergens.              |
| CaSSR283    | (CCTTCT)3                    | AGTTCTTCCACAAATTC AACCC          | CCAAGAACAGAACAAGAAGAA            | 55.8                              | 152                            | Genic            | Ca5         | 29398059                | DREB subfamily A-6 of ERF/AP2 transcription factor family (RAP2.4)              |
| CaSSR284    | (CTT)5                       | TTCTCTTCCATCAATGACTT             | GCGAAAAGTTGGTTGAAAA              | 60.1                              | 155                            | Genic            | Ca5         | 29465178                | Contains a weak similarity to ELG protein from Homo sapiens                     |
| CaSSR285    | (TCTTGC)3                    | TCITTTATCTTCTGCAAAACCA           | CAAGAGCAAGAACAAGAAGAG            | 55.3                              | 149                            | Genic            | Ca5         | 30587088                | nucleic acid binding                                                            |
| CaSSR286    | (CTTCTC)4                    | TTTCATCGTCTACTTGATGGT            | TTGATGGTAGAGCAAGAACAT            | 54.8                              | 157                            | Genic            | Ca5         | 30587245                | nucleic acid binding                                                            |
| CaSSR287    | (CTTCTC)4                    | TTTCATCGTCTACTTGATGGT            | TTGATGGTAGAGCAAGAACAT            | 54.8                              | 157                            | Genic            | Ca5         | 30587245                | nucleic acid binding                                                            |
| CaSSR288    | (TTCTCC)3                    | TTTCATCGTCTACTTGATGGT            | TTGATGGTAGAGCAAGAACAT            | 54.8                              | 157                            | Genic            | Ca5         | 30587245                | nucleic acid binding                                                            |
| CaSSR289    | (TAT)7                       | ACGCCTCTTTGCTCCTTTT              | AGTCAAGCCTCACTCCAGA              | 60.4                              | 250                            | Genomic          | Ca5         | 31109261                |                                                                                 |
| CaSSR290    | (TTC)5                       | ATGAAATTGCTCCGTTGAGG             | GGGATTTGATTCGTGGAAGA             | 59.9                              | 258                            | Genic            | Ca5         | 31182241                | Calcium-binding EF hand family protein                                          |
| CaSSR291    | (ATG)6                       | CATGAAGGCCTATAACAAGAA            | GAGCTTCTACTCGTCATCATC            | 54.7                              | 145                            | Genic            | Ca5         | 31194921                | HMGB (high mobility group B) protein                                            |
| CaSSR292    | (ATT)9                       | AATTAGGGTTGGATGGAGGG             | CTTCCGAACCACTACGCTTC             | 59.9                              | 175                            | Genic            | Ca5         | 31744505                | RING/FYVE/PHD zinc finger superfamily protein                                   |
| CaSSR293    | (TC)6(TA)8                   | TCAATCTCCATCTTCCCTG              | CAACAAGTCCCCACCAATA              | 60.0                              | 222                            | Genomic          | Ca5         | 31861702                |                                                                                 |
| CaSSR294    | (TG)7                        | TTTTTCCCTTTATCGCATGG             | TAGGGGAAGGCAAAATGTACG            | 60.0                              | 145                            | Genic            | Ca5         | 32856391                | Expressed protein                                                               |
| CaSSR295    | (CGG)5                       | CTGAGGATTTTGAATGAAC              | TCATCTACACTCCGATCTCAC            | 54.0                              | 145                            | Genic            | Ca5         | 34050111                | WRKY Transcription Factor                                                       |
| CaSSR296    | (TAT)8                       | CCAGTTGTTGCCTCGGTATT             | CAGGTTGATGTCCGAATGTG             | 60.0                              | 273                            | Genic            | Ca5         | 34521276                | Expressed protein                                                               |
| CaSSR297    | (AAG)10                      | CCAGCCATGGTAATTTGGAC             | TTCTACAACCGTTTTTCTCTCG           | 60.2                              | 204                            | Genomic          | Ca5         | 34626059                |                                                                                 |
| CaSSR298    | (ATAA)9                      | TTGGTTGCTAGACCAAGGG              | CGGAATCCGATTGCTTCTAC             | 60.1                              | 230                            | Genomic          | Ca5         | 35432669                |                                                                                 |
| CaSSR299    | (AG)6                        | AAGCATCAGAAGAATCAGACAGG          | CTTCTCCTCGAGATCCTCC              | 60.3                              | 220                            | Genic            | Ca5         | 35796488                | AGC (cAMP-dependent, cGMP-dependent and protein Putative protein kinase C)      |
| CaSSR300    | (CTTC)7                      | TCTAGAAGCTTCTACTTCACC            | CGAAAGTGAGTGTGAGAAAG             | 54.7                              | 163                            | Genic            | Ca5         | 35861292                | Heat Stress Transcription Factor (Hsf) family                                   |

| Marker IDs* | Microsatellite repeat-motifs | Forward Primer sequences (5'-3') | Reverse Primer sequences (5'-3') | Actual annealing temperature (°C) | Size (bp) of alleles amplified | Types of markers | Chromosomes | Physical positions (bp) | Putative functions                                                          |
|-------------|------------------------------|----------------------------------|----------------------------------|-----------------------------------|--------------------------------|------------------|-------------|-------------------------|-----------------------------------------------------------------------------|
| CaSSR301    | (TAT)5                       | CACTCCCTTCTCCCAAAAT              | CGCCTTTCGAATTATTGCAT             | 60.1                              | 212                            | Genic            | Ca5         | 36421460                | Trypan_PARP, Procyclic acidic repetitive protein (PARP)                     |
| CaSSR302    | (ATA)6                       | TCCATTTCCCTTCCTTTTCCTC           | GGTAGAAGGTGCTTGACCGA             | 60.3                              | 219                            | Genic            | Ca5         | 37739978                | Chondroitin sulphate attachment domain                                      |
| CaSSR303    | (TTG)4                       | GGTATGACCAGAACATTGAA             | AACATCAATTCAATCATGGAG            | 55.1                              | 142                            | Genic            | Ca5         | 37896821                | protein similar to a subunit of the CCAAT promoter motif binding complex    |
| CaSSR304    | (AT)10                       | AACAAGTCTGCAACAACCTTCT           | CACAAAGTGAAGGGGGTCAT             | 58.0                              | 270                            | Genomic          | Ca5         | 38903229                |                                                                             |
| CaSSR305    | (ACC)9                       | TTCTCTGAATCCAACGGTCC             | TGTGTGCGTGAGAGAAGAGG             | 60.2                              | 149                            | Genic            | Ca5         | 40667653                | Nodulin MtN21 /EamA-like transporter family protein                         |
| CaSSR306    | (AAC)7                       | CTCTTGCAACTTCCCCACTC             | AAAGCAAAGGAGGGTTTGGT             | 60.0                              | 150                            | Genic            | Ca5         | 41308534                | Expressed protein                                                           |
| CaSSR307    | (AG)6                        | ATGGTTTTGCTCACATTCTTA            | TCTCAATTCTCTTCAATTCCA            | 55.0                              | 151                            | Genic            | Ca5         | 42499312                | the MADs box transcription factor family                                    |
| CaSSR308    | (TC)11                       | CAGTGCCATCACTCCATCAC             | CACGCaAAAAAACCCACAG              | 60.1                              | 252                            | Genomic          | Ca5         | 42534709                |                                                                             |
| CaSSR309    | (GAA)4                       | GGAGGAAGAGGAAGAGAGAAT            | GAGAGGACCTCAATTTCTTGT            | 55.7                              | 172                            | Genic            | Ca5         | 44153203                | SWI3 gene family protein                                                    |
| CaSSR310    | (ATG)4                       | TATAAACCCAGCAAGTATTCG            | GTACCCATCAAATCAACTTCA            | 55.6                              | 146                            | Genic            | Ca5         | 45306950                | Homology Subgroup III                                                       |
| CaSSR311    | (TA)6                        | CCGGCTTAATGAAAGAGGAA             | GACCATGGGATGGATGTTTC             | 60.0                              | 209                            | Genic            | Ca5         | 45479771                | Expressed protein                                                           |
| CaSSR312    | (AG)8                        | AGAGTCAAATTAACAAGAGCATAGA        | AAAATGCCACAAGAGCAAAG             | 60.2                              | 122                            | Genic            | Ca5         | 46316346                | CYP714A                                                                     |
| CaSSR313    | (CAC)9                       | AACCCATTTTGCAACTGCTG             | CGCTGAGGAGAGAGTTCCAC             | 60.1                              | 124                            | Genic            | Ca5         | 46360697                | RING/U-box superfamily protein                                              |
| CaSSR314    | (CCATA)4                     | AAAACAACACTCTCCTCTTCC            | ACAGGTAGTGGGTATATCCAG            | 55.1                              | 143                            | Genic            | Ca5         | 47007215                | Transcription elongation factor (TFIIS) family protein                      |
| CaSSR315    | (CAA)7                       | CAAGCTCACACTGAACCTCTCT           | GTTGTTGAGTTGTGGTGATTT            | 54.8                              | 146                            | Genic            | Ca6         | 466443                  | KANADI protein (KAN)                                                        |
| CaSSR316    | (TCATTT)3                    | TCATAGATTCTTCTCCCTTCC            | TGGAAACTATAGATTTTGTGG            | 55.0                              | 156                            | Genic            | Ca6         | 1609131                 | DA1-related protein 2 (DAR2)                                                |
| CaSSR317    | (TTCTCT)3                    | CTCCACATCATTTTCATTTTC            | AAACCAGACTTCTTTCTGAG             | 54.7                              | 173                            | Genic            | Ca6         | 1609211                 | DA1-related protein 2 (DAR2)                                                |
| CaSSR318    | (TC)9                        | TAGGCATTTGCAACGCTATG             | TTTTGCGTTCCTTTTCTCCT             | 59.9                              | 202                            | Genomic          | Ca6         | 2111716                 |                                                                             |
| CaSSR319    | (TTG)7                       | TCACCATCGTGTGATGGACT             | TTGTTGGTCTCCTTTTGTTTT            | 59.9                              | 220                            | Genic            | Ca6         | 2501203                 | Expressed protein                                                           |
| CaSSR320    | (TTC)5                       | GCAGCAACATCTGGTGAGAA             | CGTTCAGAGGTCTAGGGTGC             | 59.9                              | 205                            | Genic            | Ca6         | 2549860                 | RING/U-box superfamily protein                                              |
| CaSSR321    | (TTA)15                      | TCCCTTCCCTCTTTTGTTT              | TGTTTGGAAAAGTGTGTTAGAGT          | 59.9                              | 203                            | Genomic          | Ca6         | 2766175                 |                                                                             |
| CaSSR322    | (AAAGAG)5                    | GATGCACATCATCTTCTTCTG            | GCAATATTGAAAATTCAGTGT            | 55.8                              | 147                            | Genic            | Ca6         | 3867508                 | NAC domain containing protein 75 (NAC075)                                   |
| CaSSR323    | (AT)12                       | CGTTTTTCATATTCAGGCC              | CGCATGCATACGGAACCTCTA            | 59.4                              | 187                            | Genomic          | Ca6         | 4048430                 |                                                                             |
| CaSSR324    | (AG)7(A)13                   | CATAAATGGTGGGACATGC              | TGACACAACAAAATCACCA              | 60.0                              | 168                            | Genomic          | Ca6         | 4400440                 |                                                                             |
| CaSSR325    | (TTTTTC)4                    | ACAACCTACTGTCGTTGGAAA            | ATTTCAAATCCTTCGTGAAAC            | 55.0                              | 147                            | Genic            | Ca6         | 4566075                 | Transcriptional co-activator                                                |
| CaSSR326    | (TTTTTC)4                    | ACAACCTACTGTCGTTGGAAA            | ATTTCAAATCCTTCGTGAAAC            | 55.0                              | 147                            | Genic            | Ca6         | 4566075                 | Transcriptional co-activator                                                |
| CaSSR327    | (TA)8                        | CGGGTAATGAAACTATAAATTA           | CAATGCCTGCATTCCAATTA             | 57.8                              | 274                            | Genomic          | Ca6         | 5169574                 |                                                                             |
| CaSSR328    | (CAA)5                       | AAGACCAAGTCAAGGACTTTC            | GAATACATATTCGTCGTCGTC            | 55.1                              | 144                            | Genic            | Ca6         | 5237484                 | Homeodomain protein                                                         |
| CaSSR329    | (ATC)7                       | TGTTCCCTTCTCATCTTCAAA            | TGATCTATTTTCTTGCCACAT            | 55.1                              | 151                            | Genic            | Ca6         | 5237688                 | Homeodomain protein                                                         |
| CaSSR330    | (CAA)5                       | TGTTCCCTTCTCATCTTCAAA            | TGATCTATTTTCTTGCCACAT            | 55.1                              | 151                            | Genic            | Ca6         | 5237688                 | Homeodomain protein                                                         |
| CaSSR331    | (TCT)8                       | GGCAGCACAACACTACAACAA            | TAATTGAGAATCGGGTTCGG             | 59.9                              | 199                            | Genic            | Ca6         | 5259895                 | BTB/POZ domain-containing protein                                           |
| CaSSR332    | (ATT)8                       | TCCTTGCCCTTGTCATAGTTA            | GGCCCTGTAGATGATGA                | 55.2                              | 121                            | Genic            | Ca6         | 6141841                 | Putative auxin response factor                                              |
| CaSSR333    | (GAA)8                       | TAATGAAAATTGTGGGAGAAG            | TGACCCTCTGTACTACTCAT             | 54.0                              | 153                            | Genic            | Ca6         | 6540055                 | Putative protein kinase similar to the calcium/calmodulin-dependent protein |
| CaSSR334    | (TTC)12                      | ATCACTTCTGGCCATGTCCC             | GGTGGTGAATGAGGAGAAA              | 59.9                              | 106                            | Genic            | Ca6         | 6540055                 | TT viral orf 1                                                              |
| CaSSR335    | (AAAT)12                     | CCGAATCCCTGTTGTAGGA              | ACTGCATGTTTGCCAGGTTT             | 59.9                              | 276                            | Genomic          | Ca6         | 6631430                 |                                                                             |
| CaSSR336    | (GA)9                        | TCACTCAAATgTAGCAATCAaa           | AATTATTGCCTGAGTTGCGG             | 57.5                              | 214                            | Genomic          | Ca6         | 7376505                 |                                                                             |
| CaSSR337    | (AT)8                        | TGCAGCAGAGCATCAAATCT             | GTTGTCTGAAGGTCCCCAAA             | 59.9                              | 135                            | Genic            | Ca6         | 7531996                 | Expressed protein                                                           |
| CaSSR338    | (AC)8                        | GCCACCGTTGTGTTCTTAT              | CGTTTTGAAAATCGGTGGT              | 59.8                              | 183                            | Genic            | Ca6         | 7645002                 | LIP1 gene small GTPase                                                      |
| CaSSR339    | (CT)20                       | TTTGGTGGTGAACGTTGAAA             | GGAGAAGGaAAAGGAAGGGA             | 60.0                              | 243                            | Genomic          | Ca6         | 8335176                 |                                                                             |
| CaSSR340    | (AAAAC)5                     | CGTTGCTTAAGATACCAAAAAC           | AGAGCTTCCAAGTCTCTTCAT            | 54.4                              | 179                            | Genic            | Ca6         | 8368375                 | homeodomain leucine zipper class I (HD-Zip I) protein                       |
| CaSSR341    | (TGA)9                       | TCATGGATTTCTTTGCTC               | CGCAACTTCTCCCTTTCATC             | 60.0                              | 248                            | Genomic          | Ca6         | 8816079                 |                                                                             |
| CaSSR342    | (AG)10                       | AGGTAGTTGAAGAAACGAACC            | AGAAGCAGGATCAATACCTTT            | 55.1                              | 153                            | Genic            | Ca6         | 9118284                 | Basic-leucine zipper (bZIP) transcription factor family protein             |

| Marker IDs* | Microsatellite repeat-motifs | Forward Primer sequences (5'-3') | Reverse Primer sequences (5'-3') | Actual annealing temperature (°C) | Size (bp) of alleles amplified | Types of markers | Chromosomes | Physical positions (bp) | Putative functions                                                                  |
|-------------|------------------------------|----------------------------------|----------------------------------|-----------------------------------|--------------------------------|------------------|-------------|-------------------------|-------------------------------------------------------------------------------------|
| CaSSR343    | (TGAT)4                      | TGATTGTGGATTCTTCGATAC            | CAACTAACACCAAGAAGCAAC            | 55.2                              | 150                            | Genic            | Ca6         | 10053750                | basic leucine-zipper 44 (bZIP44)                                                    |
| CaSSR344    | (CAG)8                       | AATCTCAGCCTCAAACCTCAAT           | GCTGTTGTGATTTTTGTTGTT            | 55.6                              | 147                            | Genic            | Ca6         | 12437191                | auxin response factor family protein                                                |
| CaSSR345    | (AC)12                       | TTCTTTTTGTTTCTCACCAAC            | CCTTTGGTGTAAGGACT                | 54.6                              | 138                            | Genic            | Ca6         | 12569883                | TEOSINTE BRANCHED 1, cycloidea and PCF transcription factor 2 (TCP2)                |
| CaSSR346    | (CCACTA)4                    | TTGCCATTATCATCTTCTTTC            | ATAAATTGCACAGAAGGTGTG            | 54.6                              | 141                            | Genic            | Ca6         | 13095585                | indeterminate(ID)-domain 14 (IDD14)                                                 |
| CaSSR347    | (AACACC)3                    | AGCTCATATCAAACATGTGG             | GGTTGTAATGTTGTTGCTTGT            | 55.3                              | 159                            | Genic            | Ca6         | 13096321                | Putative role in shoot gravitropism                                                 |
| CaSSR348    | (AGA)6                       | ATCGCGTGAAGGAGAGAGAG             | TACAACACCAACGACGCATT             | 60.0                              | 141                            | Genic            | Ca6         | 13949884                | Protein of unknown function DUF1084 (InterPro:IPR009457)                            |
| CaSSR349    | (AC)10                       | TGGCATCACAGATTTCAATG             | GCACTGCATGAGAAAGCCA              | 59.5                              | 251                            | Genomic          | Ca6         | 14059898                |                                                                                     |
| CaSSR350    | (TC)11                       | CGTTTCTCGCTCTGGAGGTA             | TTTCGTTGGTTACACGGTCA             | 60.0                              | 253                            | Genic            | Ca6         | 14301000                | A-type cyclin-dependent Putative protein kinase                                     |
| CaSSR351    | (AAT)27                      | TGAAAGTGTGTTTGAATAAATGATG        | GTGGCTACGGAAGTCTCCAA             | 59.7                              | 255                            | Genomic          | Ca6         | 14324174                |                                                                                     |
| CaSSR352    | (TTC)13                      | CTGCATCAACCACCAATC               | CAACGATAATGCACTCCCT              | 60.0                              | 136                            | Genic            | Ca6         | 14759107                | potassium transporter                                                               |
| CaSSR353    | (ATA)11                      | TTGAGCACAAAGTTTCTCTCT            | TCCCTTAATAGTAAATTC               | 55.2                              | 151                            | Genic            | Ca6         | 14811478                | basic helix-loop-helix (bHLH) DNA-binding superfamily protein                       |
| CaSSR354    | (AT)11                       | ATTGTTGGCAGTTGTGGTT              | CCGATTGTAGTGGGGCTAAT             | 60.3                              | 230                            | Genomic          | Ca6         | 15710297                |                                                                                     |
| CaSSR355    | (TCT)5                       | CATCAGTAACCGCTCAACGA             | TTTGGAGGTGGAAAGAGTGG             | 60.1                              | 244                            | Genic            | Ca6         | 16936979                | Ribosomal protein S5 family protein                                                 |
| CaSSR356    | (TA)10                       | ATCAGCACCTCATACCCGAG             | CGACAAGCCAGACTCATAA              | 60.1                              | 242                            | Genomic          | Ca6         | 17580949                |                                                                                     |
| CaSSR357    | (TAT)9                       | TATCCAAAAGTCACAATCA              | ATATGCAACACACAGGAAG              | 55.7                              | 141                            | Genic            | Ca6         | 18298837                | ERF (ethylene response factor) subfamily B-3 of ERF/AP2 transcription factor family |
| CaSSR358    | (AT)15                       | TTTTTCATCCATCACATCATCA           | TTGATGCTTTACAACGTCGC             | 59.9                              | 261                            | Genic            | Ca6         | 19858207                | F26K24.10 protein                                                                   |
| CaSSR359    | (ATT)15                      | CGGTTACCTATTTTTAATTGTGC          | TTCTCCATCACACTGGGAGA             | 57.0                              | 247                            | Genomic          | Ca6         | 20442770                |                                                                                     |
| CaSSR360    | (TTGATA)3                    | GTGGAAGTGAATTCAAGTGAG            | GTCCAACACCATAACAATCAT            | 54.8                              | 148                            | Genic            | Ca6         | 20514111                | SET domain protein 35 (SDG35)                                                       |
| CaSSR361    | (TTCACA)5                    | CCCACCTTCTCACTCACTCTT            | TTCTGGAGGAGATAGTAGTGGT           | 56.1                              | 163                            | Genic            | Ca6         | 22249411                | GRAS family transcription factor                                                    |
| CaSSR362    | (CAA)8                       | ACCATTGTTGGGCATTTTC              | CGAATTGAGGGTCTTCCAA              | 60.0                              | 274                            | Genic            | Ca6         | 23920468                | NTMC2T5.2                                                                           |
| CaSSR363    | (AGA)4                       | GGATTAATTATCTCCGACCAG            | TGGTAATCTCCAGCTATCAA             | 55.4                              | 122                            | Genic            | Ca6         | 24448426                | the R2R3 factor gene family                                                         |
| CaSSR364    | (TC)6                        | ACCAACTCACATCTAGAAGCA            | TGATCTTCCCATCTTATTTCA            | 55.0                              | 157                            | Genic            | Ca6         | 24448740                | the R2R3 factor gene family                                                         |
| CaSSR365    | (TAG)6                       | TGCAAAACCACTTTCTCTCTG            | CGAATCACAAAATCCATCCC             | 60.1                              | 140                            | Genic            | Ca6         | 26357912                | GRAS family Protein, transcription factor                                           |
| CaSSR366    | (TAG)7                       | AAGCCTCTATATTGCAAACC             | CAAAATCCATCCCTAGAACTT            | 55.4                              | 146                            | Genic            | Ca6         | 26357925                | GRAS family Protein, transcription factor                                           |
| CaSSR367    | (ACT)7                       | TGGATAACCCTTTTCTTCTTC            | AGCATTGGTTATGTAACGA              | 55.1                              | 145                            | Genic            | Ca6         | 26358317                | GRAS family Protein, transcription factor                                           |
| CaSSR368    | (AGAA)5                      | GTGATCTGTATCGTTTCAAT             | AGGAAGCTTTGAGAAAGAGAA            | 55.0                              | 141                            | Genic            | Ca6         | 26358709                | GRAS family Protein, transcription factor                                           |
| CaSSR369    | (AG)6                        | GCTATCGCCGATCAAGAGAA             | TTCTAAGCTTTGGAAGAGATCCA          | 59.5                              | 236                            | Genic            | Ca6         | 26765102                | Ras-related small GTP-binding family protein                                        |
| CaSSR370    | (ATT)8                       | AAAAaCCCGTGTGTTATTT              | AGGGCAATATGCGATTCATT             | 57.6                              | 256                            | Genomic          | Ca6         | 26878517                |                                                                                     |
| CaSSR371    | (AT)14                       | CCATGCTTGTGACGTTCTCT             | GCCTTTCTTTTCTTTGGGA              | 58.9                              | 279                            | Genomic          | Ca6         | 29119837                |                                                                                     |
| CaSSR372    | (GTG)4                       | GAGGAAGTTACAAAAGCAAC             | GGTTACATGTTTTGCATTCAT            | 55.7                              | 162                            | Genic            | Ca6         | 29256025                | C2H2-type zinc finger family protein                                                |
| CaSSR373    | (TAT)32                      | TiCACTTGTTCaAGTACAActATTiCA      | GGAATGTGCCAACATCAGAA             | 58.5                              | 273                            | Genomic          | Ca6         | 30258394                |                                                                                     |
| CaSSR374    | (TA)10                       | GCGTTAGCGTCTTGACTTC              | TGAAGTGGTATATCTTAACCCAGGA        | 60.0                              | 257                            | Genomic          | Ca6         | 30465376                |                                                                                     |
| CaSSR375    | (AGA)7                       | GACCTCGAAATGAGAAGCG              | GCATCGTCATCTTTGCTTCA             | 60.0                              | 109                            | Genic            | Ca6         | 30580648                | DNA-binding protein that binds to plastid DNA non-specifically                      |
| CaSSR376    | (AAT)7                       | AGCGATTACCTTGAATGTGAGA           | TCACACACATGGACCGAGTT             | 58.9                              | 273                            | Genomic          | Ca6         | 31079517                |                                                                                     |
| CaSSR377    | (TA)10                       | GGAGACAACCTTCTTCAACCAA           | AGCCACTTCATTGACTTGTCTC           | 58.4                              | 203                            | Genomic          | Ca6         | 32082396                |                                                                                     |
| CaSSR378#   | (ATT)9                       | CATTCCCATATTTCTCCCG              | AAGACAATCGAATCCAACGG             | 59.9                              | 266                            | Genic            | Ca6         | 32200864                | Expressed protein                                                                   |
| CaSSR379    | (GAA)6                       | TGTTCTGAATCTGTTTCAGG             | ACTTCTCTGTCTATGCAGGT             | 55.4                              | 150                            | Genic            | Ca6         | 37387965                | ovate family protein 4 (OFP4)                                                       |
| CaSSR380    | (CTA)8                       | TGTTGCTCtTTCTTTGCCT              | GAGCATGTGGTGAAGCAGaA             | 60.0                              | 152                            | Genomic          | Ca6         | 37974670                |                                                                                     |

| Marker IDs* | Microsatellite repeat-motifs | Forward Primer sequences (5'-3') | Reverse Primer sequences (5'-3') | Actual annealing temperature (°C) | Size (bp) of alleles amplified | Types of markers | Chromosomes | Physical positions (bp) | Putative functions                                                          |
|-------------|------------------------------|----------------------------------|----------------------------------|-----------------------------------|--------------------------------|------------------|-------------|-------------------------|-----------------------------------------------------------------------------|
| CaSSR381    | (AG)12                       | TACCACTTTTATACGCTGCAC            | ATGAATGAACGAATGTGACTC            | 55.7                              | 145                            | Genic            | Ca6         | 38814576                | HAIRY MERISTEM 3 (HAM3)                                                     |
| CaSSR382    | (AT)11                       | TTTTTGTTTTIGTCAATGTAATATGC       | AAGCGAGAAGCTACGGAACC             | 58.6                              | 244                            | Genomic          | Ca6         | 41910782                |                                                                             |
| CaSSR383    | (GGA)7                       | TTTTGGAGGAGGAGATATAGG            | AGTCATTTGTAATGGCATCC             | 55.1                              | 163                            | Genic            | Ca6         | 42715963                | Dof-type zinc finger DNA-binding family protein                             |
| CaSSR384    | (TA)11                       | CCCATAGAGAGCCCAACAAG             | GGTCCCTTTCTCCGTCG                | 59.7                              | 252                            | Genomic          | Ca6         | 43988772                |                                                                             |
| CaSSR385    | (AC)7(AT)6                   | CTTTCCATTTCCTATCACAA             | AAGTCCTTGCAACAAATCTCC            | 58.4                              | 218                            | Genomic          | Ca6         | 47487429                |                                                                             |
| CaSSR386    | (TA)10                       | TGAAAATTAACGCTACGGCACA           | GATGACTTGTCTCGTCGCA              | 59.1                              | 153                            | Genomic          | Ca6         | 49250840                |                                                                             |
| CaSSR387    | (CT)15                       | CACATGTTCTTGCAACCCTG             | ATTCaAAACCCaGAAAGCCC             | 60.2                              | 154                            | Genomic          | Ca6         | 50249027                |                                                                             |
| CaSSR388    | (AG)16                       | AAACGCCTTGTACCTTTTG              | AATgGGGTGTGATTTGGA               | 60.1                              | 233                            | Genomic          | Ca6         | 51773961                |                                                                             |
| CaSSR389    | (AT)9                        | CCCGCACTACACGAGGTCT              | AAATACGTGTCTGCACGTCG             | 60.3                              | 277                            | Genomic          | Ca6         | 52161279                |                                                                             |
| CaSSR390    | (TTA)7                       | CTCCTCAACCGCTGCATTAT             | TGGTGGTTCTTCTTCTACGTT            | 60.2                              | 259                            | Genomic          | Ca6         | 53565894                |                                                                             |
| CaSSR391    | (CAA)7                       | TCAACTGTTCAACAACATCCT            | GAGGAGGAGCACAGAAGTAT             | 55.6                              | 163                            | Genic            | Ca6         | 53652536                | basic helix-loop-helix (bHLH) DNA-binding superfamily protein               |
| CaSSR392    | (AAT)6                       | CGGTAAGAGAAGAAGCCACG             | TGCATTCAATTCAATCCACA             | 59.9                              | 280                            | Genic            | Ca6         | 56766583                | putative galacturonosyltransferase activity                                 |
| CaSSR393    | (GAA)6                       | GAATGGGAGGAAGTGGTTGA             | CAACCCAAACCCCTCTCTA              | 60.0                              | 198                            | Genic            | Ca6         | 56796755                | RING/U-box superfamily protein                                              |
| CaSSR394    | (AC)11                       | ACCGAAGAGTTTGTGGACG              | GCTGCACTCATGGATGTGAC             | 60.1                              | 137                            | Genomic          | Ca6         | 56978935                |                                                                             |
| CaSSR395    | (AT)7(AG)8                   | TCACCAACTCGTTGTTACCTTT           | TCAATAAACAAATCAACATTCAAG         | 60.0                              | 271                            | Genomic          | Ca6         | 57785268                |                                                                             |
| CaSSR396    | (AAG)6                       | TCGAGGATCTGATGAAGGAAG            | TTCAGTTTCACGCAATCACC             | 59.7                              | 236                            | Genic            | Ca6         | 58296246                | Major facilitator superfamily protein                                       |
| CaSSR397    | (TGTTCA)4                    | GAATCACAGCCATTAACCAT             | GACAGTGTGGAAAGACAAAG             | 55.0                              | 147                            | Genic            | Ca6         | 58334307                | transcription factor CIB1 (cryptochrome-interacting basic-helix-loop-helix) |
| CaSSR398    | (TA)6                        | TTGCTTTGAAGAAGGGGAAA             | CCACTGCTGTCTACACTGC              | 59.5                              | 155                            | Genic            | Ca7         | 1283953                 | Expressed protein                                                           |
| CaSSR399    | (AGA)7                       | AACGATTCCAAAAGTTACGAT            | GGGTTTCTGAATTAGGTTTCAT           | 55.5                              | 145                            | Genic            | Ca7         | 1371794                 | WRKY Transcription Factor                                                   |
| CaSSR400    | (CT)6(CA)7                   | TTTACACCCCTAATTCCTCC             | CAATTTCCGGCCAAAGCAATT            | 59.9                              | 151                            | Genomic          | Ca7         | 1691706                 |                                                                             |
| CaSSR401    | (TC)8                        | CGATCAGTTAAAACCGCAC              | TCTTCGACGAAACAAAGCAA             | 59.7                              | 241                            | Genomic          | Ca7         | 2219240                 |                                                                             |
| CaSSR402    | (TTA)7                       | GGGACAAGTCAGTCCGGTAA             | ACACCACCCACAGTAGGAA              | 60.3                              | 196                            | Genic            | Ca7         | 2222564                 | Expressed protein                                                           |
| CaSSR403    | (AAT)7                       | ACACCACCCACAGTAGGAA              | GGGACAAGTCAGTCCGGTAA             | 60.0                              | 196                            | Genic            | Ca7         | 2222759                 | Syntaxin/t-SNARE family protein                                             |
| CaSSR404    | (TTC)7                       | AATGGAAGTGAAGTAGTGGT             | CTCCAATCCAATTTCCATAAT            | 55.3                              | 139                            | Genic            | Ca7         | 2334917                 | AP2 family of transcriptional regulators                                    |
| CaSSR405    | (TAT)5                       | CGCCACAACAACCATATC               | CGAAAGAAATTGATGCGAGA             | 59.0                              | 202                            | Genic            | Ca7         | 2944747                 | casein Putative protein kinase 1 protein family                             |
| CaSSR406    | (TC)12                       | TCACTCCCTCGATCCTCAAC             | AGAACTTGGCAAAAGCAGC              | 59.6                              | 280                            | Genic            | Ca7         | 3046324                 | MAP Putative protein kinase Putative protein kinase 2                       |
| CaSSR407    | (TGC)4                       | AGATTTTGTGATTGAGTCAGC            | TCAACAGCAACAACAGTTACA            | 54.5                              | 174                            | Genic            | Ca7         | 3356103                 | Putative auxin response factor                                              |
| CaSSR408    | (AAG)10                      | CGGCCATTGAAATTGAAAA              | GTTGGAAACAAACACGCCCTT            | 60.0                              | 276                            | Genic            | Ca7         | 3393987                 | plastidic beta-ketoacyl-ACP synthase II                                     |
| CaSSR409    | (TCT)4                       | CAAATTGATGCTTATCAAACC            | AGAAGGAGGAGAGATGCTTAG            | 54.9                              | 159                            | Genic            | Ca7         | 3750508                 | the Aux/IAA family of proteins                                              |
| CaSSR410    | (TA)8                        | AACGCTCCAACGCTTAAAAT             | ATGTATGAAACAAACAACACGA           | 58.0                              | 266                            | Genomic          | Ca7         | 4219629                 |                                                                             |
| CaSSR411    | (CT)10                       | ATTCTCCTCATAAGCCATTCT            | TTCTCGATCTATACGTCAACC            | 54.7                              | 150                            | Genic            | Ca7         | 6057942                 | A Class II KN1-like homeodomain transcription factors                       |
| CaSSR412    | (ATTC)6                      | AGAATTCACAACCCACCGAC             | ACATCACCTCCTCCGTTTAC             | 60.0                              | 240                            | Genic            | Ca7         | 7785589                 | serine/threonine protein Putative protein kinase.                           |
| CaSSR413    | (TC)11                       | CCGATACCGGAGGATGTAGA             | CCCAAACCTCGACCTTGTGT             | 60.0                              | 239                            | Genic            | Ca7         | 8489146                 | HNH endonuclease                                                            |
| CaSSR414    | (CTT)7                       | ATCACAACGTGGTGGTAGCC             | TCTTCTTCTCCTGGGATCA              | 59.7                              | 265                            | Genic            | Ca7         | 8615603                 | TCP family transcription factor                                             |
| CaSSR415    | (CTT)9                       | TCGACATGATAACACAAGTCA            | TAAGATCAAACAACCTCACG             | 55.0                              | 163                            | Genic            | Ca7         | 8615627                 | TCP family transcription factor                                             |
| CaSSR416    | (TAT)7                       | CATCAACGACGACGAGAGAA             | AACACTTGGCCGTTGGTTAC             | 60.0                              | 214                            | Genomic          | Ca7         | 8921807                 |                                                                             |
| CaSSR417    | (AGA)6                       | GAGGAGGTGAATTTGGCAGA             | TGTTGGTTCTATTACCCCAT             | 59.5                              | 217                            | Genic            | Ca7         | 8979287                 | Dynein light chain type 1 family protein                                    |
| CaSSR418    | (AAGAAC)3                    | ATACTTCCCCTGAAGAAGATG            | CCACGAACCTCTTAAACCTTT            | 55.0                              | 142                            | Genic            | Ca7         | 9867339                 | C2H2-like zinc finger protein                                               |
| CaSSR419    | (AT)11                       | CCACATCCACAACACAACA              | TGTTCAACCCAAACCACTCA             | 58.8                              | 267                            | Genomic          | Ca7         | 9969630                 |                                                                             |
| CaSSR420    | (AGA)12                      | GGAGCTGTGAACGGTGAAT              | CGAAACGCACCCCTATTTTGT            | 60.1                              | 207                            | Genomic          | Ca7         | 10031195                |                                                                             |



| Marker IDs* | Microsatellite repeat-motifs | Forward Primer sequences (5'-3') | Reverse Primer sequences (5'-3') | Actual annealing temperature (0C) | Size (bp) of alleles amplified | Types of markers | Chromosomes | Physical positions (bp) | Putative functions                                                                            |
|-------------|------------------------------|----------------------------------|----------------------------------|-----------------------------------|--------------------------------|------------------|-------------|-------------------------|-----------------------------------------------------------------------------------------------|
| CaSSR421    | (TGAATT)4                    | TGAACTATCCCCTTTAGGAAC            | GAAGTTGATGAGTTTGATTCG            | 55.0                              | 153                            | Genic            | Ca7         | 10115566                | ERF (ethylene response factor) subfamily B-3 of ERF/AP2 transcription factor family (ATERF-5) |
| CaSSR422    | (TC)7                        | CCCAGAAAAGAGAAAACGCA             | ATTTCTCAACTGTCTCGCCG             | 60.4                              | 269                            | Genic            | Ca7         | 10296770                | Inositol phosphorylceramide synthase                                                          |
| CaSSR423    | (GTG)4                       | AAGAGTTCAAGAATTGAAGG             | AGCCATAGAGAAAGTGTTTT             | 55.2                              | 149                            | Genic            | Ca7         | 11192806                | homeobox protein HAT22, the HD-Zip II family.                                                 |
| CaSSR424    | (AC)8                        | CGTGGGACGAAGTCTGCTT              | AGTTTGGCGCTGAATTTGAC             | 60.3                              | 230                            | Genomic          | Ca7         | 11425179                |                                                                                               |
| CaSSR425    | (AGA)6g(A)10                 | TTCTTCTTAGAGCACAAACCC            | TCCTCTCTCCGTTACCCA               | 59.8                              | 190                            | Genomic          | Ca7         | 11656778                |                                                                                               |
| CaSSR426    | (AT)7ag(T)11                 | TTCTGTTTTTCATTTTTCTCAGC          | ACAACGTCGCACTAAAACGCa            | 59.8                              | 172                            | Genomic          | Ca7         | 11960437                |                                                                                               |
| CaSSR427    | (ACACAA)4                    | CCTCTCTTATTTGTTGTCAAC            | TGAAACTGTGCGTTCTGTAAC            | 54.9                              | 165                            | Genic            | Ca7         | 12021104                | WRKY DNA-binding protein 15 (WRKY15).                                                         |
| CaSSR428    | (TA)10                       | TTTGCAAAATGGCTCAcTCAT            | TTCAAATGAAATATTCTTCTCCG          | 59.3                              | 233                            | Genomic          | Ca7         | 14610251                |                                                                                               |
| CaSSR429    | (TAT)5                       | AAACTTGAGGGCAAGCCTTT             | CAAAACACAGAGTTGAAGGAACA          | 59.3                              | 103                            | Genic            | Ca7         | 14738300                | flavanone 3-hydroxylase                                                                       |
| CaSSR430#   | (AG)12                       | AAGCAGAGACCCATGTGGAG             | AGTGGGGAGGGAAACAACT              | 60.3                              | 233                            | Genomic          | Ca7         | 15721218                |                                                                                               |
| CaSSR431    | (ATGG)3                      | AGGTTTACCATCAGCTTCACT            | TCCTTATGTTGCAATGTATCC            | 55.6                              | 157                            | Genic            | Ca7         | 17777145                | G group bZIP transcription factor family member                                               |
| CaSSR432    | (ATGG)3                      | AGGTTTACCATCAGCTTCACT            | TCCTTATGTTGCAATGTATCC            | 55.6                              | 157                            | Genic            | Ca7         | 17777145                | G group bZIP transcription factor family member                                               |
| CaSSR433    | (TTC)7                       | GTCTTGGGAACCTTGCGTTA             | GATGCGTAACTACAACCGCA             | 59.8                              | 160                            | Genic            | Ca7         | 18618008                | Tetratricopeptide repeat (TPR)-like superfamily protein                                       |
| CaSSR434    | (ATT)28                      | TGAACTCAAAATAAACAACTTCC          | TCTCACTAATCCaAAACaCaAAA          | 59.8                              | 257                            | Genomic          | Ca7         | 19594142                |                                                                                               |
| CaSSR435    | (CT)18                       | ACCGCCTCAATTTCTTCTTA             | TAATTTACCGGACAGTGTCTT            | 56.6                              | 148                            | Genic            | Ca7         | 19831349                | PLATZ transcription factor family protein                                                     |
| CaSSR436    | (TTC)7                       | AGTGATTCTCTGTGCTCTGTC            | AGAATAGAAAACGGCAATGTT            | 54.5                              | 155                            | Genic            | Ca7         | 19942079                | basic helix-loop-helix (bHLH) DNA-binding superfamily protein                                 |
| CaSSR437    | (TTC)7                       | AGTGATTCTCTGTGCTCTGTC            | AGAATAGAAAACGGCAATGTT            | 54.5                              | 155                            | Genic            | Ca7         | 19942079                | basic helix-loop-helix (bHLH) DNA-binding superfamily protein                                 |
| CaSSR438    | (GAA)8                       | AACATCATCATCAAGTTGGAG            | TGAAGAAGAAGCACTTAATGG            | 55.1                              | 154                            | Genic            | Ca7         | 20120406                | putative transcription factor; KANADI family                                                  |
| CaSSR439    | (TAT)6                       | GGTTTGTCCCTTTACTTGT              | CTCTTCAACTGAACCCACCT             | 55.0                              | 141                            | Genic            | Ca7         | 20231155                | Floral homeotic gene encoding a MADS domain protein homologous to SRF transcription factors   |
| CaSSR440    | (TA)11                       | TATCTCCACTCCCTCGTTCC             | TGTTCTAGCAGGACCCCTCC             | 59.1                              | 197                            | Genomic          | Ca7         | 21614939                |                                                                                               |
| CaSSR441    | (AGC)4                       | CTGGTGTATTTTCGTGTCAGTC           | GATTCAAAATAGGGGTCTCAC            | 54.9                              | 153                            | Genic            | Ca7         | 21805504                | Putative transposase                                                                          |
| CaSSR442    | (TTGGAA)3                    | ATGATGTTGGTGTTCAGAG              | TAATATCACTGCGAAATCCAC            | 55.1                              | 159                            | Genic            | Ca7         | 24021097                | homeobox protein 34 (HB34)                                                                    |
| CaSSR443    | (AT)13                       | CCGCAATCATATCAACTTtGTG           | CCCTTCCAATTCTCAATCC              | 60.4                              | 243                            | Genomic          | Ca7         | 24412796                |                                                                                               |
| CaSSR444    | (AT)6(AC)6                   | ATGCAAAGGTGTTTCGTGTG             | CAAAGTGAGGATGAACCAATTTT          | 59.6                              | 229                            | Genomic          | Ca7         | 27443030                |                                                                                               |
| CaSSR445#   | (AG)14                       | AGCGGTAGGTACTTAAGAAGG            | AAGCTGTCTCCTAAATGGAAG            | 54.7                              | 155                            | Genic            | Ca7         | 28547368                | SBP-box gene, a the SPL gene family                                                           |
| CaSSR446    | (AATT)6                      | GCTCCTCCATTAACCTATTTC            | CAACTTCAAGCTCAATGTTTT            | 55.5                              | 168                            | Genic            | Ca7         | 28548004                | SBP-box gene, a the SPL gene family                                                           |
| CaSSR447    | (AG)6(A)12                   | TTGAATCGAAATGGGTGTGA             | cCCCTTTGCCTTTATTCCAT             | 59.9                              | 197                            | Genomic          | Ca7         | 29567814                |                                                                                               |
| CaSSR448    | (AT)21                       | TCGGATTAGTGCATGaGAAa             | GGATAATACGAgTTTGTTCGCAA          | 58.4                              | 205                            | Genomic          | Ca7         | 30653052                |                                                                                               |
| CaSSR449    | (TC)12                       | CCCCTCctACTACTGTTTCC             | AAACCTAGCTTGCCAAAACCC            | 58.4                              | 252                            | Genomic          | Ca7         | 31192294                |                                                                                               |
| CaSSR450    | (TA)10                       | GTGACGGCCTCCTTAACAAC             | TTTTGGTGGAACTTGCCT               | 59.6                              | 264                            | Genomic          | Ca7         | 31642295                |                                                                                               |
| CaSSR451    | (TTGTGA)4                    | TTTGAAGGTCTTGTGTTGTT             | AGTGCAAGAGCTATGACAAAC            | 54.9                              | 151                            | Genic            | Ca7         | 31893675                | indeterminate(ID)-domain 11 (IDD11)                                                           |
| CaSSR452    | (TTGAGT)3                    | GACAAAGCTATAACCTCAGCA            | CAGGAAACAGAAGTGAATTTG            | 54.9                              | 148                            | Genic            | Ca7         | 31894863                | indeterminate(ID)-domain 11 (IDD11)                                                           |
| CaSSR453    | (TTTGAT)6                    | CAAGAAGGTGAAGTTAAAGCA            | TCTTCAACAACAACAACAACA            | 55.0                              | 155                            | Genic            | Ca7         | 32855952                | Growth regulating factor, transcription activator                                             |
| CaSSR454    | (TTTGAT)6                    | CAAGAAGGTGAAGTTAAAGCA            | TCTTCAACAACAACAACAACA            | 55.0                              | 155                            | Genic            | Ca7         | 32855952                | Growth regulating factor, transcription activator                                             |
| CaSSR455    | (TC)8                        | TCCAATGAGGTTGTGACGAA             | CGGAGATGAATTTCCGAGA              | 60.1                              | 201                            | Genomic          | Ca7         | 33218307                |                                                                                               |

| Marker IDs* | Microsatellite repeat-motifs | Forward Primer sequences (5'-3') | Reverse Primer sequences (5'-3') | Actual annealing temperature (°C) | Size (bp) of alleles amplified | Types of markers | Chromosomes | Physical positions (bp) | Putative functions                                                               |
|-------------|------------------------------|----------------------------------|----------------------------------|-----------------------------------|--------------------------------|------------------|-------------|-------------------------|----------------------------------------------------------------------------------|
| CaSSR456    | (AAT)9                       | CAAACGGAGAGGGATGAAGA             | TGATCCATGCTTTTCCAAAT             | 58.0                              | 270                            | Genic            | Ca7         | 33782743                | Putative 1-phosphatidylinositol-3-phosphate (PtdIns3P) 5-Putative protein kinase |
| CaSSR457    | (ATG)4                       | CTTCTCCATCAACAACAAATC            | CTTGTTCCTCAAGTGACAATTC           | 54.8                              | 161                            | Genic            | Ca7         | 34320789                | NGATHA3 (NGA3)                                                                   |
| CaSSR458    | (ATC)7                       | ACCAACCCCTACAAGTCTCTTC           | GTTATGCATCTCATGGTGAAC            | 55.0                              | 142                            | Genic            | Ca7         | 34923150                | protein containing Dof zinc finger motifs                                        |
| CaSSR459    | (ATC)4                       | TCTTGAATCCAGCAGATTTAG            | TGTATTTCTCTTTTCCTCGTG            | 54.8                              | 150                            | Genic            | Ca7         | 35180540                | basic helix-loop-helix (bHLH) DNA-binding superfamily protein                    |
| CaSSR460    | (TA)11                       | ACTAATGCCAATCGCTCAGG             | ATGTGATGCGTGGTTGAGTC             | 60.2                              | 267                            | Genomic          | Ca7         | 35187940                |                                                                                  |
| CaSSR461    | (CAAGCC)3                    | ATGTCCATGCAAGTAAACAAG            | CGACGACCTCTACCTTCTACT            | 55.3                              | 137                            | Genic            | Ca7         | 38472298                | TCP family transcription factor                                                  |
| CaSSR462    | (AAT)45                      | GTCATTTTCAACTGACTCATATTCAT       | TTCTATGGaAaCCAGTGAAGC            | 57.8                              | 247                            | Genomic          | Ca7         | 42333636                |                                                                                  |
| CaSSR463    | (ATG)5                       | TACGGAGGCTATGGATGGTC             | CACTCTTCCACTCCTTTGTGTC           | 59.9                              | 194                            | Genic            | Ca7         | 48439099                | Expressed protein                                                                |
| CaSSR464    | (AAT)24                      | TCACCTTCATTGTTGGTCGT             | TTGTAATTTGTGGCACCCAG             | 59.0                              | 256                            | Genomic          | Ca7         | 48752339                |                                                                                  |
| CaSSR465    | (TTC)5                       | CCCTCTTCTCTACGACACCG             | CGGTGGaCATCCTCGTATCT             | 59.9                              | 279                            | Genomic          | Ca8         | 1930653                 |                                                                                  |
| CaSSR466    | (AG)6                        | TGTCAAAGCGAGAATTCCA              | GGAAGCAGCTGGTTTTGTTG             | 60.8                              | 280                            | Genic            | Ca8         | 2001637                 | protein with hydroxymethylglutaryl-CoA synthase activity                         |
| CaSSR467    | (ATA)7                       | CAAAGGGGAAGAAGTGTTC              | GCCATTTCTGAGTGGAAA               | 59.7                              | 219                            | Genomic          | Ca8         | 2524466                 |                                                                                  |
| CaSSR468    | (TGAT)3                      | GCTCTAAGACCCAATTGTTTT            | GAATCAGTGATGAAGAAGACG            | 55.2                              | 151                            | Genic            | Ca8         | 2557055                 | homeodomain-leucine zipper protein                                               |
| CaSSR469    | (CAA)7                       | TTTCAACAATGCCAACCAAA             | TCGAAGAAGGGGAAGAAACA             | 59.8                              | 211                            | Genic            | Ca8         | 3154215                 | basic helix-loop-helix (bHLH) DNA-binding superfamily protein                    |
| CaSSR470    | (AT)6                        | TTTTCAAAGAACCCCAACAGA            | AGCAGGACATTTGTGCAGTG             | 59.9                              | 159                            | Genic            | Ca8         | 3763063                 | Chaperone DnaJ-domain superfamily protein                                        |
| CaSSR471    | (ACT)7                       | CAAACCCCATATGCCACT               | TTAGCTGAGCTGTTGGCG               | 60.3                              | 205                            | Genic            | Ca8         | 3945750                 | Phototropic-responsive NPH3 family protein                                       |
| CaSSR472    | (TGA)5                       | TCCAATTCCTCACAAACCACA            | CTCTTAACTCCGCCGTC AAC            | 59.9                              | 197                            | Genic            | Ca8         | 4243742                 | Homeodomain-like superfamily protein                                             |
| CaSSR473    | (TTA)9                       | AAGTTGAGGAAGGGGATGGT             | TAGTGGGCTTCGTATTTGGG             | 59.8                              | 274                            | Genomic          | Ca8         | 4270429                 |                                                                                  |
| CaSSR474    | (TGT)7                       | ATATTTTGTGTTGGTGTCTG             | GAAGCCAATGGTAGAAGAAAT            | 55.2                              | 155                            | Genic            | Ca8         | 4623460                 | BEL family of homeodomain proteins                                               |
| CaSSR475    | (TGT)7                       | ATATTTTGTGTTGGTGTCTG             | GAAGCCAATGGTAGAAGAAAT            | 55.2                              | 155                            | Genic            | Ca8         | 4623460                 | BEL family of homeodomain proteins                                               |
| CaSSR476    | (AG)6aaagaga(GT)             | CGCGAAGAGAAAGAGACGAG             | TGCAGGGTATGAAAGGATGA             | 60.4                              | 141                            | Genomic          | Ca8         | 4628934                 |                                                                                  |
| CaSSR477    | (TTC)4                       | TAGATCTCACACACACAATGG            | GTTATGGTGTGAATTTTGAGG            | 54.4                              | 143                            | Genic            | Ca8         | 5196644                 | homeobox protein 24 (HB24)                                                       |
| CaSSR478    | (ATT)4                       | TCTACAGACACAAAAGGGGTA            | CACTTATCTGTGCGACTCTTT            | 54.9                              | 150                            | Genic            | Ca8         | 5411626                 | SHI gene family protein                                                          |
| CaSSR479    | (AG)7                        | CACAAAAGGGTAAGTGTGCA             | CGCATTCAACTCATTCGTGT             | 59.7                              | 232                            | Genic            | Ca8         | 5411634                 | SHI gene family protein                                                          |
| CaSSR480#   | (TTGAG)4                     | AATCCAATCGAAGAGAGAGAG            | ACTCTAGGGTTTTCACTTTCC            | 55.3                              | 154                            | Genic            | Ca8         | 5569895                 | DNA binding                                                                      |
| CaSSR481    | (GAA)6                       | TGCAAGTTAACACGAGCACC             | TTCCAGCAAATTTTGAACC              | 59.9                              | 189                            | Genic            | Ca8         | 5822343                 | Chalcone-flavanone isomerase family protein                                      |
| CaSSR482    | (GGT)5                       | TCCTCTTCGACAATTCGCTT             | GAAGGAATGGTGTCTTTGG              | 59.5                              | 173                            | Genic            | Ca8         | 6160737                 | Expressed protein                                                                |
| CaSSR483    | (TCT)8                       | TTCAATCTCTTCACGCCCTT             | GAAGGTTTCGAGTGCCTCAG             | 60.0                              | 160                            | Genic            | Ca8         | 6688803                 | Pentatricopeptide repeat (PPR) superfamily protein                               |
| CaSSR484    | (AAG)8                       | GAACCAACATGCACAATGC              | TCCTGCGTATCTGTGTCTTTGT           | 60.0                              | 278                            | Genomic          | Ca8         | 7731588                 |                                                                                  |
| CaSSR485    | (CTA)7                       | CACAAGGGTTTATGATAGTGC            | CCATGATAAGAAGACAACCTG            | 54.9                              | 150                            | Genic            | Ca8         | 8364902                 | homeobox-7 (HB-7)                                                                |
| CaSSR486    | (AGA)4                       | TGAGATTGGTGAAGAAAGG              | AATTTGTCCACCTTAGCCTAC            | 54.6                              | 155                            | Genic            | Ca8         | 8639326                 | the R2R3 factor gene family.                                                     |
| CaSSR487    | (AATAAC)5                    | TCACAGAAGCAGAATCAAAGT            | CAAAACTCAGAATCTCACCAG            | 55.2                              | 148                            | Genic            | Ca8         | 8841425                 | MYC-related transcriptional activator                                            |
| CaSSR488    | (AT)9                        | AGGCCAGTTGACACCATAGC             | GCTGGAACCAATTTCCAATGT            | 60.1                              | 171                            | Genomic          | Ca8         | 10925248                |                                                                                  |
| CaSSR489    | (TA)10                       | TTgaATATTGTTTTGATTCCTTT          | CCCTCATATTTCAAACAATCCC           | 58.1                              | 219                            | Genomic          | Ca8         | 11159303                |                                                                                  |
| CaSSR490    | (AT)10                       | CAAATCAATATACAACACATCACTCC       | CTTGCTCCTACGTATCCCCA             | 58.8                              | 215                            | Genomic          | Ca8         | 12030526                |                                                                                  |
| CaSSR491    | (TA)10                       | TGTCTTCAAAGGATAAATCATGC          | TCATTTGAGTGTGAAGATTATgG          | 59.7                              | 207                            | Genomic          | Ca8         | 13144169                |                                                                                  |
| CaSSR492    | (ACA)5                       | CCCAGATACAATGCATACGCT            | CCGATTTTCTTCTCAACA               | 60.0                              | 222                            | Genic            | Ca8         | 14017713                | Expressed protein                                                                |
| CaSSR493    | (CCT)5                       | CATCATCTGTTGCCTCTTAGT            | ATGAAGATGATGATTTTCGATG           | 54.5                              | 167                            | Genic            | Ca8         | 14955395                | Alcohol dehydrogenase transcription factor Myb/SANT-like family protein          |

| Marker IDs* | Microsatellite repeat-motifs | Forward Primer sequences (5'-3') | Reverse Primer sequences (5'-3') | Actual annealing temperature (0C) | Size (bp) of alleles amplified | Types of markers | Chromosomes | Physical positions (bp) | Putative functions                                        |
|-------------|------------------------------|----------------------------------|----------------------------------|-----------------------------------|--------------------------------|------------------|-------------|-------------------------|-----------------------------------------------------------|
| CaSSR494    | (ATCAA)4                     | AAGTACTGTGAATGCTTCCAA            | CTTGCTGAATATACGTGTGGT            | 55.1                              | 156                            | Genic            | Ca8         | 15220963                | Tesmin/TSO1-like CXC domain-containing protein            |
| CaSSR495    | (ATCAA)4                     | AAGTACTGTGAATGCTTCCAA            | CTTGCTGAATATACGTGTGGT            | 55.1                              | 156                            | Genic            | Ca8         | 15220963                | Tesmin/TSO1-like CXC domain-containing protein            |
| CaSSR496    | (TCT)4                       | TAAATGCCTAGAGATGTTCA             | CATAACTTGTTCCGAGTCTTG            | 55.2                              | 155                            | Genic            | Ca8         | 15607448                | DREB subfamily A-4 of ERF/AP2 transcription factor family |

\*CaSSR *Cicer arietinum* SSR













**Supplementary Table S5: Detailed characteristics of an inter-specific genetic linkage map of chickpea**

| <b>Linkage groups (LGs)</b> | <b>Genomic and genic SSR + SNP markers mapped</b> | <b>Map length covered (cM)</b> | <b>Average inter-marker distance (cM)</b> |
|-----------------------------|---------------------------------------------------|--------------------------------|-------------------------------------------|
| LG1                         | 41 + 42 = 83                                      | 136.70                         | 1.647                                     |
| LG2                         | 47 + 36 = 83                                      | 88.66                          | 1.068                                     |
| LG3                         | 58 + 45 = 103                                     | 114.78                         | 1.114                                     |
| LG4                         | 90 + 72 = 162                                     | 157.80                         | 0.974                                     |
| LG5                         | 62 + 50 = 112                                     | 117.28                         | 1.047                                     |
| LG6                         | 80 + 53 = 133                                     | 152.58                         | 1.147                                     |
| LG7                         | 60 + 36 = 96                                      | 110.05                         | 1.146                                     |
| LG8                         | 30 + 32 = 62                                      | 71.57                          | 1.154                                     |
| <b>Total</b>                | <b>468 + 366 = 834</b>                            | <b>949.42</b>                  | <b>1.138</b>                              |

**Supplementary Table S6: Statistical measures estimated for three yield-contributing quantitative traits in parental accessions and RIL mapping individuals**

| Traits                            | Years*  | Parental genotypes |                 | RIL mapping population |            |                               | Heritability (%) |
|-----------------------------------|---------|--------------------|-----------------|------------------------|------------|-------------------------------|------------------|
|                                   |         | ICC 4958           | ICC 17160       | Mean $\pm$ S.D.        | Range      | Coefficient of variation (CV) |                  |
| Number of branches per plant (NB) | 2011-12 | 22.5 $\pm$ 0.62    | 19.0 $\pm$ 0.46 | 20.3 $\pm$ 2.8         | 14.7-31.0  | 0.136                         | 72               |
|                                   | 2012-13 | 20.7 $\pm$ 1.12    | 17.8 $\pm$ 0.89 | 19.6 $\pm$ 2.3         | 13.8-30.4  | 0.129                         | 71               |
| Number of pods per plant (NP)     | 2011-12 | 102.0 $\pm$ 0.57   | 61.0 $\pm$ 0.76 | 76.5 $\pm$ 15.6        | 48.5-142.2 | 0.204                         | 76               |
|                                   | 2012-13 | 101.6 $\pm$ 0.88   | 59.7 $\pm$ 1.02 | 73.7 $\pm$ 13.9        | 45.7-141.8 | 0.198                         | 79               |
| 100-seed weight (g) (SW)          | 2011-12 | 31.5 $\pm$ 0.27    | 15.7 $\pm$ 0.52 | 19.3 $\pm$ 2.9         | 14.0-32.0  | 0.151                         | 86               |
|                                   | 2012-13 | 33.8 $\pm$ 0.38    | 16.9 $\pm$ 0.66 | 21.4 $\pm$ 3.4         | 15.2-33.5  | 0.163                         | 88               |

\*One-way ANOVA probabilities (F-Prob) at  $p \leq 0.001$  showing significant trait variation in RILs across two years

**Supplementary Table S7: Pearson's correlation coefficients measured among three quantitative agronomic traits in RILs**

| <b>Traits</b>                            | <b>Number of branches per plant (NB)</b> | <b>Number of pods per plant (NP)</b> | <b>100-seed weight (SW)</b> |
|------------------------------------------|------------------------------------------|--------------------------------------|-----------------------------|
| <b>Number of branches per plant (NB)</b> |                                          |                                      |                             |
| <b>Number of pods per plant (NP)</b>     | 0.86**                                   |                                      |                             |
| <b>100-seed weight (SW)</b>              | 0.32**                                   | -0.27**                              |                             |

\*\*Significance at  $p < 0.001$

\*Significance at  $p < 0.05$

**Supplementary Table S8: Structural and functional annotation of genomic region (239.1 kb) harbouring one identified strong SW trait-associated robust QTL (*qSW4.2*) resequenced through Illumina MiSeq NGS platform**

| Marker IDs | Chromosomes | Physical position (bp) | SNPs/SSRs | Genes/intergenic | Putative function   |
|------------|-------------|------------------------|-----------|------------------|---------------------|
| CaSSR248   | Ca-Chr4     | 48145725               | (ATA)6    |                  | Thioredoxin         |
| CaSNP1     | Ca-Chr4     |                        | A/G       | Intergenic       |                     |
| CaSNP2     | Ca-Chr4     |                        | A/G       | Intergenic       |                     |
| CaSNP3     | Ca-Chr4     |                        | A/C       | Intergenic       |                     |
| CaSNP4     | Ca-Chr4     |                        | A/G       | Intergenic       |                     |
| CaSNP5     | Ca-Chr4     |                        | T/C       | Intergenic       |                     |
| CaSNP6     | Ca-Chr4     |                        | A/G       | Intergenic       |                     |
| CaSNP7     | Ca-Chr4     |                        | A/G       | Intergenic       |                     |
| CaSNP8     | Ca-Chr4     |                        | A/C       | Intergenic       |                     |
| CaSNP9     | Ca-Chr4     |                        | T/C       | Intergenic       |                     |
| CaSNP10    | Ca-Chr4     |                        | T/C       | Intergenic       |                     |
| CaSNP11    | Ca-Chr4     |                        | A/G       | Intergenic       |                     |
| CaSNP12    | Ca-Chr4     |                        | G/T       | Intergenic       |                     |
| CaSNP13    | Ca-Chr4     |                        | G/A       |                  |                     |
| CaSNP14    | Ca-Chr4     |                        | A/G       |                  |                     |
| CaSNP15    | Ca-Chr4     |                        | T/C       |                  |                     |
| CaSNP16    | Ca-Chr4     |                        | T/C       |                  |                     |
| CaSNP17    | Ca-Chr4     |                        | T/C       |                  |                     |
| CaSNP18    | Ca-Chr4     |                        | A/G       |                  |                     |
| CaSNP19    | Ca-Chr4     |                        | A/C       |                  |                     |
| CaSNP20    | Ca-Chr4     |                        | A/T       | Ca_10771         | GTP-binding protein |
| CaSNP21    | Ca-Chr4     |                        | A/G       |                  |                     |
| CaSNP22    | Ca-Chr4     |                        | T/G       |                  |                     |
| CaSNP23    | Ca-Chr4     |                        | T/G       |                  |                     |
| CaSNP24    | Ca-Chr4     |                        | A/G       |                  |                     |
| CaSNP25    | Ca-Chr4     |                        | A/G       |                  |                     |
| CaSNP26    | Ca-Chr4     |                        | T/C       |                  |                     |
| CaSNP27    | Ca-Chr4     |                        | T/G       |                  |                     |
| CaSNP28    | Ca-Chr4     |                        | T/C       |                  |                     |
| CaSNP29    | Ca-Chr4     |                        | T/C       |                  |                     |
| CaSNP30    | Ca-Chr4     |                        | T/G       |                  |                     |
| CaSNP31    | Ca-Chr4     |                        | C/G       |                  |                     |
| CaSNP32    | Ca-Chr4     |                        | A/G       |                  |                     |
| CaSNP33    | Ca-Chr4     |                        | T/G       | Ca_10770         | ERF                 |
| CaSNP34    | Ca-Chr4     |                        | T/C       |                  |                     |
| CaSNP35    | Ca-Chr4     |                        | T/C       |                  |                     |
| CaSNP36    | Ca-Chr4     |                        | T/C       |                  |                     |
| CaSNP37    | Ca-Chr4     |                        | T/G       |                  |                     |
| CaSNP38    | Ca-Chr4     |                        | C/A       |                  |                     |
| CaSSR1     | Ca-Chr4     |                        | (TTA)6    | Intergenic       |                     |
| CaSSR2     | Ca-Chr4     |                        | (TTA)5    | Intergenic       |                     |
| CaSSR3     | Ca-Chr4     |                        | (AT)6     | Intergenic       |                     |
| CaSSR4     | Ca-Chr4     |                        | (ATT)23   | Intergenic       |                     |
| CaSNP39    | Ca-Chr4     |                        | A/C       | Intergenic       |                     |
| CaSNP40    | Ca-Chr4     |                        | T/C       | Intergenic       |                     |
| CaSNP41    | Ca-Chr4     |                        | T/G       | Intergenic       |                     |
| CaSNP42    | Ca-Chr4     |                        | T/G       | Intergenic       |                     |
| CaSNP43    | Ca-Chr4     |                        | G/C       | Intergenic       |                     |
| CaSNP44    | Ca-Chr4     |                        | T/C       | Intergenic       |                     |
| CaSNP45    | Ca-Chr4     |                        | T/C       | Intergenic       |                     |
| CaSNP46    | Ca-Chr4     |                        | T/C       | Intergenic       |                     |
| CaSNP47    | Ca-Chr4     |                        | T/C       | Intergenic       |                     |
| CaSNP48    | Ca-Chr4     |                        | G/A       | Intergenic       |                     |
| CaSSR5     | Ca-Chr4     |                        | (TA)7     | Intergenic       |                     |
| CaSSR6     | Ca-Chr4     |                        | (TAT)5    | Intergenic       |                     |
| CaSSR7     | Ca-Chr4     |                        | (AT)8     | Intergenic       |                     |
| CaSSR8     | Ca-Chr4     |                        | (ATT)17   | Intergenic       |                     |
| CaSSR9     | Ca-Chr4     |                        | (TA)6     | Intergenic       |                     |
| CaSSR10    | Ca-Chr4     |                        | (AG)7     | Ca_10767         | DUF702              |
| CaSSR11    | Ca-Chr4     |                        | (TC)10    | Intergenic       |                     |
| CaSSR12    | Ca-Chr4     |                        | (AT)12    | Intergenic       |                     |
| CaSSR13    | Ca-Chr4     |                        | (AT)13    | Intergenic       |                     |
| CaSSR14    | Ca-Chr4     |                        | (ATT)6    | Intergenic       |                     |
| CaSNP49    | Ca-Chr4     |                        | A/G       |                  |                     |
| CaSNP50    | Ca-Chr4     |                        | A/T       | Ca_10763         | Med11               |
| CaSNP51    | Ca-Chr4     |                        | A/G       |                  |                     |
| CaSNP52    | Ca-Chr4     |                        | A/G       |                  |                     |
| CaSSR15    | Ca-Chr4     |                        | (TTA)7    | Intergenic       |                     |
| CaSSR16    | Ca-Chr4     |                        | (TAT)17   | Intergenic       |                     |
| CaSNP53    | Ca-Chr4     |                        | A/G       | Intergenic       |                     |

| Marker IDs | Chromosomes | Physical position (bp) | SNPs/SSRs | Genes/intergenic | Putative function |
|------------|-------------|------------------------|-----------|------------------|-------------------|
| CaSNP54    | Ca-Chr4     |                        | A/G       | Intergenic       |                   |
| CaSNP55    | Ca-Chr4     |                        | A/G       | Intergenic       |                   |
| CaSNP56    | Ca-Chr4     |                        | A/G       | Intergenic       |                   |
| CaSNP57    | Ca-Chr4     |                        | T/A       | Intergenic       |                   |
| CaSNP58    | Ca-Chr4     |                        | A/G       |                  |                   |
| CaSNP59    | Ca-Chr4     |                        | T/G       |                  |                   |
| CaSNP60    | Ca-Chr4     |                        | T/C       |                  |                   |
| CaSNP61    | Ca-Chr4     |                        | A/G       |                  |                   |
| CaSNP62    | Ca-Chr4     |                        | A/G       |                  |                   |
| CaSNP63    | Ca-Chr4     |                        | T/G       |                  |                   |
| CaSNP64    | Ca-Chr4     |                        | A/T       |                  |                   |
| CaSNP65    | Ca-Chr4     |                        | T/C       |                  |                   |
| CaSNP66    | Ca-Chr4     |                        | T/C       |                  |                   |
| CaSNP67    | Ca-Chr4     |                        | T/C       |                  |                   |
| CaSNP68    | Ca-Chr4     |                        | A/G       |                  |                   |
| CaSNP69    | Ca-Chr4     |                        | A/C       |                  |                   |
| CaSNP70    | Ca-Chr4     |                        | A/G       |                  |                   |
| CaSNP71    | Ca-Chr4     |                        | A/G       |                  |                   |
| CaSNP72    | Ca-Chr4     |                        | A/G       |                  |                   |
| CaSNP73    | Ca-Chr4     |                        | A/G       |                  |                   |
| CaSNP74    | Ca-Chr4     |                        | A/C       |                  |                   |
| CaSNP75    | Ca-Chr4     |                        | A/G       |                  |                   |
| CaSNP76    | Ca-Chr4     |                        | A/G       |                  |                   |
| CaSNP77    | Ca-Chr4     |                        | A/G       |                  |                   |
| CaSNP78    | Ca-Chr4     |                        | C/G       |                  |                   |
| CaSNP79    | Ca-Chr4     |                        | A/C       |                  |                   |
| CaSNP80    | Ca-Chr4     |                        | T/C       |                  |                   |
| CaSNP81    | Ca-Chr4     |                        | T/C       |                  |                   |
| CaSNP82    | Ca-Chr4     |                        | A/G       |                  |                   |
| CaSNP83    | Ca-Chr4     |                        | A/G       |                  |                   |
| CaSNP84    | Ca-Chr4     |                        | A/G       |                  |                   |
| CaSNP85    | Ca-Chr4     |                        | T/G       |                  |                   |
| CaSNP86    | Ca-Chr4     |                        | A/G       |                  |                   |
| CaSNP87    | Ca-Chr4     |                        | T/C       |                  |                   |
| CaSNP88    | Ca-Chr4     |                        | A/G       | Ca_10760         | Amine oxidase     |
| CaSNP89    | Ca-Chr4     |                        | T/C       |                  |                   |
| CaSNP90    | Ca-Chr4     |                        | T/C       |                  |                   |
| CaSNP91    | Ca-Chr4     |                        | T/C       |                  |                   |
| CaSNP92    | Ca-Chr4     |                        | T/C       |                  |                   |
| CaSNP93    | Ca-Chr4     |                        | A/G       |                  |                   |
| CaSNP94    | Ca-Chr4     |                        | A/G       |                  |                   |
| CaSNP95    | Ca-Chr4     |                        | A/G       |                  |                   |
| CaSNP96    | Ca-Chr4     |                        | T/G       |                  |                   |
| CaSNP97    | Ca-Chr4     |                        | T/C       |                  |                   |
| CaSNP98    | Ca-Chr4     |                        | A/G       |                  |                   |
| CaSNP99    | Ca-Chr4     |                        | A/C       |                  |                   |
| CaSNP100   | Ca-Chr4     |                        | A/G       |                  |                   |
| CaSNP101   | Ca-Chr4     |                        | A/G       |                  |                   |
| CaSNP102   | Ca-Chr4     |                        | T/C       |                  |                   |
| CaSNP103   | Ca-Chr4     |                        | T/C       |                  |                   |
| CaSNP104   | Ca-Chr4     |                        | A/G       |                  |                   |
| CaSNP105   | Ca-Chr4     |                        | A/G       |                  |                   |
| CaSNP106   | Ca-Chr4     |                        | A/G       |                  |                   |
| CaSNP107   | Ca-Chr4     |                        | A/G       |                  |                   |
| CaSNP108   | Ca-Chr4     |                        | A/G       |                  |                   |
| CaSNP109   | Ca-Chr4     |                        | T/C       |                  |                   |
| CaSNP110   | Ca-Chr4     |                        | A/G       |                  |                   |
| CaSNP111   | Ca-Chr4     |                        | A/G       |                  |                   |
| CaSNP112   | Ca-Chr4     |                        | A/G       |                  |                   |
| CaSNP113   | Ca-Chr4     |                        | A/C       |                  |                   |
| CaSNP114   | Ca-Chr4     |                        | T/C       |                  |                   |
| CaSNP115   | Ca-Chr4     |                        | T/G       |                  |                   |
| CaSNP116   | Ca-Chr4     |                        | C/A       |                  |                   |
| CaSNP117   | Ca-Chr4     |                        | T/C       |                  |                   |
| CaSNP118   | Ca-Chr4     |                        | A/G       |                  |                   |
| CaSSR17    | Ca-Chr4     |                        | (CA)6     | Intergenic       |                   |
| CaSSR18    | Ca-Chr4     |                        | (AT)23    | Intergenic       |                   |
| CaSSR19    | Ca-Chr4     |                        | (AT)14    | Intergenic       |                   |
| CaSSR20    | Ca-Chr4     |                        | (AT)14    | Intergenic       |                   |
| CaSSR21    | Ca-Chr4     |                        | (AT)8     |                  |                   |
| CaSSR22    | Ca-Chr4     |                        | (AT)12    | Ca_10759         | Glyoxal oxidase   |
| CaTFSNP202 | Ca-Chr4     |                        | G/T       | Gene             | SNF-SWI3          |

| Marker IDs | Chromosomes | Physical position (bp) | SNPs/SSRs | Genes/intergenic | Putative function   |
|------------|-------------|------------------------|-----------|------------------|---------------------|
| CaSNP119   | Ca-Chr4     |                        | A/G       | Ca_10757         | Histone H3          |
| CaSSR23    | Ca-Chr4     |                        | (GA)9     | Intergenic       |                     |
| CaSNP120   | Ca-Chr4     |                        | T/C       | Intergenic       |                     |
| CaSSR24    | Ca-Chr4     |                        | (AT)12    | Intergenic       |                     |
| CaSSR25    | Ca-Chr4     |                        | (TA)13    | Intergenic       |                     |
| CaSSR26    | Ca-Chr4     |                        | (TTTA)5   | Intergenic       |                     |
| CaSNP121   | Ca-Chr4     | 48268357               | T/C       | Ca_10755         | bZIP                |
| CaSNP122   | Ca-Chr4     |                        | T/C       |                  |                     |
| CaSNP123   | Ca-Chr4     |                        | T/C       |                  |                     |
| CaSNP124   | Ca-Chr4     |                        | A/G       |                  |                     |
| CaSNP125   | Ca-Chr4     |                        | A/G       |                  |                     |
| CaSNP126   | Ca-Chr4     |                        | T/C       |                  |                     |
| CaSNP127   | Ca-Chr4     |                        | A/G       |                  |                     |
| CaSNP128   | Ca-Chr4     |                        | A/G       |                  |                     |
| CaSNP129   | Ca-Chr4     |                        | A/G       |                  |                     |
| CaSNP130   | Ca-Chr4     |                        | T/C       |                  |                     |
| CaSNP131   | Ca-Chr4     |                        | T/C       |                  |                     |
| CaSNP132   | Ca-Chr4     |                        | A/G       |                  |                     |
| CaSNP133   | Ca-Chr4     |                        | A/G       | Intergenic       |                     |
| CaSNP134   | Ca-Chr4     |                        |           | Ca_10766         | Zinc finger (B-box) |
| CaSSR27    | Ca-Chr4     |                        | (TA)6     | Intergenic       |                     |
| CaSNP135   | Ca-Chr4     |                        | T/G       | Intergenic       |                     |
| CaSNP136   | Ca-Chr4     |                        | (AT)13    | Intergenic       |                     |
| CaSSR28    | Ca-Chr4     |                        | (AT)8     | Intergenic       |                     |
| CaTFSNP175 | Ca-Chr4     |                        | G/A       | Gene             | ABI3VP1             |
| CaSNP137   | Ca-Chr4     |                        | T/C       |                  |                     |
| CaSNP138   | Ca-Chr4     |                        | A/G       |                  |                     |
| CaSNP139   | Ca-Chr4     |                        | G/A       |                  |                     |
| CaSNP140   | Ca-Chr4     |                        | C/G       |                  |                     |
| CaSNP141   | Ca-Chr4     |                        | T/C       |                  |                     |
| CaSNP142   | Ca-Chr4     |                        | T/C       |                  |                     |
| CaSNP143   | Ca-Chr4     |                        | T/C       |                  |                     |
| CaSNP144   | Ca-Chr4     |                        | T/C       |                  |                     |
| CaSNP145   | Ca-Chr4     |                        | C/G       |                  |                     |
| CaSNP146   | Ca-Chr4     |                        | T/C       |                  |                     |
| CaSNP147   | Ca-Chr4     |                        | T/C       |                  |                     |
| CaSNP148   | Ca-Chr4     |                        | T/G       |                  |                     |
| CaSNP149   | Ca-Chr4     |                        | T/C       |                  |                     |
| CaSNP150   | Ca-Chr4     |                        | A/G       |                  |                     |
| CaSNP151   | Ca-Chr4     |                        | T/C       |                  |                     |
| CaSNP152   | Ca-Chr4     |                        | T/C       |                  |                     |
| CaSNP153   | Ca-Chr4     |                        | T/C       | Intergenic       |                     |
| CaSNP154   | Ca-Chr4     |                        | G/A       | Intergenic       |                     |
| CaSNP155   | Ca-Chr4     |                        | C/G       | Intergenic       |                     |
| CaSNP156   | Ca-Chr4     |                        | G/A       | Intergenic       |                     |
| CaSNP157   | Ca-Chr4     |                        | A/G       | Intergenic       |                     |
| CaSNP158   | Ca-Chr4     |                        | A/T       | Intergenic       |                     |
| CaSNP159   | Ca-Chr4     |                        | T/C       | Intergenic       |                     |
| CaSNP160   | Ca-Chr4     |                        | T/C       | Intergenic       |                     |
| CaSNP161   | Ca-Chr4     |                        | T/C       | Intergenic       |                     |
| CaSNP162   | Ca-Chr4     |                        | T/C       | Intergenic       |                     |
| CaSNP163   | Ca-Chr4     |                        | A/G       | Intergenic       |                     |
| CaSNP164   | Ca-Chr4     |                        | T/C       | Intergenic       |                     |
| CaSNP165   | Ca-Chr4     |                        | T/C       | Intergenic       |                     |
| CaSNP166   | Ca-Chr4     |                        | C/T       | Intergenic       |                     |
| CaSNP167   | Ca-Chr4     |                        | A/G       | Intergenic       |                     |
| CaSNP168   | Ca-Chr4     |                        | T/G       | Intergenic       |                     |
| CaSNP169   | Ca-Chr4     |                        | G/T       | Intergenic       |                     |
| CaSNP170   | Ca-Chr4     |                        | C/T       | Intergenic       |                     |
| CaSNP171   | Ca-Chr4     |                        | A/G       | Intergenic       |                     |
| CaSNP172   | Ca-Chr4     |                        | T/C       | Intergenic       |                     |
| CaSNP173   | Ca-Chr4     |                        | T/C       | Intergenic       |                     |
| CaSNP174   | Ca-Chr4     |                        | A/G       | Intergenic       |                     |
| CaSNP175   | Ca-Chr4     |                        | T/C       | Intergenic       |                     |
| CaSNP176   | Ca-Chr4     |                        | G/A       | Intergenic       |                     |
| CaSNP177   | Ca-Chr4     |                        | C/T       | Intergenic       |                     |
| CaSNP178   | Ca-Chr4     |                        | C/T       | Intergenic       |                     |
| CaSNP179   | Ca-Chr4     |                        | C/A       | Intergenic       |                     |
| CaSNP180   | Ca-Chr4     |                        | C/G       | Intergenic       |                     |
| CaSNP181   | Ca-Chr4     |                        | T/C       | Intergenic       |                     |
| CaSNP182   | Ca-Chr4     |                        | C/G       | Intergenic       |                     |
| CaSNP183   | Ca-Chr4     |                        | T/C       |                  |                     |

| Marker IDs | Chromosomes | Physical position (bp) | SNPs/SSRs | Genes/intergenic | Putative function         |
|------------|-------------|------------------------|-----------|------------------|---------------------------|
| CaSNP184   | Ca-Chr4     |                        | T/C       | Ca_10754         | Cytochrome P450           |
| CaSNP185   | Ca-Chr4     |                        | A/G       |                  |                           |
| CaSNP186   | Ca-Chr4     |                        | T/G       |                  |                           |
| CaSNP187   | Ca-Chr4     |                        | C/T       |                  |                           |
| CaSNP188   | Ca-Chr4     |                        | T/G       |                  |                           |
| CaSNP189   | Ca-Chr4     |                        | T/A       |                  |                           |
| CaSNP190   | Ca-Chr4     |                        | A/G       |                  |                           |
| CaSNP191   | Ca-Chr4     |                        | A/G       |                  |                           |
| CaSNP192   | Ca-Chr4     |                        | A/G       |                  |                           |
| CaSNP193   | Ca-Chr4     |                        | A/G       | Ca_10753         | Ribosomal protein L13     |
| CaSNP194   | Ca-Chr4     | 48331023               | A/G       |                  |                           |
| CaSNP195   | Ca-Chr4     |                        | T/C       | Intergenic       |                           |
| CaSSR29    | Ca-Chr4     |                        | (AAT)5    | Intergenic       |                           |
| CaSSR30    | Ca-Chr4     |                        | (TTG)5    | Intergenic       |                           |
| CaSSR31    | Ca-Chr4     |                        | (AT)8     | Intergenic       |                           |
| CaSNP196   | Ca-Chr4     |                        | T/G       | Intergenic       |                           |
| CaSNP197   | Ca-Chr4     |                        | A/G       | Intergenic       |                           |
| CaSNP198   | Ca-Chr4     |                        | T/C       | Intergenic       |                           |
| CaSNP199   | Ca-Chr4     |                        | A/G       | Intergenic       |                           |
| CaSNP200   | Ca-Chr4     |                        | A/G       | Intergenic       |                           |
| CaSNP201   | Ca-Chr4     |                        | A/G       | Intergenic       |                           |
| CaSNP202   | Ca-Chr4     |                        | A/G       | Intergenic       |                           |
| CaSSR32    | Ca-Chr4     |                        | (AT)8     | Intergenic       |                           |
| CaSNP203   | Ca-Chr4     |                        | T/G       | Intergenic       |                           |
| CaSNP204   | Ca-Chr4     |                        | T/C       | Intergenic       |                           |
| CaSNP205   | Ca-Chr4     |                        | T/C       | Intergenic       |                           |
| CaSNP206   | Ca-Chr4     |                        | T/C       | Intergenic       |                           |
| CaSNP207   | Ca-Chr4     |                        | A/G       | Intergenic       |                           |
| CaSNP208   | Ca-Chr4     |                        | A/G       | Intergenic       |                           |
| CaSNP209   | Ca-Chr4     |                        | T/G       | Intergenic       |                           |
| CaSNP210   | Ca-Chr4     |                        | A/G       | Intergenic       |                           |
| CaSNP211   | Ca-Chr4     |                        | A/G       | Intergenic       |                           |
| CaSNP212   | Ca-Chr4     |                        | A/G       | Intergenic       |                           |
| CaSNP213   | Ca-Chr4     |                        | A/G       | Intergenic       |                           |
| CaSNP214   | Ca-Chr4     |                        | A/G       | Intergenic       |                           |
| CaSNP215   | Ca-Chr4     |                        | T/G       | Intergenic       |                           |
| CaSNP216   | Ca-Chr4     |                        | T/C       | Intergenic       |                           |
| CaSNP217   | Ca-Chr4     |                        | A/G       | Intergenic       |                           |
| CaSNP218   | Ca-Chr4     |                        | A/C       | Intergenic       |                           |
| CaSNP219   | Ca-Chr4     |                        | T/C       | Intergenic       |                           |
| CaSNP220   | Ca-Chr4     |                        | T/G       | Intergenic       |                           |
| CaSNP221   | Ca-Chr4     |                        | T/C       | Intergenic       |                           |
| CaSNP222   | Ca-Chr4     |                        | T/C       | Intergenic       |                           |
| CaSNP223   | Ca-Chr4     |                        | A/C       | Intergenic       |                           |
| CaSSR33    | Ca-Chr4     |                        | (GATAGA)5 | Ca_10750         | Unknown expressed protein |
| CaSNP224   | Ca-Chr4     |                        | A/G       |                  |                           |
| CaSNP225   | Ca-Chr4     |                        | T/C       |                  |                           |
| CaSNP226   | Ca-Chr4     |                        | A/G       |                  |                           |
| CaSNP227   | Ca-Chr4     |                        | T/C       |                  |                           |
| CaSNP228   | Ca-Chr4     |                        | T/C       |                  |                           |
| CaSNP229   | Ca-Chr4     |                        | T/C       |                  |                           |
| CaSNP230   | Ca-Chr4     |                        | T/C       |                  |                           |
| CaSNP231   | Ca-Chr4     |                        | A/G       |                  |                           |
| CaSNP232   | Ca-Chr4     |                        | A/G       |                  |                           |
| CaSNP233   | Ca-Chr4     |                        | C/T       |                  |                           |
| CaSNP234   | Ca-Chr4     |                        | T/G       |                  |                           |
| CaSNP235   | Ca-Chr4     |                        | T/C       |                  |                           |
| CaSNP236   | Ca-Chr4     |                        | A/G       |                  |                           |
| CaSNP237   | Ca-Chr4     |                        | A/G       |                  |                           |
| CaSNP238   | Ca-Chr4     |                        | T/C       |                  |                           |
| CaSNP239   | Ca-Chr4     |                        | A/G       |                  |                           |
| CaSNP240   | Ca-Chr4     |                        | A/G       |                  |                           |
| CaSNP241   | Ca-Chr4     |                        | A/G       |                  |                           |
| CaSNP242   | Ca-Chr4     |                        | A/C       |                  |                           |
| CaSNP243   | Ca-Chr4     |                        | T/C       |                  |                           |
| CaSNP244   | Ca-Chr4     |                        | T/C       |                  |                           |
| CaSNP245   | Ca-Chr4     |                        | T/C       |                  |                           |
| CaSNP246   | Ca-Chr4     |                        | A/T       |                  |                           |
| CaSNP247   | Ca-Chr4     |                        | T/C       |                  |                           |
| CaSNP248   | Ca-Chr4     |                        | T/C       |                  |                           |
| CaSNP249   | Ca-Chr4     |                        | A/G       |                  |                           |
| CaSNP250   | Ca-Chr4     |                        | T/C       |                  |                           |

| Marker IDs | Chromosomes | Physical position (bp) | SNPs/SSRs          | Genes/intergenic | Putative function |
|------------|-------------|------------------------|--------------------|------------------|-------------------|
| CaSNP251   | Ca-Chr4     |                        | A/G                |                  |                   |
| CaSNP252   | Ca-Chr4     |                        | A/C                |                  |                   |
| CaSNP253   | Ca-Chr4     |                        | T/C                |                  |                   |
| CaSNP254   | Ca-Chr4     |                        | A/G                |                  |                   |
| CaSNP255   | Ca-Chr4     |                        | A/G                |                  |                   |
| CaSNP256   | Ca-Chr4     |                        | A/G                |                  |                   |
| CaSNP257   | Ca-Chr4     |                        | A/C                |                  |                   |
| CaSNP258   | Ca-Chr4     |                        | A/G                |                  |                   |
| CaSNP259   | Ca-Chr4     |                        | T/C                |                  |                   |
| CaSNP260   | Ca-Chr4     |                        | T/G                |                  |                   |
| CaSNP261   | Ca-Chr4     |                        | T/C                |                  |                   |
| CaSNP262   | Ca-Chr4     |                        | C/A                |                  |                   |
| CaSNP263   | Ca-Chr4     |                        | A/G                |                  |                   |
| CaSNP264   | Ca-Chr4     |                        | A/C                |                  |                   |
| CaSNP265   | Ca-Chr4     |                        | T/C                |                  |                   |
| CaSNP266   | Ca-Chr4     |                        | A/C                |                  |                   |
| CaSNP267   | Ca-Chr4     |                        | T/C                |                  |                   |
| CaSNP268   | Ca-Chr4     |                        | T/C                |                  |                   |
| CaSNP269   | Ca-Chr4     |                        | G/A                |                  |                   |
| CaSNP270   | Ca-Chr4     |                        | A/G                |                  |                   |
| CaSNP271   | Ca-Chr4     |                        | A/G                |                  |                   |
| CaSNP272   | Ca-Chr4     |                        | A/G                |                  |                   |
| CaSNP273   | Ca-Chr4     |                        | A/G                |                  |                   |
| CaSNP274   | Ca-Chr4     |                        | T/G                |                  |                   |
| CaSNP275   | Ca-Chr4     |                        | T/C                |                  |                   |
| CaSNP276   | Ca-Chr4     |                        | T/C                | Intergenic       |                   |
| CaSNP277   | Ca-Chr4     |                        | T/C                | Intergenic       |                   |
| CaSNP278   | Ca-Chr4     |                        | T/C                | Intergenic       |                   |
| CaSNP279   | Ca-Chr4     |                        | A/G                | Intergenic       |                   |
| CaSSR34    | Ca-Chr4     |                        | (TAT) <sub>6</sub> | Intergenic       |                   |
| CaSNP280   | Ca-Chr4     |                        | T/A                |                  |                   |
| CaSNP281   | Ca-Chr4     |                        | A/G                |                  |                   |
| CaSNP282   | Ca-Chr4     |                        | T/A                |                  |                   |
| CaSNP283   | Ca-Chr4     |                        | A/G                |                  |                   |
| CaSNP284   | Ca-Chr4     |                        | T/C                |                  |                   |
| CaSNP285   | Ca-Chr4     |                        | T/C                |                  |                   |
| CaSNP286   | Ca-Chr4     |                        | T/C                |                  |                   |
| CaSNP287   | Ca-Chr4     |                        | A/C                |                  |                   |
| CaSNP288   | Ca-Chr4     |                        | T/C                | Ca_10749         | DUF248            |
| CaSNP289   | Ca-Chr4     |                        | A/G                |                  |                   |
| CaSNP290   | Ca-Chr4     |                        | A/G                |                  |                   |
| CaSNP291   | Ca-Chr4     |                        | T/G                |                  |                   |
| CaSNP292   | Ca-Chr4     |                        | T/A                |                  |                   |
| CaSNP293   | Ca-Chr4     |                        | T/C                |                  |                   |
| CaSNP294   | Ca-Chr4     |                        | T/C                |                  |                   |
| CaSNP295   | Ca-Chr4     |                        | T/A                |                  |                   |
| CaSNP296   | Ca-Chr4     |                        | G/C                |                  |                   |
| CaSNP297   | Ca-Chr4     | 48381171               |                    | Ca_10748         | AUX/IAA protein   |
| CaTFSNP203 | Ca-Chr4     | 48384848               | C/T                |                  | ARF               |

Structurally and functionally annotated 62.7 kb sequenced QTL interval (obtained by QTL region-specific association analysis) are marked with red coloured text
